# Supplementary material for: Review and assessment of models for predicting biocrude yields from hydrothermal liquefaction of biomass
Source: Royal Society of Chemistry journal article supplement (doi:10.1039/d3su00458a), 2024-01-01
Supplement: d3su00458a2.xlsx [file d3su00458a2.xlsx]

## Sheet: Algae
					Biomass
Reference	Author	Year	Species	Processed	Carbs wt%	Cellulose wt%	Hemicellulose wt%	Protein wt%	Lipids wt%	Lignin wt%	Sum wt%	Ash wt%	Holocellulose	Extractives	Moisture	Fixed C	Volatile Matter	Neutral detergent fiber	Acid detergent fiber	Solids Biomass	Biocrude Biomass	Aquous Biomass	Light biocrude Biomass	Heavy Biocrude Biomass	C%	H%	O%	N%	S%	P%	HHV Biomass	Reactor	Solids (g)	Water mL	Solid content (w/w) %	Pressure MPa	Heating rate C/min	b	Time to reach temp min	Holding Time (min)	T-5	Heating time	Total time (min)	Flow rate kg/h	Solvent	Temperature (C)	Solids wt%	Biocrude wt%	Aquous wt%
https://www.sciencedirect.com/science/article/pii/S0960852411008686	Vardon	2011	Spirulina algae	0	21			64	5		90	10						2	1													2			20	10-12				30	#DIV/0!	0	30		DCM	300		32.6
https://www.sciencedirect.com/science/article/pii/S0960852415016430	Lavanya	2016	Arthrospira platensis	0	14.57			62.2	11.21		87.98	12.02																				1			20	18				30	#DIV/0!	0	30		DCM	350		35
https://www.sciencedirect.com/science/article/pii/S0960852415016430	Lavanya	2016	Tetraselmis sp	0	22			58	14		94	6																				1			20	18				30	#DIV/0!	0	30		DCM	350		40
https://www.sciencedirect.com/science/article/pii/S2211926415300539	Barreiro	2015	Nannochloropsis gaditana	0	42			32.2	13.4		87.6	12.4													47.6	7.5	25.1	6.9	0.5		23.1	0.01	1	10	9.09091		18	0.150581		15	15.2675	15.2675	34.4444		DCM	350	1	60	26.8
https://www.sciencedirect.com/science/article/pii/S2211926415300539	Barreiro	2015	Scenedesmus almeriensis	0	36.9			30	13.1		80	20													38	5.6	30.4	5.5	0.5		16.8	0.01	1	10	9.09091		18	0.150581		15	15.2675	15.2675	34.4444		DCM	350	3.8	57.7	18.7
https://www.sciencedirect.com/science/article/pii/S0960852413019238	Neveux	2014	Derbesia tenuissima	0	28.7393			23.0769	11.1111		62.9274	34.7			6.4										29.2	4.8	27.4	4.5	2.8		12.4	0.02			6.6	14 - 17	262 1 min, 210 2 min, 325 min	1.153		8	1.99379	1.99379	10		DCM	335.5	8.1	19.7
https://www.sciencedirect.com/science/article/pii/S0960852413019238	Neveux	2014	Ulva ohnoi	0	47.306			17.5647	2.04741		66.9181	30.7			7.2										27.7	5.5	41.1	3.5	5		11.7	0.02			6.6	14 - 17	263 1 min, 210 2 min, 325 min	1.153		8	1.99379	1.99379	10		DCM	335.5	12.1	18.7
https://www.sciencedirect.com/science/article/pii/S0960852413019238	Neveux	2014	Chaetomorpha linum	0	46.2592			11.6965	3.47734		61.4331	36.6			5.1										26.5	4.1	31	3.4	2.1		10.3	0.02			6.6	14 - 17	264 1 min, 210 2 min, 325 min	1.153		8	1.99379	1.99379	10		DCM	335.5	8.4	9.7
https://www.sciencedirect.com/science/article/pii/S0960852413019238	Neveux	2014	Cladophora coelothrix	0	48.6602			19.0782	4.93033		72.6688	25.5			6.7										30.9	5	34.9	5.2	2.3		12.7	0.02			6.6	14 - 17	265 1 min, 210 2 min, 325 min	1.153		8	1.99379	1.99379	10		DCM	335.5	10.4	13.5
https://www.sciencedirect.com/science/article/pii/S0960852413019238	Neveux	2014	Oedogonium sp.	0	43.8503			24.0642	10.0535		77.9679	20.6			6.5										36.6	5.7	30.9	4.8	0.4		15.8	0.02			6.6	14 - 17	266 1 min, 210 2 min, 325 min	1.153		8	1.99379	1.99379	10		DCM	335.5	10.2	26.2
https://www.sciencedirect.com/science/article/pii/S0960852413019238	Neveux	2014	Cladophora vagabunda	0	47.0838			28.4199	5.62036		81.1241	17.8			5.7										37.5	5.9	32.9	6.5	1.8		16.4	0.02			6.6	14 - 17	267 1 min, 210 2 min, 325 min	1.153		8	1.99379	1.99379	10		DCM	335.5	18.7	19.7
https://www.sciencedirect.com/science/article/pii/S0960852412000144	Vardon	2012	Spirulina	0	20			64	5		89	11						2	1						45.2	6.4	37.8	9.8	0.8		17.7	0.5			20	10 12	50	0.235323		30	9.76697	9.76697			DCM	300	11	31	23
https://pubs.acs.org/doi/10.1021/ef100203u	Brown	2010	Nannochloropsissp.	0	12			52	28		92	8													43.3	6	25.1	6.4	0.5		18.2501	0.035	4.27	15	22.1588					60	#DIV/0!	0			DCM	200		27
https://pubs.acs.org/doi/10.1021/ef100203u	Brown	2010	Nannochloropsissp.	0	12			52	28		92	8													43.3	6	25.1	6.4	0.5		18.2501	0.035	4.27	15	22.1588					60	#DIV/0!	0			DCM	250		38
https://pubs.acs.org/doi/10.1021/ef100203u	Brown	2010	Nannochloropsissp.	0	12			52	28		92	8													43.3	6	25.1	6.4	0.5		18.2501	0.035	4.27	15	22.1588					60	#DIV/0!	0			DCM	300		32
https://pubs.acs.org/doi/10.1021/ef100203u	Brown	2010	Nannochloropsissp.	0	12			52	28		92	8													43.3	6	25.1	6.4	0.5		18.2501	0.035	4.27	15	22.1588					60	#DIV/0!	0			DCM	350		43
https://pubs.acs.org/doi/10.1021/ef100203u	Brown	2010	Nannochloropsissp.	0	12			52	28		92	8													43.3	6	25.1	6.4	0.5		18.2501	0.035	4.27	15	22.1588					60	#DIV/0!	0			DCM	400		40
https://pubs.acs.org/doi/10.1021/ef100203u	Brown	2010	Nannochloropsissp.	0	12			52	28		92	8													43.3	6	25.1	6.4	0.5		18.2501	0.035	4.27	15	22.1588					60	#DIV/0!	0			DCM	450		38
https://pubs.acs.org/doi/10.1021/ef100203u	Brown	2010	Nannochloropsissp.	0	12			52	28		92	8													43.3	6	25.1	6.4	0.5		18.2501	0.035	4.27	15	22.1588					60	#DIV/0!	0			DCM	500		16
https://www.sciencedirect.com/science/article/pii/S0961953412003236	Valdez	2012	Nannochloropsis sp	0	20			59	14		93	7								68		21	6.5	2.7								0.0041			15					20	#DIV/0!	0			DCM	250	20.4116	33.6652	41.6744
https://www.sciencedirect.com/science/article/pii/S0961953412003236	Valdez	2012	Nannochloropsis sp	0	20			59	14		93	7								68		21	6.5	2.7								0.0041			15					30	#DIV/0!	0			DCM	250	11.6953	33.9367	50.1395
https://www.sciencedirect.com/science/article/pii/S0961953412003236	Valdez	2012	Nannochloropsis sp	0	20			59	14		93	7								68		21	6.5	2.7								0.0041			15					60	#DIV/0!	0			DCM	250	7.74431	39.9095	46.5581
https://www.sciencedirect.com/science/article/pii/S0961953412003236	Valdez	2012	Nannochloropsis sp	0	20			59	14		93	7								68		21	6.5	2.7								0.0041			15					90	#DIV/0!	0			DCM	250	5.9481	33.1222	58.2791
https://www.sciencedirect.com/science/article/pii/S0961953412003236	Valdez	2012	Nannochloropsis sp	0	20			59	14		93	7								68		21	6.5	2.7								0.0041			15					10	#DIV/0!	0			DCM	300	5.24908	49.9548	39.0698
https://www.sciencedirect.com/science/article/pii/S0961953412003236	Valdez	2012	Nannochloropsis sp	0	20			59	14		93	7								68		21	6.5	2.7								0.0041			15					20	#DIV/0!	0			DCM	300	4.37754	50.2262	39.7209
https://www.sciencedirect.com/science/article/pii/S0961953412003236	Valdez	2012	Nannochloropsis sp	0	20			59	14		93	7								68		21	6.5	2.7								0.0041			15					40	#DIV/0!	0			DCM	300	2.72045	47.5113	37.7674
https://www.sciencedirect.com/science/article/pii/S0961953412003236	Valdez	2012	Nannochloropsis sp	0	20			59	14		93	7								68		21	6.5	2.7								0.0041			15					60	#DIV/0!	0			DCM	300	2.57196	40.181	53.0698
https://www.sciencedirect.com/science/article/pii/S0961953412003236	Valdez	2012	Nannochloropsis sp	0	20			59	14		93	7								68		21	6.5	2.7								0.0041			15					90	#DIV/0!	0			DCM	300	2.19803	39.9095	52.093
https://www.sciencedirect.com/science/article/pii/S0961953412003236	Valdez	2012	Nannochloropsis sp	0	20			59	14		93	7								68		21	6.5	2.7								0.0041			15					10	#DIV/0!	0			DCM	350	4.81783	41.81	46.8837
https://www.sciencedirect.com/science/article/pii/S0961953412003236	Valdez	2012	Nannochloropsis sp	0	20			59	14		93	7								68		21	6.5	2.7								0.0041			15					20	#DIV/0!	0			DCM	350	2.22239	39.3665	53.0698
https://www.sciencedirect.com/science/article/pii/S0961953412003236	Valdez	2012	Nannochloropsis sp	0	20			59	14		93	7								68		21	6.5	2.7								0.0041			15					40	#DIV/0!	0			DCM	350	3.53918	42.8959	46.2326
https://www.sciencedirect.com/science/article/pii/S0961953412003236	Valdez	2012	Nannochloropsis sp	0	20			59	14		93	7								68		21	6.5	2.7								0.0041			15					60	#DIV/0!	0			DCM	350	1.92497	41.5385	48.186
https://www.sciencedirect.com/science/article/pii/S0961953412003236	Valdez	2012	Nannochloropsis sp	0	20			59	14		93	7								68		21	6.5	2.7								0.0041			15					90	#DIV/0!	0			DCM	350	2.15515	42.0814	52.4186
https://www.sciencedirect.com/science/article/pii/S0961953412003236	Valdez	2012	Nannochloropsis sp	0	20			59	14		93	7								68		21	6.5	2.7								0.0041			15					10	#DIV/0!	0			DCM	400	4.43013	38.2805	42
https://www.sciencedirect.com/science/article/pii/S0961953412003236	Valdez	2012	Nannochloropsis sp	0	20			59	14		93	7								68		21	6.5	2.7								0.0041			15					20	#DIV/0!	0			DCM	400	3.21376	38.009	45.2558
https://www.sciencedirect.com/science/article/pii/S0961953412003236	Valdez	2012	Nannochloropsis sp	0	20			59	14		93	7								68		21	6.5	2.7								0.0041			15					30	#DIV/0!	0			DCM	400	1.65202	33.6652	53.0698
https://www.sciencedirect.com/science/article/pii/S0961953412003236	Valdez	2012	Nannochloropsis sp	0	20			59	14		93	7								68		21	6.5	2.7								0.0041			15					40	#DIV/0!	0			DCM	400	1.72897	32.5792	50.1395
https://www.sciencedirect.com/science/article/pii/S0961953412003236	Valdez	2012	Nannochloropsis sp	0	20			59	14		93	7								68		21	6.5	2.7								0.0041			5					60	#DIV/0!	0			DCM	350	2.96192	37.2214
https://www.sciencedirect.com/science/article/pii/S0961953412003236	Valdez	2012	Nannochloropsis sp	0	20			59	14		93	7								68		21	6.5	2.7								0.0041			10					60	#DIV/0!	0			DCM	350	1.77715	35.9379
https://www.sciencedirect.com/science/article/pii/S0961953412003236	Valdez	2012	Nannochloropsis sp	0	20			59	14		93	7								68		21	6.5	2.7								0.0041			20					60	#DIV/0!	0			DCM	350	4.54161	40.1834
https://www.sciencedirect.com/science/article/pii/S0961953412003236	Valdez	2012	Nannochloropsis sp	0	20			59	14		93	7								68		21	6.5	2.7								0.0041			35					60	#DIV/0!	0			DCM	350	2.66573	45.811
https://www.sciencedirect.com/science/article/pii/S0960852410010096	Biller	2011	Chlorella vulgaris	0	9.375			57.2917	26.0417		92.7083	7			5.9										52.6	7.1	32.2	8.2	0.5		23.2	0.075	3	27	10		10	0.104473		60	22.0056	22.0056	82.0056		DCM	350	1.40845	35.6137	57.3441
https://www.sciencedirect.com/science/article/pii/S0960852410010096	Biller	2011	Nannochloropsis occulta	0	6.48298			46.1912	25.9319		78.6062	26.4			7.2										57.8	8	25.7	8.6			17.9	0.075	3	27	10		10	0.104473		60	22.0056	22.0056	82.0056		DCM	350	2.41449	34.4064	59.3561
https://www.sciencedirect.com/science/article/pii/S0960852410010096	Biller	2011	Porphyridium cruentum	0	34.662			37.2617	6.93241		78.8562	24.4			5.1										51.3	7.6	33.1	8			14.7	0.075	3	27	10		10	0.104473		60	22.0056	22.0056	82.0056		DCM	350	4.82897	20.9256	71.6298
https://www.sciencedirect.com/science/article/pii/S0960852410010096	Biller	2011	Spirulina	0	20.4918			66.5984	5.12295		92.2131	7.6			7.8										55.7	6.8	26.4	11.2	0.8		21.2	0.075	3	27	10		10	0.104473		60	22.0056	22.0056	82.0056		DCM	350	2.21328	29.1751	55.7344
https://www.sciencedirect.com/science/article/pii/S0016236116304653	Huang	2016	Cyanobacteria sp.	0	35.38			35.2	0		70.58	29.42			85.03	9.32	61.78								33.56	5.16	25.89	5.85	0.62		14.48	0.3	10	100	9.09091		15	0.13561		60	16.9423	16.9423	76.9423		DCM	250	37.8723	11.9149
https://www.sciencedirect.com/science/article/pii/S0016236116304653	Huang	2016	Cyanobacteria sp.	0	35.38			35.2	0		70.58	29.42			85.03	9.32	61.78								33.56	5.16	25.89	5.85	0.62		14.48	0.3	10	100	9.09091		15	0.13561		60	16.9457	16.9457	76.9457		DCM	275	37.6596	13.8298
https://www.sciencedirect.com/science/article/pii/S0016236116304653	Huang	2016	Cyanobacteria sp.	0	35.38			35.2	0		70.58	29.42			85.03	9.32	61.78								33.56	5.16	25.89	5.85	0.62		14.48	0.3	10	100	9.09091		15	0.13561		60	16.9485	16.9485	76.9485		DCM	300	35.7447	17.6596
https://www.sciencedirect.com/science/article/pii/S0016236116304653	Huang	2016	Cyanobacteria sp.	0	35.38			35.2	0		70.58	29.42			85.03	9.32	61.78								33.56	5.16	25.89	5.85	0.62		14.48	0.3	10	100	9.09091		15	0.13561		60	16.9509	16.9509	76.9509		DCM	325	32.766	20.6383
https://www.sciencedirect.com/science/article/pii/S0016236116304653	Huang	2016	Cyanobacteria sp.	0	35.38			35.2	0		70.58	29.42			85.03	9.32	61.78								33.56	5.16	25.89	5.85	0.62		14.48	0.3	10	100	9.09091		15	0.13561		60	16.953	16.953	76.953		DCM	350	30	18.9362
https://www.sciencedirect.com/science/article/pii/S0016236116304653	Huang	2016	Cyanobacteria sp.	0	35.38			35.2	0		70.58	29.42			85.03	9.32	61.78								33.56	5.16	25.89	5.85	0.62		14.48	0.3	10	100	9.09091		15	0.13561		15	16.9509	16.9509	31.9509		DCM	325	33.3333	15.8508
https://www.sciencedirect.com/science/article/pii/S0016236116304653	Huang	2016	Cyanobacteria sp.	0	35.38			35.2	0		70.58	29.42			85.03	9.32	61.78								33.56	5.16	25.89	5.85	0.62		14.48	0.3	10	100	9.09091		15	0.13561		30	16.9509	16.9509	46.9509		DCM	325	33.7995	19.1142
https://www.sciencedirect.com/science/article/pii/S0016236116304653	Huang	2016	Cyanobacteria sp.	0	35.38			35.2	0		70.58	29.42			85.03	9.32	61.78								33.56	5.16	25.89	5.85	0.62		14.48	0.3	10	100	9.09091		15	0.13561		45	16.9509	16.9509	61.9509		DCM	325	33.5664	20.979
https://www.sciencedirect.com/science/article/pii/S0016236116304653	Huang	2016	Cyanobacteria sp.	0	35.38			35.2	0		70.58	29.42			85.03	9.32	61.78								33.56	5.16	25.89	5.85	0.62		14.48	0.3	10	100	9.09091		15	0.13561		90	16.9509	16.9509	106.951		DCM	325	31.7016	20.2797
https://www.sciencedirect.com/science/article/pii/S0016236116304653	Huang	2016	Bacillariophyta sp.	0	26.97			29.6	8.2		64.77	35.23			88.57	12.41	52.39								31.92	4.45	22.04	5.22	1.14		13.4	0.3	10	100	9.09091		15	0.13561		60	16.9423	16.9423	76.9423		DCM	250	35.6265	12.5307
https://www.sciencedirect.com/science/article/pii/S0016236116304653	Huang	2016	Bacillariophyta sp.	0	26.97			29.6	8.2		64.77	35.23			88.57	12.41	52.39								31.92	4.45	22.04	5.22	1.14		13.4	0.3	10	100	9.09091		15	0.13561		60	16.9457	16.9457	76.9457		DCM	275	33.4152	14.0049
https://www.sciencedirect.com/science/article/pii/S0016236116304653	Huang	2016	Bacillariophyta sp.	0	26.97			29.6	8.2		64.77	35.23			88.57	12.41	52.39								31.92	4.45	22.04	5.22	1.14		13.4	0.3	10	100	9.09091		15	0.13561		60	16.9485	16.9485	76.9485		DCM	300	32.4324	15.7248
https://www.sciencedirect.com/science/article/pii/S0016236116304653	Huang	2016	Bacillariophyta sp.	0	26.97			29.6	8.2		64.77	35.23			88.57	12.41	52.39								31.92	4.45	22.04	5.22	1.14		13.4	0.3	10	100	9.09091		15	0.13561		60	16.9509	16.9509	76.9509		DCM	325	29.484	18.1818
https://www.sciencedirect.com/science/article/pii/S0016236116304653	Huang	2016	Bacillariophyta sp.	0	26.97			29.6	8.2		64.77	35.23			88.57	12.41	52.39								31.92	4.45	22.04	5.22	1.14		13.4	0.3	10	100	9.09091		15	0.13561		60	16.953	16.953	76.953		DCM	350	25.7985	16.4619
https://www.sciencedirect.com/science/article/pii/S0016236116304653	Huang	2016	Bacillariophyta sp.	0	26.97			29.6	8.2		64.77	35.23			88.57	12.41	52.39								31.92	4.45	22.04	5.22	1.14		13.4	0.3	10	100	9.09091		15	0.13561		15	16.9509	16.9509	31.9509		DCM	325	29.6482	14.0704
https://www.sciencedirect.com/science/article/pii/S0016236116304653	Huang	2016	Bacillariophyta sp.	0	26.97			29.6	8.2		64.77	35.23			88.57	12.41	52.39								31.92	4.45	22.04	5.22	1.14		13.4	0.3	10	100	9.09091		15	0.13561		30	16.9509	16.9509	46.9509		DCM	325	29.1457	16.0804
https://www.sciencedirect.com/science/article/pii/S0016236116304653	Huang	2016	Bacillariophyta sp.	0	26.97			29.6	8.2		64.77	35.23			88.57	12.41	52.39								31.92	4.45	22.04	5.22	1.14		13.4	0.3	10	100	9.09091		15	0.13561		45	16.9509	16.9509	61.9509		DCM	325	28.392	16.5829
https://www.sciencedirect.com/science/article/pii/S0016236116304653	Huang	2016	Bacillariophyta sp.	0	26.97			29.6	8.2		64.77	35.23			88.57	12.41	52.39								31.92	4.45	22.04	5.22	1.14		13.4	0.3	10	100	9.09091		15	0.13561		90	16.9509	16.9509	106.951		DCM	325	28.1407	17.8392
https://www.sciencedirect.com/science/article/pii/001623619580001X	Minowa	1995	Dunaliella tertiolecta	0	17.8398			28.6408	24.8786		71.3592	23.6			78.4			1.2							53.3	5.2	31.7	9.8			18.9523	0.1			5					5	#DIV/0!	0			DCM	250		30.9
https://www.sciencedirect.com/science/article/pii/001623619580001X	Minowa	1995	Dunaliella tertiolecta	0	17.8398			28.6408	24.8786		71.3592	23.6			78.4			1.2							53.3	5.2	31.7	9.8			18.9523	0.1			5					60	#DIV/0!	0			DCM	250		43.2
https://www.sciencedirect.com/science/article/pii/001623619580001X	Minowa	1995	Dunaliella tertiolecta	0	17.8398			28.6408	24.8786		71.3592	23.6			78.4			1.2							53.3	5.2	31.7	9.8			18.9523	0.1			5					5	#DIV/0!	0			DCM	300		43.8
https://www.sciencedirect.com/science/article/pii/001623619580001X	Minowa	1995	Dunaliella tertiolecta	0	17.8398			28.6408	24.8786		71.3592	23.6			78.4			1.2							53.3	5.2	31.7	9.8			18.9523	0.1			5					60	#DIV/0!	0			DCM	300		34.3
https://www.sciencedirect.com/science/article/pii/001623619580001X	Minowa	1995	Dunaliella tertiolecta	0	17.8398			28.6408	24.8786		71.3592	23.6			78.4			1.2							53.3	5.2	31.7	9.8			18.9523	0.1			5					5	#DIV/0!	0			DCM	340		42.6
https://www.sciencedirect.com/science/article/pii/001623619580001X	Minowa	1995	Dunaliella tertiolecta	0	17.8398			28.6408	24.8786		71.3592	23.6			78.4			1.2							53.3	5.2	31.7	9.8			18.9523	0.1			5					60	#DIV/0!	0			DCM	340		40.4
https://www.sciencedirect.com/science/article/pii/S0960852412020020	Toor	2013	Spirulina platensis	0	22.0443			69.6136	6.96136		98.6193	1.19			5.88	7.29	85.64								42.26	5.86	47.26	3.47	1.15		20.4	0.4	50	150	25	2	6	0.0716129			32.0732	32.0732	32.0732		DCM	220	2.5	38
https://www.sciencedirect.com/science/article/pii/S0960852412020020	Toor	2013	Spirulina platensis	0	22.0443			69.6136	6.96136		98.6193	1.19			5.88	7.29	85.64								42.26	5.86	47.26	3.47	1.15		20.4	0.4	50	150	25	11.5	6	0.0716129			32.0966	32.0966	32.0966		DCM	310	2.5	30
https://www.sciencedirect.com/science/article/pii/S0960852412020020	Toor	2013	Spirulina platensis	0	22.0443			69.6136	6.96136		98.6193	1.19			5.88	7.29	85.64								42.26	5.86	47.26	3.47	1.15		20.4	0.4	50	150	25	19.5	6	0.0716129			32.1031	32.1031	32.1031		DCM	350	1.5	38
https://www.sciencedirect.com/science/article/pii/S0960852412020020	Toor	2013	Spirulina platensis	0	22.0443			69.6136	6.96136		98.6193	1.19			5.88	7.29	85.64								42.26	5.86	47.26	3.47	1.15		20.4	0.4	50	150	25	25.5	6	0.0716129			32.1064	32.1064	32.1064		DCM	375		38
https://www.sciencedirect.com/science/article/pii/S0960852412020020	Toor	2013	Nannochloropsis salina	0	39.0625			43.7973	14.2045		97.0644	2.48			4.95	5.81	86.76	39.6	24.5						55.16	6.87	33.97	2.73	1.27		25.4	0.4	50	150	25	10.7	6	0.0716129			32.0966	32.0966	32.0966		DCM	310	8	46
https://www.sciencedirect.com/science/article/pii/S0960852412020020	Toor	2013	Nannochloropsis salina	0	39.0625			43.7973	14.2045		97.0644	2.48			4.95	5.81	86.76	39.6	24.5						55.16	6.87	33.97	2.73	1.27		25.4	0.4	50	150	25	17.5	6	0.0716129			32.1031	32.1031	32.1031		DCM	350	7	34
https://www.sciencedirect.com/science/article/pii/S0960852414014412	Eboibi	2014	Spirulina sp.	0	11			53	18		82	18													44	6.8	39.7	9	0.5		19.2	1			16					5	#DIV/0!	0			DCM	300	18	36	27
https://www.sciencedirect.com/science/article/pii/S0960852414014412	Eboibi	2014	Spirulina sp.	0	11			53	18		82	18													44	6.8	39.7	9	0.5		19.2	1			16					5	#DIV/0!	0			DCM	350	12	42	16
https://www.sciencedirect.com/science/article/pii/S0960852414014412	Eboibi	2014	Tetraselmis sp.	0	22			58	14		94	6													42	6.5	40.5	8	3		18.3	1			16					5	#DIV/0!	0			DCM	300	24	34	30
https://www.sciencedirect.com/science/article/pii/S0960852414014412	Eboibi	2014	Tetraselmis sp.	0	22			58	14		94	6													42	6.5	40.5	8	3		18.3	1			16					5	#DIV/0!	0			DCM	350	14	58	12
https://www.sciencedirect.com/science/article/pii/S2211926415300102	Guo	2015	Taihu lake Cyanophyta	0	22.3226			59.8951	8.73494		90.9527	8.11			4.31										49.05	6.41	27.02	8.59	0.82	0.14	20.1466	0.0041			10			2.32082	2	60	0.989674	0.989674	60.9897		DCM	220		10.9745
https://www.sciencedirect.com/science/article/pii/S2211926415300102	Guo	2015	Taihu lake Cyanophyta	0	22.3226			59.8951	8.73494		90.9527	8.11			4.31										49.05	6.41	27.02	8.59	0.82	0.14	20.1466	0.0041			10			2.32082	2	60	0.989972	0.989972	60.99		DCM	250		21.3457
https://www.sciencedirect.com/science/article/pii/S2211926415300102	Guo	2015	Taihu lake Cyanophyta	0	22.3226			59.8951	8.73494		90.9527	8.11			4.31										49.05	6.41	27.02	8.59	0.82	0.14	20.1466	0.0041			10			2.32082	2	60	0.990206	0.990206	60.9902		DCM	280		26.4269
https://www.sciencedirect.com/science/article/pii/S2211926415300102	Guo	2015	Taihu lake Cyanophyta	0	22.3226			59.8951	8.73494		90.9527	8.11			4.31										49.05	6.41	27.02	8.59	0.82	0.14	20.1466	0.0041			10			2.32082	2	60	0.99045	0.99045	60.9904		DCM	320		32.413
https://www.sciencedirect.com/science/article/pii/S2211926415300102	Guo	2015	Taihu lake Cyanophyta	0	22.3226			59.8951	8.73494		90.9527	8.11			4.31										49.05	6.41	27.02	8.59	0.82	0.14	20.1466	0.0041			10			2.32082	2	60	0.99055	0.99055	60.9905		DCM	340		38.5383
https://www.sciencedirect.com/science/article/pii/S2211926415300102	Guo	2015	Taihu lake Cyanophyta	0	22.3226			59.8951	8.73494		90.9527	8.11			4.31										49.05	6.41	27.02	8.59	0.82	0.14	20.1466	0.0041			10			2.32082	2	60	0.990639	0.990639	60.9906		DCM	360		34.5708
https://www.sciencedirect.com/science/article/pii/S2211926415300102	Guo	2015	Taihu lake Cyanophyta	0	22.3226			59.8951	8.73494		90.9527	8.11			4.31										49.05	6.41	27.02	8.59	0.82	0.14	20.1466	0.0041			10			2.32082	2	60	0.99079	0.99079	60.9908		DCM	400		33.4571
https://www.sciencedirect.com/science/article/pii/S2211926415300102	Guo	2015	Taihu lake Cyanophyta	0	22.3226			59.8951	8.73494		90.9527	8.11			4.31										49.05	6.41	27.02	8.59	0.82	0.14	20.1466	0.0041			10			2.32082	2	10	0.99045	0.99045	10.9904		DCM	320		25.3991
https://www.sciencedirect.com/science/article/pii/S2211926415300102	Guo	2015	Taihu lake Cyanophyta	0	22.3226			59.8951	8.73494		90.9527	8.11			4.31										49.05	6.41	27.02	8.59	0.82	0.14	20.1466	0.0041			10			2.32082	2	20	0.99045	0.99045	20.9904		DCM	320		28.392
https://www.sciencedirect.com/science/article/pii/S2211926415300102	Guo	2015	Taihu lake Cyanophyta	0	22.3226			59.8951	8.73494		90.9527	8.11			4.31										49.05	6.41	27.02	8.59	0.82	0.14	20.1466	0.0041			10			2.32082	2	30	0.99045	0.99045	30.9904		DCM	320		32.0892
https://www.sciencedirect.com/science/article/pii/S2211926415300102	Guo	2015	Taihu lake Cyanophyta	0	22.3226			59.8951	8.73494		90.9527	8.11			4.31										49.05	6.41	27.02	8.59	0.82	0.14	20.1466	0.0041			10			2.32082	2	40	0.99045	0.99045	40.9904		DCM	320		34.4953
https://www.sciencedirect.com/science/article/pii/S2211926415300102	Guo	2015	Taihu lake Cyanophyta	0	22.3226			59.8951	8.73494		90.9527	8.11			4.31										49.05	6.41	27.02	8.59	0.82	0.14	20.1466	0.0041			10			2.32082	2	50	0.99045	0.99045	50.9904		DCM	320		36.4319
https://www.sciencedirect.com/science/article/pii/S2211926415300102	Guo	2015	Taihu lake Cyanophyta	0	22.3226			59.8951	8.73494		90.9527	8.11			4.31										49.05	6.41	27.02	8.59	0.82	0.14	20.1466	0.0041			10			2.32082	2	70	0.99045	0.99045	70.9904		DCM	320		29.6831
https://www.sciencedirect.com/science/article/pii/S2211926415300102	Guo	2015	Taihu lake Cyanophyta	0	22.3226			59.8951	8.73494		90.9527	8.11			4.31										49.05	6.41	27.02	8.59	0.82	0.14	20.1466	0.0041			10			2.32082	2	10	0.99068	0.99068	10.9907		DCM	370		28.5681
https://www.sciencedirect.com/science/article/pii/S2211926415300102	Guo	2015	Taihu lake Cyanophyta	0	22.3226			59.8951	8.73494		90.9527	8.11			4.31										49.05	6.41	27.02	8.59	0.82	0.14	20.1466	0.0041			10			2.32082	2	20	0.99068	0.99068	20.9907		DCM	370		31.7371
https://www.sciencedirect.com/science/article/pii/S2211926415300102	Guo	2015	Taihu lake Cyanophyta	0	22.3226			59.8951	8.73494		90.9527	8.11			4.31										49.05	6.41	27.02	8.59	0.82	0.14	20.1466	0.0041			10			2.32082	2	30	0.99068	0.99068	30.9907		DCM	370		33.2042
https://www.sciencedirect.com/science/article/pii/S2211926415300102	Guo	2015	Taihu lake Cyanophyta	0	22.3226			59.8951	8.73494		90.9527	8.11			4.31										49.05	6.41	27.02	8.59	0.82	0.14	20.1466	0.0041			10			2.32082	2	40	0.99068	0.99068	40.9907		DCM	370		36.608
https://www.sciencedirect.com/science/article/pii/S2211926415300102	Guo	2015	Taihu lake Cyanophyta	0	22.3226			59.8951	8.73494		90.9527	8.11			4.31										49.05	6.41	27.02	8.59	0.82	0.14	20.1466	0.0041			10			2.32082	2	50	0.99068	0.99068	50.9907		DCM	370		39.5423
https://www.sciencedirect.com/science/article/pii/S2211926415300102	Guo	2015	Taihu lake Cyanophyta	0	22.3226			59.8951	8.73494		90.9527	8.11			4.31										49.05	6.41	27.02	8.59	0.82	0.14	20.1466	0.0041			5			2.32082	2	60	0.99068	0.99068	60.9907		DCM	370		32.0853
https://www.sciencedirect.com/science/article/pii/S2211926415300102	Guo	2015	Taihu lake Cyanophyta	0	22.3226			59.8951	8.73494		90.9527	8.11			4.31										49.05	6.41	27.02	8.59	0.82	0.14	20.1466	0.0041			15			2.32082	2	60	0.99068	0.99068	60.9907		DCM	370		38.1872
https://www.sciencedirect.com/science/article/pii/S2211926415300102	Guo	2015	Taihu lake Cyanophyta	0	22.3226			59.8951	8.73494		90.9527	8.11			4.31										49.05	6.41	27.02	8.59	0.82	0.14	20.1466	0.0041			20			2.32082	2	60	0.99068	0.99068	60.9907		DCM	370		36.173
https://www.sciencedirect.com/science/article/pii/S2211926415300102	Guo	2015	Taihu lake Cyanophyta	0	22.3226			59.8951	8.73494		90.9527	8.11			4.31										49.05	6.41	27.02	8.59	0.82	0.14	20.1466	0.0041			25			2.32082	2	60	0.99068	0.99068	60.9907		DCM	370		37.0616
https://www.sciencedirect.com/science/article/pii/S2211926415300102	Guo	2015	Taihu lake Cyanophyta	0	22.3226			59.8951	8.73494		90.9527	8.11			4.31										49.05	6.41	27.02	8.59	0.82	0.14	20.1466	0.0041			30			2.32082	2	60	0.99068	0.99068	60.9907		DCM	370		32.4408
https://www.sciencedirect.com/science/article/pii/S0960852416305545	Hietala	2016	Nannochloropsis sp.	0	20.202			59.596	14.1414		93.9394	6																				0.00167			15					0.833333	#DIV/0!	0			DCM	200	91		12
https://www.sciencedirect.com/science/article/pii/S0960852416305545	Hietala	2016	Nannochloropsis sp.	0	20.202			59.596	14.1414		93.9394	6																				0.00167			15					2.75	#DIV/0!	0			DCM	200	50	7	26
https://www.sciencedirect.com/science/article/pii/S0960852416305545	Hietala	2016	Nannochloropsis sp.	0	20.202			59.596	14.1414		93.9394	6																				0.00167			15					6.83333	#DIV/0!	0			DCM	200	54	12	30
https://www.sciencedirect.com/science/article/pii/S0960852416305545	Hietala	2016	Nannochloropsis sp.	0	20.202			59.596	14.1414		93.9394	6																				0.00167			15					14.6667	#DIV/0!	0			DCM	200	38	18	37
https://www.sciencedirect.com/science/article/pii/S0960852416305545	Hietala	2016	Nannochloropsis sp.	0	20.202			59.596	14.1414		93.9394	6																				0.00167			15					39.6667	#DIV/0!	0			DCM	200	28	23	43
https://www.sciencedirect.com/science/article/pii/S0960852416305545	Hietala	2016	Nannochloropsis sp.	0	20.202			59.596	14.1414		93.9394	6																				0.00167			15					1.33333	#DIV/0!	0			DCM	250	43	12	24
https://www.sciencedirect.com/science/article/pii/S0960852416305545	Hietala	2016	Nannochloropsis sp.	0	20.202			59.596	14.1414		93.9394	6																				0.00167			15					2.25	#DIV/0!	0			DCM	250	46	17	35
https://www.sciencedirect.com/science/article/pii/S0960852416305545	Hietala	2016	Nannochloropsis sp.	0	20.202			59.596	14.1414		93.9394	6																				0.00167			15					4.83333	#DIV/0!	0			DCM	250	24	24	39
https://www.sciencedirect.com/science/article/pii/S0960852416305545	Hietala	2016	Nannochloropsis sp.	0	20.202			59.596	14.1414		93.9394	6																				0.00167			15					19.75	#DIV/0!	0			DCM	250	7	33	36
https://www.sciencedirect.com/science/article/pii/S0960852416305545	Hietala	2016	Nannochloropsis sp.	0	20.202			59.596	14.1414		93.9394	6																				0.00167			15					59.8333	#DIV/0!	0			DCM	250	6	41	35
https://www.sciencedirect.com/science/article/pii/S0960852416305545	Hietala	2016	Nannochloropsis sp.	0	20.202			59.596	14.1414		93.9394	6																				0.00167			15					0.25	#DIV/0!	0			DCM	300	94	2	11
https://www.sciencedirect.com/science/article/pii/S0960852416305545	Hietala	2016	Nannochloropsis sp.	0	20.202			59.596	14.1414		93.9394	6																				0.00167			15					0.416667	#DIV/0!	0			DCM	300	87	2	10
https://www.sciencedirect.com/science/article/pii/S0960852416305545	Hietala	2016	Nannochloropsis sp.	0	20.202			59.596	14.1414		93.9394	6																				0.00167			15					0.583333	#DIV/0!	0			DCM	300	83	2	17
https://www.sciencedirect.com/science/article/pii/S0960852416305545	Hietala	2016	Nannochloropsis sp.	0	20.202			59.596	14.1414		93.9394	6																				0.00167			15					1	#DIV/0!	0			DCM	300	46	13	27
https://www.sciencedirect.com/science/article/pii/S0960852416305545	Hietala	2016	Nannochloropsis sp.	0	20.202			59.596	14.1414		93.9394	6																				0.00167			15					1.25	#DIV/0!	0			DCM	300	40	18	32
https://www.sciencedirect.com/science/article/pii/S0960852416305545	Hietala	2016	Nannochloropsis sp.	0	20.202			59.596	14.1414		93.9394	6																				0.00167			15					1.75	#DIV/0!	0			DCM	300	30	26	32
https://www.sciencedirect.com/science/article/pii/S0960852416305545	Hietala	2016	Nannochloropsis sp.	0	20.202			59.596	14.1414		93.9394	6																				0.00167			15					3.16667	#DIV/0!	0			DCM	300	10	39	34
https://www.sciencedirect.com/science/article/pii/S0960852416305545	Hietala	2016	Nannochloropsis sp.	0	20.202			59.596	14.1414		93.9394	6																				0.00167			15					8	#DIV/0!	0			DCM	300	7	42	33
https://www.sciencedirect.com/science/article/pii/S0960852416305545	Hietala	2016	Nannochloropsis sp.	0	20.202			59.596	14.1414		93.9394	6																				0.00167			15					14.8333	#DIV/0!	0			DCM	300	5	43	28
https://www.sciencedirect.com/science/article/pii/S0960852416305545	Hietala	2016	Nannochloropsis sp.	0	20.202			59.596	14.1414		93.9394	6																				0.00167			15					39.6667	#DIV/0!	0			DCM	300	11	38	23
https://www.sciencedirect.com/science/article/pii/S0960852416305545	Hietala	2016	Nannochloropsis sp.	0	20.202			59.596	14.1414		93.9394	6																				0.00167			15					0.166667	#DIV/0!	0			DCM	350	76	2	13
https://www.sciencedirect.com/science/article/pii/S0960852416305545	Hietala	2016	Nannochloropsis sp.	0	20.202			59.596	14.1414		93.9394	6																				0.00167			15					1.16667	#DIV/0!	0			DCM	350	24	27	40
https://www.sciencedirect.com/science/article/pii/S0960852416305545	Hietala	2016	Nannochloropsis sp.	0	20.202			59.596	14.1414		93.9394	6																				0.00167			15					2.08333	#DIV/0!	0			DCM	350	10	37	35
https://www.sciencedirect.com/science/article/pii/S0960852416305545	Hietala	2016	Nannochloropsis sp.	0	20.202			59.596	14.1414		93.9394	6																				0.00167			15					4.33333	#DIV/0!	0			DCM	350	4	42	23
https://www.sciencedirect.com/science/article/pii/S0960852416305545	Hietala	2016	Nannochloropsis sp.	0	20.202			59.596	14.1414		93.9394	6																				0.00167			15					6.66667	#DIV/0!	0			DCM	350	5	40	18
https://www.sciencedirect.com/science/article/pii/S0960852416305545	Hietala	2016	Nannochloropsis sp.	0	20.202			59.596	14.1414		93.9394	6																				0.00167			15					9	#DIV/0!	0			DCM	350	4	43	19
https://www.sciencedirect.com/science/article/pii/S0960852416305545	Hietala	2016	Nannochloropsis sp.	0	20.202			59.596	14.1414		93.9394	6																				0.00167			15					24.6667	#DIV/0!	0			DCM	350	3	42	12
https://www.sciencedirect.com/science/article/pii/S0960852416305545	Hietala	2016	Nannochloropsis sp.	0	20.202			59.596	14.1414		93.9394	6																				0.00167			15					59.75	#DIV/0!	0			DCM	350	7	39	12
https://www.sciencedirect.com/science/article/pii/S0960852416305545	Hietala	2016	Nannochloropsis sp.	0	20.202			59.596	14.1414		93.9394	6																				0.00167			15					0.25	#DIV/0!	0			DCM	400	87	2	8
https://www.sciencedirect.com/science/article/pii/S0960852416305545	Hietala	2016	Nannochloropsis sp.	0	20.202			59.596	14.1414		93.9394	6																				0.00167			15					0.416667	#DIV/0!	0			DCM	400	61	2	18
https://www.sciencedirect.com/science/article/pii/S0960852416305545	Hietala	2016	Nannochloropsis sp.	0	20.202			59.596	14.1414		93.9394	6																				0.00167			15					0.833333	#DIV/0!	0			DCM	400	29	25	41
https://www.sciencedirect.com/science/article/pii/S0960852416305545	Hietala	2016	Nannochloropsis sp.	0	20.202			59.596	14.1414		93.9394	6																				0.00167			15					1.5	#DIV/0!	0			DCM	400	11	38	38
https://www.sciencedirect.com/science/article/pii/S0960852416305545	Hietala	2016	Nannochloropsis sp.	0	20.202			59.596	14.1414		93.9394	6																				0.00167			15					2.08333	#DIV/0!	0			DCM	400	7	40	17
https://www.sciencedirect.com/science/article/pii/S0960852416305545	Hietala	2016	Nannochloropsis sp.	0	20.202			59.596	14.1414		93.9394	6																				0.00167			15					3.41667	#DIV/0!	0			DCM	400	4	45	18
https://www.sciencedirect.com/science/article/pii/S0960852416305545	Hietala	2016	Nannochloropsis sp.	0	20.202			59.596	14.1414		93.9394	6																				0.00167			15					5.83333	#DIV/0!	0			DCM	400	3	40	14
https://www.sciencedirect.com/science/article/pii/S0960852416305545	Hietala	2016	Nannochloropsis sp.	0	20.202			59.596	14.1414		93.9394	6																				0.00167			15					8.16667	#DIV/0!	0			DCM	400	4	43	10
https://www.sciencedirect.com/science/article/pii/S0960852416305545	Hietala	2016	Nannochloropsis sp.	0	20.202			59.596	14.1414		93.9394	6																				0.00167			15					14.8333	#DIV/0!	0			DCM	400	3	36	9
https://www.sciencedirect.com/science/article/pii/S0960852416305545	Hietala	2016	Nannochloropsis sp.	0	20.202			59.596	14.1414		93.9394	6																				0.00167			15					39.8333	#DIV/0!	0			DCM	400	3	33	10
https://www.sciencedirect.com/science/article/pii/S0960852416305545	Hietala	2016	Nannochloropsis sp.	0	20.202			59.596	14.1414		93.9394	6																				0.00167			15					0.583333	#DIV/0!	0			DCM	450	42	20	32
https://www.sciencedirect.com/science/article/pii/S0960852416305545	Hietala	2016	Nannochloropsis sp.	0	20.202			59.596	14.1414		93.9394	6																				0.00167			15					0.916667	#DIV/0!	0			DCM	450	15	33	39
https://www.sciencedirect.com/science/article/pii/S0960852416305545	Hietala	2016	Nannochloropsis sp.	0	20.202			59.596	14.1414		93.9394	6																				0.00167			15					0.166667	#DIV/0!	0			DCM	500	82	1	13
https://www.sciencedirect.com/science/article/pii/S0960852416305545	Hietala	2016	Nannochloropsis sp.	0	20.202			59.596	14.1414		93.9394	6																				0.00167			15					0.25	#DIV/0!	0			DCM	500	78	1	10
https://www.sciencedirect.com/science/article/pii/S0960852416305545	Hietala	2016	Nannochloropsis sp.	0	20.202			59.596	14.1414		93.9394	6																				0.00167			15					0.416667	#DIV/0!	0			DCM	500	47	20	33
https://www.sciencedirect.com/science/article/pii/S0960852416305545	Hietala	2016	Nannochloropsis sp.	0	20.202			59.596	14.1414		93.9394	6																				0.00167			15					0.0833333	#DIV/0!	0			DCM	600	81	2	15
https://www.sciencedirect.com/science/article/pii/S0960852416305545	Hietala	2016	Nannochloropsis sp.	0	20.202			59.596	14.1414		93.9394	6																				0.00167			15					0.25	#DIV/0!	0			DCM	600	60	4	15
https://www.sciencedirect.com/science/article/pii/S0306261915015172	Reddy	2016	Nannochloropsis gaditana	0	56.9757			14.2614	21.7622		92.9993	7			79.6																25				10						#DIV/0!	0			DCM	180	62.1592	16.8151	22.9555
https://www.sciencedirect.com/science/article/pii/S0306261915015172	Reddy	2016	Nannochloropsis gaditana	0	56.9757			14.2614	21.7622		92.9993	7			79.6																25				10						#DIV/0!	0			DCM	200	55.4521	21.1606	23.9946
https://www.sciencedirect.com/science/article/pii/S0306261915015172	Reddy	2016	Nannochloropsis gaditana	0	56.9757			14.2614	21.7622		92.9993	7			79.6																25				10						#DIV/0!	0			DCM	225	45.8165	25.8839	25.6005
https://www.sciencedirect.com/science/article/pii/S0306261915015172	Reddy	2016	Nannochloropsis gaditana	0	56.9757			14.2614	21.7622		92.9993	7			79.6																25				10						#DIV/0!	0			DCM	250	44.3995	25.7895	26.9231
https://www.sciencedirect.com/science/article/pii/S0306261915015172	Reddy	2016	Nannochloropsis gaditana	0	56.9757			14.2614	21.7622		92.9993	7			79.6																25				10						#DIV/0!	0			DCM	275	42.1323	27.5843	20.8772
https://www.sciencedirect.com/science/article/pii/S0306261915015172	Reddy	2016	Nannochloropsis gaditana	0	56.9757			14.2614	21.7622		92.9993	7			79.6																25				10						#DIV/0!	0			DCM	300	23.0499	47.8003	17.4764
https://www.sciencedirect.com/science/article/pii/S0306261915015172	Reddy	2016	Nannochloropsis gaditana	0	56.9757			14.2614	21.7622		92.9993	7			79.6																25				10						#DIV/0!	0			DCM	330	16.7206	37.9757	10.108
https://www.sciencedirect.com/science/article/pii/S0306261915015172	Reddy	2016	Chlorella sp.	0	42.5819			44.3098	10.6256		97.5174	2.5			74																24.3				10						#DIV/0!	0			DCM	180	55.2233	8.99865	20.2706
https://www.sciencedirect.com/science/article/pii/S0306261915015172	Reddy	2016	Chlorella sp.	0	42.5819			44.3098	10.6256		97.5174	2.5			74																24.3				10						#DIV/0!	0			DCM	200	47.8349	12.4087	22.7334
https://www.sciencedirect.com/science/article/pii/S0306261915015172	Reddy	2016	Chlorella sp.	0	42.5819			44.3098	10.6256		97.5174	2.5			74																24.3				10						#DIV/0!	0			DCM	225	30.9743	20.1759	23.9648
https://www.sciencedirect.com/science/article/pii/S0306261915015172	Reddy	2016	Chlorella sp.	0	42.5819			44.3098	10.6256		97.5174	2.5			74																24.3				10						#DIV/0!	0			DCM	250	22.0704	27.9432	19.6076
https://www.sciencedirect.com/science/article/pii/S0306261915015172	Reddy	2016	Chlorella sp.	0	42.5819			44.3098	10.6256		97.5174	2.5			74																24.3				10						#DIV/0!	0			DCM	275	16.1028	32.8687	12.2192
https://www.sciencedirect.com/science/article/pii/S0306261915015172	Reddy	2016	Chlorella sp.	0	42.5819			44.3098	10.6256		97.5174	2.5			74																24.3				10						#DIV/0!	0			DCM	300	15.4398	32.774	4.92558
https://www.sciencedirect.com/science/article/pii/S0306261915015172	Reddy	2016	Chlorella sp.	0	42.5819			44.3098	10.6256		97.5174	2.5			74																24.3				10						#DIV/0!	0			DCM	330	13.2612	30.5954	3.59946
https://www.sciencedirect.com/science/article/pii/S2211926415300345	Shakya	2015	Nannochloropsis	0	9.56568			67.3351	19.4316		96.3324	3.42			68.88		22.51								56.83	9.32	19.93	10.13	0.37		24.02	0.1	10		14		30	0.193303		60	11.8857	11.8857	68.3333		DCM	250	32.304	28.7411	27.3159
https://www.sciencedirect.com/science/article/pii/S2211926415300345	Shakya	2015	Nannochloropsis	0	9.56568			67.3351	19.4316		96.3324	3.42			68.88		22.51								56.83	9.32	19.93	10.13	0.37		24.02	0.1	10		14		30	0.193303		60	11.8901	11.8901	70		DCM	300	15.4394	44.8931	17.5772
https://www.sciencedirect.com/science/article/pii/S2211926415300345	Shakya	2015	Nannochloropsis	0	9.56568			67.3351	19.4316		96.3324	3.42			68.88		22.51								56.83	9.32	19.93	10.13	0.37		24.02	0.1	10		14		30	0.193303		60	11.8932	11.8932	71.6667		DCM	350	11.639	49.4062	10.4513
https://www.sciencedirect.com/science/article/pii/S2211926415300345	Shakya	2015	Pavlova	0	30.3391			50.8614	15.0395		96.2401	3.47			75.8		17.74								54.34	8.69	24.01	8.67	0.82		22.69	0.1	10		14		30	0.193303		60	11.8857	11.8857	68.3333		DCM	250	25.1781	36.1045	28.266
https://www.sciencedirect.com/science/article/pii/S2211926415300345	Shakya	2015	Pavlova	0	30.3391			50.8614	15.0395		96.2401	3.47			75.8		17.74								54.34	8.69	24.01	8.67	0.82		22.69	0.1	10		14		30	0.193303		60	11.8901	11.8901	70		DCM	300	16.6271	37.7672	15.677
https://www.sciencedirect.com/science/article/pii/S2211926415300345	Shakya	2015	Pavlova	0	30.3391			50.8614	15.0395		96.2401	3.47			75.8		17.74								54.34	8.69	24.01	8.67	0.82		22.69	0.1	10		14		30	0.193303		60	11.8932	11.8932	71.6667		DCM	350	15.2019	40.6176	5.70071
https://www.sciencedirect.com/science/article/pii/S2211926415300345	Shakya	2015	Isochrysis	0	27.6169			48.118	20.5879		96.3228	3.39			73.93		18.2								55.76	8.7	23.57	7.96	0.62		22.97	0.1	10		14		30	0.193303		60	11.8857	11.8857	68.3333		DCM	250	23.753	32.7791	28.0285
https://www.sciencedirect.com/science/article/pii/S2211926415300345	Shakya	2015	Isochrysis	0	27.6169			48.118	20.5879		96.3228	3.39			73.93		18.2								55.76	8.7	23.57	7.96	0.62		22.97	0.1	10		14		30	0.193303		60	11.8901	11.8901	70		DCM	300	21.6152	33.9667	19.715
https://www.sciencedirect.com/science/article/pii/S2211926415300345	Shakya	2015	Isochrysis	0	27.6169			48.118	20.5879		96.3228	3.39			73.93		18.2								55.76	8.7	23.57	7.96	0.62		22.97	0.1	10		14		30	0.193303		60	11.8932	11.8932	71.6667		DCM	350	20.19	41.3302	9.50119
https://www.sciencedirect.com/science/article/pii/S0960852414015259	Tian	2015	Microcystis	0	51.7314			17.5265	1.34276		70.6007	41.6				41.6	44.5								23.7	4.5	25.6	3.3			9				10					30	#DIV/0!	0			DCM	260	27.2	11.6	59.7
https://www.sciencedirect.com/science/article/pii/S2211926422001308	Liu	2022	Spirulina	0	17.16			65.2	10.3		92.66	7.34																				0.35	10	100	9.09091	17.8				60	#DIV/0!	0			DCM	200	17.2061	12.7768	69.8467
https://www.sciencedirect.com/science/article/pii/S2211926422001308	Liu	2022	Spirulina	0	17.16			65.2	10.3		92.66	7.34																				0.35	10	100	9.09091	17.8				60	#DIV/0!	0			DCM	220	6.47359	19.2504	74.1056
https://www.sciencedirect.com/science/article/pii/S2211926422001308	Liu	2022	Spirulina	0	17.16			65.2	10.3		92.66	7.34																				0.35	10	100	9.09091	17.8				60	#DIV/0!	0			DCM	240	2.55537	27.2572	70.3578
https://www.sciencedirect.com/science/article/pii/S2211926422001308	Liu	2022	Spirulina	0	17.16			65.2	10.3		92.66	7.34																				0.35	10	100	9.09091	17.8				60	#DIV/0!	0			DCM	260		34.0716	66.0988
https://www.sciencedirect.com/science/article/pii/S2211926422001308	Liu	2022	Spirulina	0	17.16			65.2	10.3		92.66	7.34																				0.35	10	100	9.09091	17.8				60	#DIV/0!	0			DCM	280		31.5162	68.6542
https://www.sciencedirect.com/science/article/pii/S2211926422001308	Liu	2022	Spirulina	0	17.16			65.2	10.3		92.66	7.34																				0.35	10	100	9.09091	17.8				60	#DIV/0!	0			DCM	300		31.3458	68.3135
https://www.sciencedirect.com/science/article/pii/S2211926422001308	Liu	2022	Spirulina	0	17.16			65.2	10.3		92.66	7.34																				0.35	10	100	9.09091	17.8				60	#DIV/0!	0			DCM	320		26.9165	73.0835
https://www.sciencedirect.com/science/article/pii/S2211926422001308	Liu	2022	Spirulina	0	17.16			65.2	10.3		92.66	7.34																				0.35	10	100	9.09091	17.8				60	#DIV/0!	0			DCM	340		23.6797	76.3203
https://www.sciencedirect.com/science/article/pii/S0016236122004604	Moazezi	2022	Chlorella vulgaris	0	20			61.0526	12.1053		93.1579	6.5			5																	0.03			13					40	#DIV/0!	0			DCM	225		12.5
https://www.sciencedirect.com/science/article/pii/S0016236122004604	Moazezi	2022	Chlorella vulgaris	0	20			61.0526	12.1053		93.1579	6.5			5																	0.03			9					25	#DIV/0!	0			DCM	250		12.088
https://www.sciencedirect.com/science/article/pii/S0016236122004604	Moazezi	2022	Chlorella vulgaris	0	20			61.0526	12.1053		93.1579	6.5			5																	0.03			17					25	#DIV/0!	0			DCM	250		16.388
https://www.sciencedirect.com/science/article/pii/S0016236122004604	Moazezi	2022	Chlorella vulgaris	0	20			61.0526	12.1053		93.1579	6.5			5																	0.03			9					50	#DIV/0!	0			DCM	250		23.222
https://www.sciencedirect.com/science/article/pii/S0016236122004604	Moazezi	2022	Chlorella vulgaris	0	20			61.0526	12.1053		93.1579	6.5			5																	0.03			17					50	#DIV/0!	0			DCM	250		40.176
https://www.sciencedirect.com/science/article/pii/S0016236122004604	Moazezi	2022	Chlorella vulgaris	0	20			61.0526	12.1053		93.1579	6.5			5																	0.03			13					15	#DIV/0!	0			DCM	287		32.807
https://www.sciencedirect.com/science/article/pii/S0016236122004604	Moazezi	2022	Chlorella vulgaris	0	20			61.0526	12.1053		93.1579	6.5			5																	0.03			13					40	#DIV/0!	0			DCM	287		49.346
https://www.sciencedirect.com/science/article/pii/S0016236122004604	Moazezi	2022	Chlorella vulgaris	0	20			61.0526	12.1053		93.1579	6.5			5																	0.03			20					40	#DIV/0!	0			DCM	287		51.961
https://www.sciencedirect.com/science/article/pii/S0016236122004604	Moazezi	2022	Chlorella vulgaris	0	20			61.0526	12.1053		93.1579	6.5			5																	0.03			7					40	#DIV/0!	0			DCM	287		56.214
https://www.sciencedirect.com/science/article/pii/S0016236122004604	Moazezi	2022	Chlorella vulgaris	0	20			61.0526	12.1053		93.1579	6.5			5																	0.03			13					40	#DIV/0!	0			DCM	287		47.73
https://www.sciencedirect.com/science/article/pii/S0016236122004604	Moazezi	2022	Chlorella vulgaris	0	20			61.0526	12.1053		93.1579	6.5			5																	0.03			13					40	#DIV/0!	0			DCM	287		46.9
https://www.sciencedirect.com/science/article/pii/S0016236122004604	Moazezi	2022	Chlorella vulgaris	0	20			61.0526	12.1053		93.1579	6.5			5																	0.03			13					60	#DIV/0!	0			DCM	287		43.275
https://www.sciencedirect.com/science/article/pii/S0016236122004604	Moazezi	2022	Chlorella vulgaris	0	20			61.0526	12.1053		93.1579	6.5			5																	0.03			9					25	#DIV/0!	0			DCM	325		42.223
https://www.sciencedirect.com/science/article/pii/S0016236122004604	Moazezi	2022	Chlorella vulgaris	0	20			61.0526	12.1053		93.1579	6.5			5																	0.03			17					25	#DIV/0!	0			DCM	325		40.735
https://www.sciencedirect.com/science/article/pii/S0016236122004604	Moazezi	2022	Chlorella vulgaris	0	20			61.0526	12.1053		93.1579	6.5			5																	0.03			9					50	#DIV/0!	0			DCM	325		47.055
https://www.sciencedirect.com/science/article/pii/S0016236122004604	Moazezi	2022	Chlorella vulgaris	0	20			61.0526	12.1053		93.1579	6.5			5																	0.03			17					50	#DIV/0!	0			DCM	325		45.617
https://www.sciencedirect.com/science/article/pii/S0016236122004604	Moazezi	2022	Chlorella vulgaris	0	20			61.0526	12.1053		93.1579	6.5			5																	0.03			13					40	#DIV/0!	0			DCM	350		41.807
https://www.sciencedirect.com/science/article/pii/S0165237022000845	Wang	2022	Enteromorpha clathrata	0	22.1			36.8	1.2		60.1	39.9													25.1	4.2	61.9	8.8			3.5765	0.05	4	40	9.09091						#DIV/0!	0	30		DCM	300	10.6061	15.2681	44.4056
https://www.sciencedirect.com/science/article/pii/S0165237022000845	Wang	2022	Chlorella vulgaris	0	11			53.12	15.2		79.32	20.68													49.9	7.1	33.1	9.9			20.2869	0.05	4	40	9.09091						#DIV/0!	0	30		DCM	300	6.87646	29.2541	37.7622
https://www.sciencedirect.com/science/article/pii/S0165237022000845	Wang	2022	EN/CN 3:1	0	19.325			40.88	4.7		64.905	35.095																				0.05	4	40	9.09091						#DIV/0!	0	30		DCM	300	7.80886	26.8065	37.5291
https://www.sciencedirect.com/science/article/pii/S0165237022000845	Wang	2022	EN/CN 2:1	0	18.4			42.24	5.86667		66.5067	33.4933																				0.05	4	40	9.09091						#DIV/0!	0	30		DCM	300	13.4033	32.5175	37.6457
https://www.sciencedirect.com/science/article/pii/S0165237022000845	Wang	2022	EN/CN 1:1	0	16.55			44.96	8.2		69.71	30.29																				0.05	4	40	9.09091						#DIV/0!	0	30		DCM	300	10.9557	37.296	40.7925
https://www.sciencedirect.com/science/article/pii/S0165237022000845	Wang	2022	EN/CN 1:2	0	14.7			47.68	10.5333		72.9133	27.0867																				0.05	4	40	9.09091						#DIV/0!	0	30		DCM	300	11.8881	36.4802	46.9697
https://www.sciencedirect.com/science/article/pii/S0165237022000845	Wang	2022	EN/CN 1:3	0	13.775			49.04	11.7		74.515	25.485																				0.05	4	40	9.09091						#DIV/0!	0	30		DCM	300	6.99301	30.0699	44.5221
https://www.sciencedirect.com/science/article/pii/S0016236122014892	Dong	2022	Nannochloropsis	0	16.1564			47.4267	24.8208		88.4039	8.9			23.25										49.27	7.27	36.34	6.29	0.83		22.14	0.05	3	10	23.0769			4.62728	1		0.496476	0.496476	3		DCM	240	12.3397	26.7735	1.72009
https://www.sciencedirect.com/science/article/pii/S0016236122014892	Dong	2022	Nannochloropsis	0	16.1564			47.4267	24.8208		88.4039	8.9			23.25										49.27	7.27	36.34	6.29	0.83		22.14	0.05	3	10	23.0769			4.62728	1		0.496564	0.496564	3		DCM	260	8.97436	28.1197	2.84188
https://www.sciencedirect.com/science/article/pii/S0016236122014892	Dong	2022	Nannochloropsis	0	16.1564			47.4267	24.8208		88.4039	8.9			23.25										49.27	7.27	36.34	6.29	0.83		22.14	0.05	3	10	23.0769			4.62728	1		0.49664	0.49664	3		DCM	280	8.60043	28.7927	3.66453
https://www.sciencedirect.com/science/article/pii/S0016236122014892	Dong	2022	Nannochloropsis	0	16.1564			47.4267	24.8208		88.4039	8.9			23.25										49.27	7.27	36.34	6.29	0.83		22.14	0.05	3	10	23.0769			4.62728	1		0.496705	0.496705	3		DCM	300	6.20726	29.0171	3.96368
https://www.sciencedirect.com/science/article/pii/S0016236122014892	Dong	2022	Nannochloropsis	0	16.1564			47.4267	24.8208		88.4039	8.9			23.25										49.27	7.27	36.34	6.29	0.83		22.14	0.05	3	10	23.0769			4.62728	1		0.496476	0.496476	30		DCM	240	12.2163	26.4561	4.3469
https://www.sciencedirect.com/science/article/pii/S0016236122014892	Dong	2022	Nannochloropsis	0	16.1564			47.4267	24.8208		88.4039	8.9			23.25										49.27	7.27	36.34	6.29	0.83		22.14	0.05	3	10	23.0769			4.62728	1		0.496564	0.496564	30		DCM	260	7.34475	26.0814	4.72163
https://www.sciencedirect.com/science/article/pii/S0016236122014892	Dong	2022	Nannochloropsis	0	16.1564			47.4267	24.8208		88.4039	8.9			23.25										49.27	7.27	36.34	6.29	0.83		22.14	0.05	3	10	23.0769			4.62728	1		0.49664	0.49664	30		DCM	280	4.3469	27.2056	3.74732
https://www.sciencedirect.com/science/article/pii/S0016236122014892	Dong	2022	Nannochloropsis	0	16.1564			47.4267	24.8208		88.4039	8.9			23.25										49.27	7.27	36.34	6.29	0.83		22.14	0.05	3	10	23.0769			4.62728	1		0.496705	0.496705	30		DCM	300	3.52248	26.4561	3.52248
https://www.sciencedirect.com/science/article/pii/S0921344921002536	Dandamudi	2021	Galdieria sulphuraria	0	35.49			53.25	8.85		97.59	2.41			70										51.44	7.83	20.45	11.14	1.83	1.45	15.8	0.25			20						#DIV/0!	0	30		DCM	300	2.74	32.12	6.87
https://www.sciencedirect.com/science/article/pii/S0016236122007657	Islam	2022	gravity harvested microalgae	0	15.7698			43.2518	37.0072		96.0288	2.76			90.8	1.65	4.79								30.35	4.44	31.37	4.97			11.01	0.025			9.17431		65	0.250931			9.15946	9.15946	60		DCM	300	32.4	28.2
https://www.sciencedirect.com/science/article/pii/S0016236122007657	Islam	2022	chitosan harvested microalgae	0	13.4665			48.7702	35.6706		97.9073	1.54			93.51	1.19	3.76								38.62	5.47	27.75	5.81			15.75	0.025			6.49351		65	0.250931			9.15946	9.15946	60		DCM	300	19.7	37.9
https://www.sciencedirect.com/science/article/pii/S1385894721028096	Obeid	2022	Tetraselmis sp.	0	22.3415			11.7073	4.68293		38.7317	62.8													21.01	3.88	72.59	2.52			1.01533	0.011		3.85	30		125	0.286115			8.03015	8.03015	5		DCM	250	34.0426	22.4371	23.2108
https://www.sciencedirect.com/science/article/pii/S1385894721028096	Obeid	2022	Tetraselmis sp.	0	22.3415			11.7073	4.68293		38.7317	62.8													21.01	3.88	72.59	2.52			1.01533	0.011		3.85	30		125	0.286115			8.03015	8.03015	10		DCM	250	32.4952	17.9884	14.3133
https://www.sciencedirect.com/science/article/pii/S1385894721028096	Obeid	2022	Tetraselmis sp.	0	22.3415			11.7073	4.68293		38.7317	62.8													21.01	3.88	72.59	2.52			1.01533	0.011		3.85	30		125	0.286115			8.03015	8.03015	20		DCM	250	37.911	24.5648	7.93037
https://www.sciencedirect.com/science/article/pii/S1385894721028096	Obeid	2022	Tetraselmis sp.	0	22.3415			11.7073	4.68293		38.7317	62.8													21.01	3.88	72.59	2.52			1.01533	0.011		3.85	30		125	0.286115			8.03015	8.03015	30		DCM	250	39.4584	17.2147	14.3133
https://www.sciencedirect.com/science/article/pii/S1385894721028096	Obeid	2022	Tetraselmis sp.	0	22.3415			11.7073	4.68293		38.7317	62.8													21.01	3.88	72.59	2.52			1.01533	0.011		3.85	30		125	0.286115			8.03015	8.03015	60		DCM	250	39.8453	4.25532	13.7331
https://www.sciencedirect.com/science/article/pii/S1385894721028096	Obeid	2022	Tetraselmis sp.	0	22.3415			11.7073	4.68293		38.7317	62.8													21.01	3.88	72.59	2.52			1.01533	0.011		3.85	30		125	0.286115			8.03311	8.03311	5		DCM	300	38.9961	14.0927	11.9691
https://www.sciencedirect.com/science/article/pii/S1385894721028096	Obeid	2022	Tetraselmis sp.	0	22.3415			11.7073	4.68293		38.7317	62.8													21.01	3.88	72.59	2.52			1.01533	0.011		3.85	30		125	0.286115			8.03311	8.03311	10		DCM	300	26.0618	15.444	29.9228
https://www.sciencedirect.com/science/article/pii/S1385894721028096	Obeid	2022	Tetraselmis sp.	0	22.3415			11.7073	4.68293		38.7317	62.8													21.01	3.88	72.59	2.52			1.01533	0.011		3.85	30		125	0.286115			8.03311	8.03311	20		DCM	300	35.5212	15.251	16.2162
https://www.sciencedirect.com/science/article/pii/S1385894721028096	Obeid	2022	Tetraselmis sp.	0	22.3415			11.7073	4.68293		38.7317	62.8													21.01	3.88	72.59	2.52			1.01533	0.011		3.85	30		125	0.286115			8.03311	8.03311	30		DCM	300	34.9421	19.4981	14.6718
https://www.sciencedirect.com/science/article/pii/S1385894721028096	Obeid	2022	Tetraselmis sp.	0	22.3415			11.7073	4.68293		38.7317	62.8													21.01	3.88	72.59	2.52			1.01533	0.011		3.85	30		125	0.286115			8.03311	8.03311	60		DCM	300	39.1892	11.39	26.834
https://www.sciencedirect.com/science/article/pii/S1385894721028096	Obeid	2022	Tetraselmis sp.	0	22.3415			11.7073	4.68293		38.7317	62.8													21.01	3.88	72.59	2.52			1.01533	0.011		3.85	30		125	0.286115			8.03521	8.03521	5		DCM	350	38.417	11.583	25.6757
https://www.sciencedirect.com/science/article/pii/S1385894721028096	Obeid	2022	Tetraselmis sp.	0	22.3415			11.7073	4.68293		38.7317	62.8													21.01	3.88	72.59	2.52			1.01533	0.011		3.85	30		125	0.286115			8.03521	8.03521	10		DCM	350	19.6911	11.7761	29.1506
https://www.sciencedirect.com/science/article/pii/S1385894721028096	Obeid	2022	Tetraselmis sp.	0	22.3415			11.7073	4.68293		38.7317	62.8													21.01	3.88	72.59	2.52			1.01533	0.011		3.85	30		125	0.286115			8.03521	8.03521	20		DCM	350	16.4093	13.7066	17.1815
https://www.sciencedirect.com/science/article/pii/S1385894721028096	Obeid	2022	Tetraselmis sp.	0	22.3415			11.7073	4.68293		38.7317	62.8													21.01	3.88	72.59	2.52			1.01533	0.011		3.85	30		125	0.286115			8.03521	8.03521	30		DCM	350	25.0965	18.3398	10.0386
https://www.sciencedirect.com/science/article/pii/S1385894721028096	Obeid	2022	Tetraselmis sp.	0	22.3415			11.7073	4.68293		38.7317	62.8													21.01	3.88	72.59	2.52			1.01533	0.011		3.85	30		125	0.286115			8.03521	8.03521	60		DCM	350	31.6602	31.0811	11.1969
https://www.sciencedirect.com/science/article/pii/S0921344921001713	Dandamudi	2021	Cyanidioschyzon merolae	0								1.76				17.95	80.29			63.79	30				48.93	7.31	33.14	9.38	1.24		16.52									30	#DIV/0!	0			DCM	330	31.4015	4.63646	6.53319
https://pubs.acs.org/doi/10.1021/ef301925d	Faeth	2013	Nannochloropsis sp.	0	43.7437			41.8418	11.6116		97.1972	2.8									9.5				52.35	7.27	24.6	8.88	0.66		23.75	0.0041			15						#DIV/0!	0	1		DCM	300		13
https://pubs.acs.org/doi/10.1021/ef301925d	Faeth	2013	Nannochloropsis sp.	0	43.7437			41.8418	11.6116		97.1972	2.8									9.5				52.35	7.27	24.6	8.88	0.66		23.75	0.0041			15						#DIV/0!	0	3		DCM	300		38
https://pubs.acs.org/doi/10.1021/ef301925d	Faeth	2013	Nannochloropsis sp.	0	43.7437			41.8418	11.6116		97.1972	2.8									9.5				52.35	7.27	24.6	8.88	0.66		23.75	0.0041			15						#DIV/0!	0	5		DCM	300		44
https://pubs.acs.org/doi/10.1021/ef301925d	Faeth	2013	Nannochloropsis sp.	0	43.7437			41.8418	11.6116		97.1972	2.8									9.5				52.35	7.27	24.6	8.88	0.66		23.75	0.0041			15						#DIV/0!	0	1		DCM	350		23
https://pubs.acs.org/doi/10.1021/ef301925d	Faeth	2013	Nannochloropsis sp.	0	43.7437			41.8418	11.6116		97.1972	2.8									9.5				52.35	7.27	24.6	8.88	0.66		23.75	0.0041			15						#DIV/0!	0	3		DCM	350		50
https://pubs.acs.org/doi/10.1021/ef301925d	Faeth	2013	Nannochloropsis sp.	0	43.7437			41.8418	11.6116		97.1972	2.8									9.5				52.35	7.27	24.6	8.88	0.66		23.75	0.0041			15						#DIV/0!	0	5		DCM	350		50
https://pubs.acs.org/doi/10.1021/ef301925d	Faeth	2013	Nannochloropsis sp.	0	43.7437			41.8418	11.6116		97.1972	2.8									9.5				52.35	7.27	24.6	8.88	0.66		23.75	0.0041			15						#DIV/0!	0	1		DCM	400		32
https://pubs.acs.org/doi/10.1021/ef301925d	Faeth	2013	Nannochloropsis sp.	0	43.7437			41.8418	11.6116		97.1972	2.8									9.5				52.35	7.27	24.6	8.88	0.66		23.75	0.0041			15						#DIV/0!	0	3		DCM	400		50
https://pubs.acs.org/doi/10.1021/ef301925d	Faeth	2013	Nannochloropsis sp.	0	43.7437			41.8418	11.6116		97.1972	2.8									9.5				52.35	7.27	24.6	8.88	0.66		23.75	0.0041			15						#DIV/0!	0	5		DCM	400		43
https://pubs.acs.org/doi/10.1021/ef301925d	Faeth	2013	Nannochloropsis sp.	0	43.7437			41.8418	11.6116		97.1972	2.8									9.5				52.35	7.27	24.6	8.88	0.66		23.75	0.0041			15						#DIV/0!	0	1		DCM	450		52
https://pubs.acs.org/doi/10.1021/ef301925d	Faeth	2013	Nannochloropsis sp.	0	43.7437			41.8418	11.6116		97.1972	2.8									9.5				52.35	7.27	24.6	8.88	0.66		23.75	0.0041			15						#DIV/0!	0	3		DCM	450		48
https://pubs.acs.org/doi/10.1021/ef301925d	Faeth	2013	Nannochloropsis sp.	0	43.7437			41.8418	11.6116		97.1972	2.8									9.5				52.35	7.27	24.6	8.88	0.66		23.75	0.0041			15						#DIV/0!	0	5		DCM	450		42
https://pubs.acs.org/doi/10.1021/ef301925d	Faeth	2013	Nannochloropsis sp.	0	43.7437			41.8418	11.6116		97.1972	2.8									9.5				52.35	7.27	24.6	8.88	0.66		23.75	0.0041			15						#DIV/0!	0	1		DCM	500		55
https://pubs.acs.org/doi/10.1021/ef301925d	Faeth	2013	Nannochloropsis sp.	0	43.7437			41.8418	11.6116		97.1972	2.8									9.5				52.35	7.27	24.6	8.88	0.66		23.75	0.0041			15						#DIV/0!	0	3		DCM	500		45
https://pubs.acs.org/doi/10.1021/ef301925d	Faeth	2013	Nannochloropsis sp.	0	43.7437			41.8418	11.6116		97.1972	2.8									9.5				52.35	7.27	24.6	8.88	0.66		23.75	0.0041			15						#DIV/0!	0	5		DCM	500		28
https://pubs.acs.org/doi/10.1021/ef301925d	Faeth	2013	Nannochloropsis sp.	0	43.7437			41.8418	11.6116		97.1972	2.8									9.5				52.35	7.27	24.6	8.88	0.66		23.75	0.0041			15						#DIV/0!	0	1		DCM	550		51
https://pubs.acs.org/doi/10.1021/ef301925d	Faeth	2013	Nannochloropsis sp.	0	43.7437			41.8418	11.6116		97.1972	2.8									9.5				52.35	7.27	24.6	8.88	0.66		23.75	0.0041			15						#DIV/0!	0	3		DCM	550		20
https://pubs.acs.org/doi/10.1021/ef301925d	Faeth	2013	Nannochloropsis sp.	0	43.7437			41.8418	11.6116		97.1972	2.8									9.5				52.35	7.27	24.6	8.88	0.66		23.75	0.0041			15						#DIV/0!	0	5		DCM	550		10
https://pubs.acs.org/doi/10.1021/ef301925d	Faeth	2013	Nannochloropsis sp.	0	43.7437			41.8418	11.6116		97.1972	2.8									9.5				52.35	7.27	24.6	8.88	0.66		23.75	0.0041			15						#DIV/0!	0	1		DCM	600		66
https://pubs.acs.org/doi/10.1021/ef301925d	Faeth	2013	Nannochloropsis sp.	0	43.7437			41.8418	11.6116		97.1972	2.8									9.5				52.35	7.27	24.6	8.88	0.66		23.75	0.0041			15						#DIV/0!	0	3		DCM	600		14
https://pubs.acs.org/doi/10.1021/ef301925d	Faeth	2013	Nannochloropsis sp.	0	43.7437			41.8418	11.6116		97.1972	2.8									9.5				52.35	7.27	24.6	8.88	0.66		23.75	0.0041			15						#DIV/0!	0	5		DCM	600		10
https://pubs.acs.org/doi/10.1021/ef301925d	Faeth	2013	Nannochloropsis sp.	0	43.7437			41.8418	11.6116		97.1972	2.8									9.5				52.35	7.27	24.6	8.88	0.66		23.75	0.0041			15						#DIV/0!	0	60		DCM	300		46
https://pubs.acs.org/doi/10.1021/ef301925d	Faeth	2013	Nannochloropsis sp.	0	43.7437			41.8418	11.6116		97.1972	2.8									9.5				52.35	7.27	24.6	8.88	0.66		23.75	0.0041			15						#DIV/0!	0	60		DCM	350		40
https://pubs.acs.org/doi/10.1021/ef301925d	Faeth	2013	Nannochloropsis sp.	0	43.7437			41.8418	11.6116		97.1972	2.8									9.5				52.35	7.27	24.6	8.88	0.66		23.75	0.0041			15						#DIV/0!	0	60		DCM	400		34
https://pubs.acs.org/doi/10.1021/ef301925d	Faeth	2013	Nannochloropsis sp.	0	43.7437			41.8418	11.6116		97.1972	2.8									9.5				52.35	7.27	24.6	8.88	0.66		23.75	0.0041			15						#DIV/0!	0	60		DCM	450		17
https://pubs.acs.org/doi/10.1021/ef301925d	Faeth	2013	Nannochloropsis sp.	0	43.7437			41.8418	11.6116		97.1972	2.8									9.5				52.35	7.27	24.6	8.88	0.66		23.75	0.0041			15						#DIV/0!	0	60		DCM	500		8
https://pubs.acs.org/doi/10.1021/ef301925d	Faeth	2013	Nannochloropsis sp.	0	43.7437			41.8418	11.6116		97.1972	2.8									9.5				52.35	7.27	24.6	8.88	0.66		23.75	0.0041			15						#DIV/0!	0	60		DCM	550
https://pubs.acs.org/doi/10.1021/ef301925d	Faeth	2013	Nannochloropsis sp.	0	43.7437			41.8418	11.6116		97.1972	2.8									9.5				52.35	7.27	24.6	8.88	0.66		23.75	0.0041			15						#DIV/0!	0	10		DCM	600		8
https://pubs.acs.org/doi/10.1021/ef301925d	Faeth	2013	Nannochloropsis sp.	0	43.7437			41.8418	11.6116		97.1972	2.8									9.5				52.35	7.27	24.6	8.88	0.66		23.75	0.0041			15						#DIV/0!	0	20		DCM	250		35
https://pubs.acs.org/doi/10.1021/ef301925d	Faeth	2013	Nannochloropsis sp.	0	43.7437			41.8418	11.6116		97.1972	2.8									9.5				52.35	7.27	24.6	8.88	0.66		23.75	0.0041			15						#DIV/0!	0	30		DCM	250		35
https://pubs.acs.org/doi/10.1021/ef301925d	Faeth	2013	Nannochloropsis sp.	0	43.7437			41.8418	11.6116		97.1972	2.8									9.5				52.35	7.27	24.6	8.88	0.66		23.75	0.0041			15						#DIV/0!	0	60		DCM	250		43
https://pubs.acs.org/doi/10.1021/ef301925d	Faeth	2013	Nannochloropsis sp.	0	43.7437			41.8418	11.6116		97.1972	2.8									9.5				52.35	7.27	24.6	8.88	0.66		23.75	0.0041			15						#DIV/0!	0	90		DCM	250		34
https://pubs.acs.org/doi/10.1021/ef301925d	Faeth	2013	Nannochloropsis sp.	0	43.7437			41.8418	11.6116		97.1972	2.8									9.5				52.35	7.27	24.6	8.88	0.66		23.75	0.0041			15						#DIV/0!	0	10		DCM	300		51
https://pubs.acs.org/doi/10.1021/ef301925d	Faeth	2013	Nannochloropsis sp.	0	43.7437			41.8418	11.6116		97.1972	2.8									9.5				52.35	7.27	24.6	8.88	0.66		23.75	0.0041			15						#DIV/0!	0	20		DCM	300		52
https://pubs.acs.org/doi/10.1021/ef301925d	Faeth	2013	Nannochloropsis sp.	0	43.7437			41.8418	11.6116		97.1972	2.8									9.5				52.35	7.27	24.6	8.88	0.66		23.75	0.0041			15						#DIV/0!	0	40		DCM	300		49
https://pubs.acs.org/doi/10.1021/ef301925d	Faeth	2013	Nannochloropsis sp.	0	43.7437			41.8418	11.6116		97.1972	2.8									9.5				52.35	7.27	24.6	8.88	0.66		23.75	0.0041			15						#DIV/0!	0	60		DCM	300		41
https://pubs.acs.org/doi/10.1021/ef301925d	Faeth	2013	Nannochloropsis sp.	0	43.7437			41.8418	11.6116		97.1972	2.8									9.5				52.35	7.27	24.6	8.88	0.66		23.75	0.0041			15						#DIV/0!	0	90		DCM	300		41
https://pubs.acs.org/doi/10.1021/ef301925d	Faeth	2013	Nannochloropsis sp.	0	43.7437			41.8418	11.6116		97.1972	2.8									9.5				52.35	7.27	24.6	8.88	0.66		23.75	0.0041			15						#DIV/0!	0	10		DCM	350		44
https://pubs.acs.org/doi/10.1021/ef301925d	Faeth	2013	Nannochloropsis sp.	0	43.7437			41.8418	11.6116		97.1972	2.8									9.5				52.35	7.27	24.6	8.88	0.66		23.75	0.0041			15						#DIV/0!	0	20		DCM	350		41
https://pubs.acs.org/doi/10.1021/ef301925d	Faeth	2013	Nannochloropsis sp.	0	43.7437			41.8418	11.6116		97.1972	2.8									9.5				52.35	7.27	24.6	8.88	0.66		23.75	0.0041			15						#DIV/0!	0	40		DCM	350		44
https://pubs.acs.org/doi/10.1021/ef301925d	Faeth	2013	Nannochloropsis sp.	0	43.7437			41.8418	11.6116		97.1972	2.8									9.5				52.35	7.27	24.6	8.88	0.66		23.75	0.0041			15						#DIV/0!	0	60		DCM	350		42
https://pubs.acs.org/doi/10.1021/ef301925d	Faeth	2013	Nannochloropsis sp.	0	43.7437			41.8418	11.6116		97.1972	2.8									9.5				52.35	7.27	24.6	8.88	0.66		23.75	0.0041			15						#DIV/0!	0	90		DCM	350		44
https://pubs.acs.org/doi/10.1021/ef301925d	Faeth	2013	Nannochloropsis sp.	0	43.7437			41.8418	11.6116		97.1972	2.8									9.5				52.35	7.27	24.6	8.88	0.66		23.75	0.0041			15						#DIV/0!	0	10		DCM	400		39
https://pubs.acs.org/doi/10.1021/ef301925d	Faeth	2013	Nannochloropsis sp.	0	43.7437			41.8418	11.6116		97.1972	2.8									9.5				52.35	7.27	24.6	8.88	0.66		23.75	0.0041			15						#DIV/0!	0	20		DCM	400		39
https://pubs.acs.org/doi/10.1021/ef301925d	Faeth	2013	Nannochloropsis sp.	0	43.7437			41.8418	11.6116		97.1972	2.8									9.5				52.35	7.27	24.6	8.88	0.66		23.75	0.0041			15						#DIV/0!	0	30		DCM	400		35
https://pubs.acs.org/doi/10.1021/ef301925d	Faeth	2013	Nannochloropsis sp.	0	43.7437			41.8418	11.6116		97.1972	2.8									9.5				52.35	7.27	24.6	8.88	0.66		23.75	0.0041			15						#DIV/0!	0	40		DCM	400		34
https://www.sciencedirect.com/science/article/pii/S0306261918316738?via%3Dihub	Hietala	2019	Nan-1	0	43.7437			41.8418	11.6116		97.1972	2.8													15.9	7.3	24	8.8	0.7	0.94	10.7424	0.0013			2.91262						#DIV/0!	0	0		DCM	150	68.8	2.1	28.8
https://www.sciencedirect.com/science/article/pii/S0306261918316738?via%3Dihub	Hietala	2019	Nan-1	0	43.7437			41.8418	11.6116		97.1972	2.8													15.9	7.3	24	8.8	0.7	0.94	10.7424	0.0013			2.91262						#DIV/0!	0	1		DCM	150	68.3	7.3	23
https://www.sciencedirect.com/science/article/pii/S0306261918316738?via%3Dihub	Hietala	2019	Nan-1	0	43.7437			41.8418	11.6116		97.1972	2.8													15.9	7.3	24	8.8	0.7	0.94	10.7424	0.0013			2.91262						#DIV/0!	0	10		DCM	150	59.3	6.5	32.9
https://www.sciencedirect.com/science/article/pii/S0306261918316738?via%3Dihub	Hietala	2019	Nan-1	0	43.7437			41.8418	11.6116		97.1972	2.8													15.9	7.3	24	8.8	0.7	0.94	10.7424	0.0013			2.91262						#DIV/0!	0	100		DCM	150	49.3	6.5	42.5
https://www.sciencedirect.com/science/article/pii/S0306261918316738?via%3Dihub	Hietala	2019	Nan-1	0	43.7437			41.8418	11.6116		97.1972	2.8													15.9	7.3	24	8.8	0.7	0.94	10.7424	0.0013			2.91262						#DIV/0!	0	3.2		DCM	200	47.7	10.7	40.8
https://www.sciencedirect.com/science/article/pii/S0306261918316738?via%3Dihub	Hietala	2019	Nan-1	0	43.7437			41.8418	11.6116		97.1972	2.8													15.9	7.3	24	8.8	0.7	0.94	10.7424	0.0013			2.91262						#DIV/0!	0	31.6		DCM	200	22.1	18.6	57.1
https://www.sciencedirect.com/science/article/pii/S0306261918316738?via%3Dihub	Hietala	2019	Nan-1	0	43.7437			41.8418	11.6116		97.1972	2.8													15.9	7.3	24	8.8	0.7	0.94	10.7424	0.0013			2.91262						#DIV/0!	0	1		DCM	250	38.2	14.5	45.6
https://www.sciencedirect.com/science/article/pii/S0306261918316738?via%3Dihub	Hietala	2019	Nan-1	0	43.7437			41.8418	11.6116		97.1972	2.8													15.9	7.3	24	8.8	0.7	0.94	10.7424	0.0013			2.91262						#DIV/0!	0	10		DCM	250	10.6	25.6	58.5
https://www.sciencedirect.com/science/article/pii/S0306261918316738?via%3Dihub	Hietala	2019	Nan-1	0	43.7437			41.8418	11.6116		97.1972	2.8													15.9	7.3	24	8.8	0.7	0.94	10.7424	0.0013			2.91262						#DIV/0!	0	100		DCM	250	1.7	35.1	60.1
https://www.sciencedirect.com/science/article/pii/S0306261918316738?via%3Dihub	Hietala	2019	Nan-1	0	43.7437			41.8418	11.6116		97.1972	2.8													15.9	7.3	24	8.8	0.7	0.94	10.7424	0.0013			2.91262						#DIV/0!	0	3.2		DCM	300	4.2	29.5	61.4
https://www.sciencedirect.com/science/article/pii/S0306261918316738?via%3Dihub	Hietala	2019	Nan-1	0	43.7437			41.8418	11.6116		97.1972	2.8													15.9	7.3	24	8.8	0.7	0.94	10.7424	0.0013			2.91262						#DIV/0!	0	31.6		DCM	300	1.7	31.7	62.1
https://www.sciencedirect.com/science/article/pii/S0306261918316738?via%3Dihub	Hietala	2019	Nan-1	0	43.7437			41.8418	11.6116		97.1972	2.8													15.9	7.3	24	8.8	0.7	0.94	10.7424	0.0013			2.91262						#DIV/0!	0	1		DCM	350	4	30.6	60.7
https://www.sciencedirect.com/science/article/pii/S0306261918316738?via%3Dihub	Hietala	2019	Nan-1	0	43.7437			41.8418	11.6116		97.1972	2.8													15.9	7.3	24	8.8	0.7	0.94	10.7424	0.0013			2.91262						#DIV/0!	0	10		DCM	350	1.8	30.8	60.1
https://www.sciencedirect.com/science/article/pii/S0306261918316738?via%3Dihub	Hietala	2019	Nan-1	0	43.7437			41.8418	11.6116		97.1972	2.8													15.9	7.3	24	8.8	0.7	0.94	10.7424	0.0013			2.91262						#DIV/0!	0	100		DCM	350	1.9	30.8	50.3
https://www.sciencedirect.com/science/article/pii/S0306261918316738?via%3Dihub	Hietala	2019	Nan-1	0	43.7437			41.8418	11.6116		97.1972	2.8													15.9	7.3	24	8.8	0.7	0.94	10.7424	0.0013			10.7143						#DIV/0!	0	0		DCM	150	74.9	1.8	23.1
https://www.sciencedirect.com/science/article/pii/S0306261918316738?via%3Dihub	Hietala	2019	Nan-1	0	43.7437			41.8418	11.6116		97.1972	2.8													15.9	7.3	24	8.8	0.7	0.94	10.7424	0.0013			10.7143						#DIV/0!	0	1		DCM	150	69.8	6.3	23.6
https://www.sciencedirect.com/science/article/pii/S0306261918316738?via%3Dihub	Hietala	2019	Nan-1	0	43.7437			41.8418	11.6116		97.1972	2.8													15.9	7.3	24	8.8	0.7	0.94	10.7424	0.0013			10.7143						#DIV/0!	0	10		DCM	150	61.7	8.6	29.2
https://www.sciencedirect.com/science/article/pii/S0306261918316738?via%3Dihub	Hietala	2019	Nan-1	0	43.7437			41.8418	11.6116		97.1972	2.8													15.9	7.3	24	8.8	0.7	0.94	10.7424	0.0013			10.7143						#DIV/0!	0	100		DCM	150	50.3	9.8	39.1
https://www.sciencedirect.com/science/article/pii/S0306261918316738?via%3Dihub	Hietala	2019	Nan-1	0	43.7437			41.8418	11.6116		97.1972	2.8													15.9	7.3	24	8.8	0.7	0.94	10.7424	0.0013			10.7143						#DIV/0!	0	3.2		DCM	200	52.5	9.5	37.5
https://www.sciencedirect.com/science/article/pii/S0306261918316738?via%3Dihub	Hietala	2019	Nan-1	0	43.7437			41.8418	11.6116		97.1972	2.8													15.9	7.3	24	8.8	0.7	0.94	10.7424	0.0013			10.7143						#DIV/0!	0	31.6		DCM	200	31.3	16.6	49.4
https://www.sciencedirect.com/science/article/pii/S0306261918316738?via%3Dihub	Hietala	2019	Nan-1	0	43.7437			41.8418	11.6116		97.1972	2.8													15.9	7.3	24	8.8	0.7	0.94	10.7424	0.0013			10.7143						#DIV/0!	0	1		DCM	250	40.1	15.7	43.2
https://www.sciencedirect.com/science/article/pii/S0306261918316738?via%3Dihub	Hietala	2019	Nan-1	0	43.7437			41.8418	11.6116		97.1972	2.8													15.9	7.3	24	8.8	0.7	0.94	10.7424	0.0013			10.7143						#DIV/0!	0	10		DCM	250	9.4	27.9	62.7
https://www.sciencedirect.com/science/article/pii/S0306261918316738?via%3Dihub	Hietala	2019	Nan-1	0	43.7437			41.8418	11.6116		97.1972	2.8													15.9	7.3	24	8.8	0.7	0.94	10.7424	0.0013			10.7143						#DIV/0!	0	100		DCM	250	1.9	36.4	54.2
https://www.sciencedirect.com/science/article/pii/S0306261918316738?via%3Dihub	Hietala	2019	Nan-1	0	43.7437			41.8418	11.6116		97.1972	2.8													15.9	7.3	24	8.8	0.7	0.94	10.7424	0.0013			10.7143						#DIV/0!	0	3.2		DCM	300	6.5	33.9	53.7
https://www.sciencedirect.com/science/article/pii/S0306261918316738?via%3Dihub	Hietala	2019	Nan-1	0	43.7437			41.8418	11.6116		97.1972	2.8													15.9	7.3	24	8.8	0.7	0.94	10.7424	0.0013			10.7143						#DIV/0!	0	31.6		DCM	300	2.1	34	57.4
https://www.sciencedirect.com/science/article/pii/S0306261918316738?via%3Dihub	Hietala	2019	Nan-1	0	43.7437			41.8418	11.6116		97.1972	2.8													15.9	7.3	24	8.8	0.7	0.94	10.7424	0.0013			10.7143						#DIV/0!	0	0		DCM	350	76.1	2.1	21.8
https://www.sciencedirect.com/science/article/pii/S0306261918316738?via%3Dihub	Hietala	2019	Nan-1	0	43.7437			41.8418	11.6116		97.1972	2.8													15.9	7.3	24	8.8	0.7	0.94	10.7424	0.0013			10.7143						#DIV/0!	0	1		DCM	350	5.5	38.1	51.3
https://www.sciencedirect.com/science/article/pii/S0306261918316738?via%3Dihub	Hietala	2019	Nan-1	0	43.7437			41.8418	11.6116		97.1972	2.8													15.9	7.3	24	8.8	0.7	0.94	10.7424	0.0013			10.7143						#DIV/0!	0	10		DCM	350	2.6	39	47.4
https://www.sciencedirect.com/science/article/pii/S0306261918316738?via%3Dihub	Hietala	2019	Nan-1	0	43.7437			41.8418	11.6116		97.1972	2.8													15.9	7.3	24	8.8	0.7	0.94	10.7424	0.0013			10.7143						#DIV/0!	0	100		DCM	350	2.4	34.8	53.2
https://www.sciencedirect.com/science/article/pii/S0306261918316738?via%3Dihub	Hietala	2019	Nan-2	0	44.7			20.1	28.5		93.3	6.7													56.2	8	22.4	4.2	0.51	0.97	26.1524	0.0013			2.91262						#DIV/0!	0	1		DCM	150	45.5	11.6	41.9
https://www.sciencedirect.com/science/article/pii/S0306261918316738?via%3Dihub	Hietala	2019	Nan-2	0	44.7			20.1	28.5		93.3	6.7													56.2	8	22.4	4.2	0.51	0.97	26.1524	0.0013			2.91262						#DIV/0!	0	0		DCM	200	48.6	13.5	36.6
https://www.sciencedirect.com/science/article/pii/S0306261918316738?via%3Dihub	Hietala	2019	Nan-2	0	44.7			20.1	28.5		93.3	6.7													56.2	8	22.4	4.2	0.51	0.97	26.1524	0.0013			2.91262						#DIV/0!	0	3.2		DCM	200	27.8	27.4	43.7
https://www.sciencedirect.com/science/article/pii/S0306261918316738?via%3Dihub	Hietala	2019	Nan-2	0	44.7			20.1	28.5		93.3	6.7													56.2	8	22.4	4.2	0.51	0.97	26.1524	0.0013			2.91262						#DIV/0!	0	31.6		DCM	200	16.4	35.2	45
https://www.sciencedirect.com/science/article/pii/S0306261918316738?via%3Dihub	Hietala	2019	Nan-2	0	44.7			20.1	28.5		93.3	6.7													56.2	8	22.4	4.2	0.51	0.97	26.1524	0.0013			2.91262						#DIV/0!	0	3.2		DCM	300	5.1	42.3	43.9
https://www.sciencedirect.com/science/article/pii/S0306261918316738?via%3Dihub	Hietala	2019	Nan-2	0	44.7			20.1	28.5		93.3	6.7													56.2	8	22.4	4.2	0.51	0.97	26.1524	0.0013			2.91262						#DIV/0!	0	31.6		DCM	300	6.9	40.6	43.5
https://www.sciencedirect.com/science/article/pii/S0306261918316738?via%3Dihub	Hietala	2019	Nan-2	0	44.7			20.1	28.5		93.3	6.7													56.2	8	22.4	4.2	0.51	0.97	26.1524	0.0013			2.91262						#DIV/0!	0	100		DCM	350	2.1	41.2	44.7
https://www.sciencedirect.com/science/article/pii/S0306261918316738?via%3Dihub	Hietala	2019	Nan-2	0	44.7			20.1	28.5		93.3	6.7													56.2	8	22.4	4.2	0.51	0.97	26.1524	0.0013			10.7143						#DIV/0!	0	1		DCM	150	48.7	15	35.8
https://www.sciencedirect.com/science/article/pii/S0306261918316738?via%3Dihub	Hietala	2019	Nan-2	0	44.7			20.1	28.5		93.3	6.7													56.2	8	22.4	4.2	0.51	0.97	26.1524	0.0013			10.7143						#DIV/0!	0	3.2		DCM	200	29.6	28.3	41.3
https://www.sciencedirect.com/science/article/pii/S0306261918316738?via%3Dihub	Hietala	2019	Nan-2	0	44.7			20.1	28.5		93.3	6.7													56.2	8	22.4	4.2	0.51	0.97	26.1524	0.0013			10.7143						#DIV/0!	0	31.6		DCM	200	17.6	33.9	45.8
https://www.sciencedirect.com/science/article/pii/S0306261918316738?via%3Dihub	Hietala	2019	Nan-2	0	44.7			20.1	28.5		93.3	6.7													56.2	8	22.4	4.2	0.51	0.97	26.1524	0.0013			10.7143						#DIV/0!	0	0		DCM	300	45.8	20.3	33.6
https://www.sciencedirect.com/science/article/pii/S0306261918316738?via%3Dihub	Hietala	2019	Nan-2	0	44.7			20.1	28.5		93.3	6.7													56.2	8	22.4	4.2	0.51	0.97	26.1524	0.0013			10.7143						#DIV/0!	0	3.2		DCM	300	9.2	43.1	47.7
https://www.sciencedirect.com/science/article/pii/S0306261918316738?via%3Dihub	Hietala	2019	Nan-2	0	44.7			20.1	28.5		93.3	6.7													56.2	8	22.4	4.2	0.51	0.97	26.1524	0.0013			10.7143						#DIV/0!	0	31.6		DCM	300	4.1	49.4	46.5
https://www.sciencedirect.com/science/article/pii/S0306261918316738?via%3Dihub	Hietala	2019	Nan-2	0	44.7			20.1	28.5		93.3	6.7													56.2	8	22.4	4.2	0.51	0.97	26.1524	0.0013			10.7143						#DIV/0!	0	100		DCM	350	4.5	47.9	47.6
https://www.sciencedirect.com/science/article/pii/S0306261918316738?via%3Dihub	Hietala	2019	Chl-1	0	42.5			43.3	9.4		95.2	4.8													51	7.2	26.5	9.1	0.53	1.03	21.9301	0.0013			2.91262						#DIV/0!	0	0		DCM	200	95.6	0.8	3.3
https://www.sciencedirect.com/science/article/pii/S0306261918316738?via%3Dihub	Hietala	2019	Chl-1	0	42.5			43.3	9.4		95.2	4.8													51	7.2	26.5	9.1	0.53	1.03	21.9301	0.0013			2.91262						#DIV/0!	0	3.2		DCM	200	56.8	4.3	37.7
https://www.sciencedirect.com/science/article/pii/S0306261918316738?via%3Dihub	Hietala	2019	Chl-1	0	42.5			43.3	9.4		95.2	4.8													51	7.2	26.5	9.1	0.53	1.03	21.9301	0.0013			2.91262						#DIV/0!	0	31.6		DCM	200	32.7	5.6	60.1
https://www.sciencedirect.com/science/article/pii/S0306261918316738?via%3Dihub	Hietala	2019	Chl-1	0	42.5			43.3	9.4		95.2	4.8													51	7.2	26.5	9.1	0.53	1.03	21.9301	0.0013			2.91262						#DIV/0!	0	3.2		DCM	300	6.9	28.8	58.3
https://www.sciencedirect.com/science/article/pii/S0306261918316738?via%3Dihub	Hietala	2019	Chl-1	0	42.5			43.3	9.4		95.2	4.8													51	7.2	26.5	9.1	0.53	1.03	21.9301	0.0013			2.91262						#DIV/0!	0	31.6		DCM	300	1.9	34.7	54.4
https://www.sciencedirect.com/science/article/pii/S0306261918316738?via%3Dihub	Hietala	2019	Chl-1	0	42.5			43.3	9.4		95.2	4.8													51	7.2	26.5	9.1	0.53	1.03	21.9301	0.0013			10.7143						#DIV/0!	0	3.2		DCM	200	66.4	2.9	30.4
https://www.sciencedirect.com/science/article/pii/S0306261918316738?via%3Dihub	Hietala	2019	Chl-1	0	42.5			43.3	9.4		95.2	4.8													51	7.2	26.5	9.1	0.53	1.03	21.9301	0.0013			10.7143						#DIV/0!	0	31.6		DCM	200	42.6	4.4	51.7
https://www.sciencedirect.com/science/article/pii/S0306261918316738?via%3Dihub	Hietala	2019	Chl-1	0	42.5			43.3	9.4		95.2	4.8													51	7.2	26.5	9.1	0.53	1.03	21.9301	0.0013			10.7143						#DIV/0!	0	0		DCM	300	89.5	0.8	9.4
https://www.sciencedirect.com/science/article/pii/S0306261918316738?via%3Dihub	Hietala	2019	Chl-1	0	42.5			43.3	9.4		95.2	4.8													51	7.2	26.5	9.1	0.53	1.03	21.9301	0.0013			10.7143						#DIV/0!	0	3.2		DCM	300	7.4	30.5	62.1
https://www.sciencedirect.com/science/article/pii/S0306261918316738?via%3Dihub	Hietala	2019	Chl-1	0	42.5			43.3	9.4		95.2	4.8													51	7.2	26.5	9.1	0.53	1.03	21.9301	0.0013			10.7143						#DIV/0!	0	31.6		DCM	300	2.1	38.2	59.7
https://www.sciencedirect.com/science/article/pii/S0306261918316738?via%3Dihub	Hietala	2019	Chl-2	0	61.962			14.7147	19.9199		96.5966	3.4													49.9	7.5	34.6	3.1	0.22	1.11	21.6111	0.0013			2.91262						#DIV/0!	0	0		DCM	150	87.4		12.6
https://www.sciencedirect.com/science/article/pii/S0306261918316738?via%3Dihub	Hietala	2019	Chl-2	0	61.962			14.7147	19.9199		96.5966	3.4													49.9	7.5	34.6	3.1	0.22	1.11	21.6111	0.0013			2.91262						#DIV/0!	0	1		DCM	150	86.2	1	11.2
https://www.sciencedirect.com/science/article/pii/S0306261918316738?via%3Dihub	Hietala	2019	Chl-2	0	61.962			14.7147	19.9199		96.5966	3.4													49.9	7.5	34.6	3.1	0.22	1.11	21.6111	0.0013			2.91262						#DIV/0!	0	10		DCM	150	69	5.1	25
https://www.sciencedirect.com/science/article/pii/S0306261918316738?via%3Dihub	Hietala	2019	Chl-2	0	61.962			14.7147	19.9199		96.5966	3.4													49.9	7.5	34.6	3.1	0.22	1.11	21.6111	0.0013			2.91262						#DIV/0!	0	100		DCM	150	44.9	20.8	33
https://www.sciencedirect.com/science/article/pii/S0306261918316738?via%3Dihub	Hietala	2019	Chl-2	0	61.962			14.7147	19.9199		96.5966	3.4													49.9	7.5	34.6	3.1	0.22	1.11	21.6111	0.0013			2.91262						#DIV/0!	0	3.2		DCM	200	36.7	20.5	41.7
https://www.sciencedirect.com/science/article/pii/S0306261918316738?via%3Dihub	Hietala	2019	Chl-2	0	61.962			14.7147	19.9199		96.5966	3.4													49.9	7.5	34.6	3.1	0.22	1.11	21.6111	0.0013			2.91262						#DIV/0!	0	31.6		DCM	200	11.6	22.2	65.3
https://www.sciencedirect.com/science/article/pii/S0306261918316738?via%3Dihub	Hietala	2019	Chl-2	0	61.962			14.7147	19.9199		96.5966	3.4													49.9	7.5	34.6	3.1	0.22	1.11	21.6111	0.0013			2.91262						#DIV/0!	0	1		DCM	250	20.2	19.6	57.9
https://www.sciencedirect.com/science/article/pii/S0306261918316738?via%3Dihub	Hietala	2019	Chl-2	0	61.962			14.7147	19.9199		96.5966	3.4													49.9	7.5	34.6	3.1	0.22	1.11	21.6111	0.0013			2.91262						#DIV/0!	0	10		DCM	250	15.8	22.8	55.3
https://www.sciencedirect.com/science/article/pii/S0306261918316738?via%3Dihub	Hietala	2019	Chl-2	0	61.962			14.7147	19.9199		96.5966	3.4													49.9	7.5	34.6	3.1	0.22	1.11	21.6111	0.0013			2.91262						#DIV/0!	0	100		DCM	250	14.9	29.1	45
https://www.sciencedirect.com/science/article/pii/S0306261918316738?via%3Dihub	Hietala	2019	Chl-2	0	61.962			14.7147	19.9199		96.5966	3.4													49.9	7.5	34.6	3.1	0.22	1.11	21.6111	0.0013			2.91262						#DIV/0!	0	3.2		DCM	300	7.5	35	47.5
https://www.sciencedirect.com/science/article/pii/S0306261918316738?via%3Dihub	Hietala	2019	Chl-2	0	61.962			14.7147	19.9199		96.5966	3.4													49.9	7.5	34.6	3.1	0.22	1.11	21.6111	0.0013			2.91262						#DIV/0!	0	31.6		DCM	300	4.7	34.6	47.7
https://www.sciencedirect.com/science/article/pii/S0306261918316738?via%3Dihub	Hietala	2019	Chl-2	0	61.962			14.7147	19.9199		96.5966	3.4													49.9	7.5	34.6	3.1	0.22	1.11	21.6111	0.0013			2.91262						#DIV/0!	0	1		DCM	350	6.9	32.6	47.5
https://www.sciencedirect.com/science/article/pii/S0306261918316738?via%3Dihub	Hietala	2019	Chl-2	0	61.962			14.7147	19.9199		96.5966	3.4													49.9	7.5	34.6	3.1	0.22	1.11	21.6111	0.0013			2.91262						#DIV/0!	0	10		DCM	350	3.6	33.9	49.5
https://www.sciencedirect.com/science/article/pii/S0306261918316738?via%3Dihub	Hietala	2019	Chl-2	0	61.962			14.7147	19.9199		96.5966	3.4													49.9	7.5	34.6	3.1	0.22	1.11	21.6111	0.0013			2.91262						#DIV/0!	0	100		DCM	350	1.6	30.3	52.1
https://www.sciencedirect.com/science/article/pii/S0306261918316738?via%3Dihub	Hietala	2019	Chl-2	0	61.962			14.7147	19.9199		96.5966	3.4													49.9	7.5	34.6	3.1	0.22	1.11	21.6111	0.0013			10.7143						#DIV/0!	0	0		DCM	150	93.1	0.6	6
https://www.sciencedirect.com/science/article/pii/S0306261918316738?via%3Dihub	Hietala	2019	Chl-2	0	61.962			14.7147	19.9199		96.5966	3.4													49.9	7.5	34.6	3.1	0.22	1.11	21.6111	0.0013			10.7143						#DIV/0!	0	1		DCM	150	84.4	1.7	13.3
https://www.sciencedirect.com/science/article/pii/S0306261918316738?via%3Dihub	Hietala	2019	Chl-2	0	61.962			14.7147	19.9199		96.5966	3.4													49.9	7.5	34.6	3.1	0.22	1.11	21.6111	0.0013			10.7143						#DIV/0!	0	10		DCM	150	78.4	3.4	17.9
https://www.sciencedirect.com/science/article/pii/S0306261918316738?via%3Dihub	Hietala	2019	Chl-2	0	61.962			14.7147	19.9199		96.5966	3.4													49.9	7.5	34.6	3.1	0.22	1.11	21.6111	0.0013			10.7143						#DIV/0!	0	100		DCM	150	47.3	13.3	39.2
https://www.sciencedirect.com/science/article/pii/S0306261918316738?via%3Dihub	Hietala	2019	Chl-2	0	61.962			14.7147	19.9199		96.5966	3.4													49.9	7.5	34.6	3.1	0.22	1.11	21.6111	0.0013			10.7143						#DIV/0!	0	3.2		DCM	200	38.9	17.5	43.2
https://www.sciencedirect.com/science/article/pii/S0306261918316738?via%3Dihub	Hietala	2019	Chl-2	0	61.962			14.7147	19.9199		96.5966	3.4													49.9	7.5	34.6	3.1	0.22	1.11	21.6111	0.0013			10.7143						#DIV/0!	0	31.6		DCM	200	29.5	14	54.8
https://www.sciencedirect.com/science/article/pii/S0306261918316738?via%3Dihub	Hietala	2019	Chl-2	0	61.962			14.7147	19.9199		96.5966	3.4													49.9	7.5	34.6	3.1	0.22	1.11	21.6111	0.0013			10.7143						#DIV/0!	0	1		DCM	250	28.8	15.1	55.1
https://www.sciencedirect.com/science/article/pii/S0306261918316738?via%3Dihub	Hietala	2019	Chl-2	0	61.962			14.7147	19.9199		96.5966	3.4													49.9	7.5	34.6	3.1	0.22	1.11	21.6111	0.0013			10.7143						#DIV/0!	0	10		DCM	250	26.5	22.5	51
https://www.sciencedirect.com/science/article/pii/S0306261918316738?via%3Dihub	Hietala	2019	Chl-2	0	61.962			14.7147	19.9199		96.5966	3.4													49.9	7.5	34.6	3.1	0.22	1.11	21.6111	0.0013			10.7143						#DIV/0!	0	100		DCM	250	22.1	25.9	52
https://www.sciencedirect.com/science/article/pii/S0306261918316738?via%3Dihub	Hietala	2019	Chl-2	0	61.962			14.7147	19.9199		96.5966	3.4													49.9	7.5	34.6	3.1	0.22	1.11	21.6111	0.0013			10.7143						#DIV/0!	0	3.2		DCM	300	14.9	33.5	51.6
https://www.sciencedirect.com/science/article/pii/S0306261918316738?via%3Dihub	Hietala	2019	Chl-2	0	61.962			14.7147	19.9199		96.5966	3.4													49.9	7.5	34.6	3.1	0.22	1.11	21.6111	0.0013			10.7143						#DIV/0!	0	31.6		DCM	300	10.4	36.7	52.9
https://www.sciencedirect.com/science/article/pii/S0306261918316738?via%3Dihub	Hietala	2019	Chl-2	0	61.962			14.7147	19.9199		96.5966	3.4													49.9	7.5	34.6	3.1	0.22	1.11	21.6111	0.0013			10.7143						#DIV/0!	0	0		DCM	350	92.9	0.6	6.3
https://www.sciencedirect.com/science/article/pii/S0306261918316738?via%3Dihub	Hietala	2019	Chl-2	0	61.962			14.7147	19.9199		96.5966	3.4													49.9	7.5	34.6	3.1	0.22	1.11	21.6111	0.0013			10.7143						#DIV/0!	0	1		DCM	350	10.3	34	55.7
https://www.sciencedirect.com/science/article/pii/S0306261918316738?via%3Dihub	Hietala	2019	Chl-2	0	61.962			14.7147	19.9199		96.5966	3.4													49.9	7.5	34.6	3.1	0.22	1.11	21.6111	0.0013			10.7143						#DIV/0!	0	10		DCM	350	7	39.4	53.6
https://www.sciencedirect.com/science/article/pii/S0306261918316738?via%3Dihub	Hietala	2019	Chl-2	0	61.962			14.7147	19.9199		96.5966	3.4													49.9	7.5	34.6	3.1	0.22	1.11	21.6111	0.0013			10.7143						#DIV/0!	0	100		DCM	350	6.4	36.4	57.2
https://www.sciencedirect.com/science/article/pii/S0306261918316738?via%3Dihub	Hietala	2019	Spi-1	0	31.4			50.9	5.2		87.5	12.5													45.6	6.7	25.2	10.7	0.69	1.22	19.3778	0.0013			2.91262						#DIV/0!	0	1		DCM	150	42.4	0.9	55.1
https://www.sciencedirect.com/science/article/pii/S0306261918316738?via%3Dihub	Hietala	2019	Spi-1	0	31.4			50.9	5.2		87.5	12.5													45.6	6.7	25.2	10.7	0.69	1.22	19.3778	0.0013			2.91262						#DIV/0!	0	0		DCM	200	30.8	2.2	66
https://www.sciencedirect.com/science/article/pii/S0306261918316738?via%3Dihub	Hietala	2019	Spi-1	0	31.4			50.9	5.2		87.5	12.5													45.6	6.7	25.2	10.7	0.69	1.22	19.3778	0.0013			2.91262						#DIV/0!	0	3.2		DCM	200	30.2	1.1	67.1
https://www.sciencedirect.com/science/article/pii/S0306261918316738?via%3Dihub	Hietala	2019	Spi-1	0	31.4			50.9	5.2		87.5	12.5													45.6	6.7	25.2	10.7	0.69	1.22	19.3778	0.0013			2.91262						#DIV/0!	0	31.6		DCM	200	16.8	8.4	73.4
https://www.sciencedirect.com/science/article/pii/S0306261918316738?via%3Dihub	Hietala	2019	Spi-1	0	31.4			50.9	5.2		87.5	12.5													45.6	6.7	25.2	10.7	0.69	1.22	19.3778	0.0013			2.91262						#DIV/0!	0	3.2		DCM	300	5.1	18.3	71.9
https://www.sciencedirect.com/science/article/pii/S0306261918316738?via%3Dihub	Hietala	2019	Spi-1	0	31.4			50.9	5.2		87.5	12.5													45.6	6.7	25.2	10.7	0.69	1.22	19.3778	0.0013			2.91262						#DIV/0!	0	31.6		DCM	300	2	20.1	72.7
https://www.sciencedirect.com/science/article/pii/S0306261918316738?via%3Dihub	Hietala	2019	Spi-1	0	31.4			50.9	5.2		87.5	12.5													45.6	6.7	25.2	10.7	0.69	1.22	19.3778	0.0013			2.91262						#DIV/0!	0	100		DCM	350	3.9	18.5	66.6
https://www.sciencedirect.com/science/article/pii/S0306261918316738?via%3Dihub	Hietala	2019	Spi-1	0	31.4			50.9	5.2		87.5	12.5													45.6	6.7	25.2	10.7	0.69	1.22	19.3778	0.0013			10.7143						#DIV/0!	0	1		DCM	150	53.3	1.3	45
https://www.sciencedirect.com/science/article/pii/S0306261918316738?via%3Dihub	Hietala	2019	Spi-1	0	31.4			50.9	5.2		87.5	12.5													45.6	6.7	25.2	10.7	0.69	1.22	19.3778	0.0013			10.7143						#DIV/0!	0	3.2		DCM	200	36.5	3.4	59.7
https://www.sciencedirect.com/science/article/pii/S0306261918316738?via%3Dihub	Hietala	2019	Spi-1	0	31.4			50.9	5.2		87.5	12.5													45.6	6.7	25.2	10.7	0.69	1.22	19.3778	0.0013			10.7143						#DIV/0!	0	31.6		DCM	200	23.4	6	69.2
https://www.sciencedirect.com/science/article/pii/S0306261918316738?via%3Dihub	Hietala	2019	Spi-1	0	31.4			50.9	5.2		87.5	12.5													45.6	6.7	25.2	10.7	0.69	1.22	19.3778	0.0013			10.7143						#DIV/0!	0	0		DCM	300	39.9	1	59.1
https://www.sciencedirect.com/science/article/pii/S0306261918316738?via%3Dihub	Hietala	2019	Spi-1	0	31.4			50.9	5.2		87.5	12.5													45.6	6.7	25.2	10.7	0.69	1.22	19.3778	0.0013			10.7143						#DIV/0!	0	3.2		DCM	300	11.3	21.1	61.9
https://www.sciencedirect.com/science/article/pii/S0306261918316738?via%3Dihub	Hietala	2019	Spi-1	0	31.4			50.9	5.2		87.5	12.5													45.6	6.7	25.2	10.7	0.69	1.22	19.3778	0.0013			10.7143						#DIV/0!	0	31.6		DCM	300	8.5	22.6	63.9
https://www.sciencedirect.com/science/article/pii/S0306261918316738?via%3Dihub	Hietala	2019	Mix-m	0	40.6406			40.04	9.60961		90.2903	9.7													46.9	6.9	28	8.4	0.52	1.21	20.0002	0.0013			2.91262						#DIV/0!	0	0		DCM	200	46.4	1	51.9
https://www.sciencedirect.com/science/article/pii/S0306261918316738?via%3Dihub	Hietala	2019	Mix-m	0	40.6406			40.04	9.60961		90.2903	9.7													46.9	6.9	28	8.4	0.52	1.21	20.0002	0.0013			2.91262						#DIV/0!	0	3.2		DCM	200	38.2	3.8	55.7
https://www.sciencedirect.com/science/article/pii/S0306261918316738?via%3Dihub	Hietala	2019	Mix-m	0	40.6406			40.04	9.60961		90.2903	9.7													46.9	6.9	28	8.4	0.52	1.21	20.0002	0.0013			2.91262						#DIV/0!	0	31.6		DCM	200	14.5	11.7	72.6
https://www.sciencedirect.com/science/article/pii/S0306261918316738?via%3Dihub	Hietala	2019	Mix-m	0	40.6406			40.04	9.60961		90.2903	9.7													46.9	6.9	28	8.4	0.52	1.21	20.0002	0.0013			2.91262						#DIV/0!	0	3.2		DCM	300	2.5	21.3	69
https://www.sciencedirect.com/science/article/pii/S0306261918316738?via%3Dihub	Hietala	2019	Mix-m	0	40.6406			40.04	9.60961		90.2903	9.7													46.9	6.9	28	8.4	0.52	1.21	20.0002	0.0013			2.91262						#DIV/0!	0	31.6		DCM	300	2.9	26.3	63.2
https://www.sciencedirect.com/science/article/pii/S0306261918316738?via%3Dihub	Hietala	2019	Mix-m	0	40.6406			40.04	9.60961		90.2903	9.7													46.9	6.9	28	8.4	0.52	1.21	20.0002	0.0013			10.7143						#DIV/0!	0	3.2		DCM	200	44.2	4	51.1
https://www.sciencedirect.com/science/article/pii/S0306261918316738?via%3Dihub	Hietala	2019	Mix-m	0	40.6406			40.04	9.60961		90.2903	9.7													46.9	6.9	28	8.4	0.52	1.21	20.0002	0.0013			10.7143						#DIV/0!	0	31.6		DCM	200	18.9	12.3	68
https://www.sciencedirect.com/science/article/pii/S0306261918316738?via%3Dihub	Hietala	2019	Mix-m	0	40.6406			40.04	9.60961		90.2903	9.7													46.9	6.9	28	8.4	0.52	1.21	20.0002	0.0013			10.7143						#DIV/0!	0	0		DCM	300	52	1.5	46.4
https://www.sciencedirect.com/science/article/pii/S0306261918316738?via%3Dihub	Hietala	2019	Mix-m	0	40.6406			40.04	9.60961		90.2903	9.7													46.9	6.9	28	8.4	0.52	1.21	20.0002	0.0013			10.7143						#DIV/0!	0	3.2		DCM	300	6.6	27.5	58.1
https://www.sciencedirect.com/science/article/pii/S0306261918316738?via%3Dihub	Hietala	2019	Mix-m	0	40.6406			40.04	9.60961		90.2903	9.7													46.9	6.9	28	8.4	0.52	1.21	20.0002	0.0013			10.7143						#DIV/0!	0	31.6		DCM	300	5.1	31.7	55.7
https://www.sciencedirect.com/science/article/pii/S0360544220306575	He	2020	Spirulina platensis	0	22.0276			64.7926	5.34562		92.1659	8.5			10.3	10.8	69.4								46.9	6.9	35.5	10.7			18.5	0.05			10		10	0.104473		30	21.9999	21.9999	60		DCM	300		28.5
https://www.sciencedirect.com/science/article/pii/S0360544220306575	He	2020	Spirulina platensis	0	22.0276			64.7926	5.34562		92.1659	8.5			10.3	10.8	69.4								46.9	6.9	35.5	10.7			18.5	0.05			10		10	0.104473		50	21.9918	21.9918	75		DCM	250		15.9
https://www.sciencedirect.com/science/article/pii/S0360544220306575	He	2020	Spirulina platensis	0	22.0276			64.7926	5.34562		92.1659	8.5			10.3	10.8	69.4								46.9	6.9	35.5	10.7			18.5	0.05			10		10	0.104473		30	21.9999	21.9999	60		DCM	300		26
https://www.sciencedirect.com/science/article/pii/S0360544220306575	He	2020	Spirulina platensis	0	22.0276			64.7926	5.34562		92.1659	8.5			10.3	10.8	69.4								46.9	6.9	35.5	10.7			18.5	0.05			10		10	0.104473		30	21.9876	21.9876	53		DCM	230		12.8
https://www.sciencedirect.com/science/article/pii/S0360544220306575	He	2020	Spirulina platensis	0	22.0276			64.7926	5.34562		92.1659	8.5			10.3	10.8	69.4								46.9	6.9	35.5	10.7			18.5	0.05			10		10	0.104473		30	22.0075	22.0075	67		DCM	370		28
https://www.sciencedirect.com/science/article/pii/S0360544220306575	He	2020	Spirulina platensis	0	22.0276			64.7926	5.34562		92.1659	8.5			10.3	10.8	69.4								46.9	6.9	35.5	10.7			18.5	0.05			10		10	0.104473		30	21.9999	21.9999	60		DCM	300		28.5
https://www.sciencedirect.com/science/article/pii/S0360544220306575	He	2020	Spirulina platensis	0	22.0276			64.7926	5.34562		92.1659	8.5			10.3	10.8	69.4								46.9	6.9	35.5	10.7			18.5	0.05			10		10	0.104473		60	21.9999	21.9999	90		DCM	300		36.7
https://www.sciencedirect.com/science/article/pii/S0360544220306575	He	2020	Spirulina platensis	0	22.0276			64.7926	5.34562		92.1659	8.5			10.3	10.8	69.4								46.9	6.9	35.5	10.7			18.5	0.05			10		10	0.104473		30	21.9999	21.9999	60		DCM	300		29
https://www.sciencedirect.com/science/article/pii/S0360544220306575	He	2020	Spirulina platensis	0	22.0276			64.7926	5.34562		92.1659	8.5			10.3	10.8	69.4								46.9	6.9	35.5	10.7			18.5	0.05			10		10	0.104473		0	21.9999	21.9999	30		DCM	300		6.6
https://www.sciencedirect.com/science/article/pii/S0360544220306575	He	2020	Spirulina platensis	0	22.0276			64.7926	5.34562		92.1659	8.5			10.3	10.8	69.4								46.9	6.9	35.5	10.7			18.5	0.05			10		10	0.104473		10	22.0056	22.0056	45		DCM	350		19.9
https://www.sciencedirect.com/science/article/pii/S0360544220306575	He	2020	Spirulina platensis	0	22.0276			64.7926	5.34562		92.1659	8.5			10.3	10.8	69.4								46.9	6.9	35.5	10.7			18.5	0.05			10		10	0.104473		50	22.0056	22.0056	85		DCM	350		30.1
https://www.sciencedirect.com/science/article/pii/S0360544220306575	He	2020	Spirulina platensis	0	22.0276			64.7926	5.34562		92.1659	8.5			10.3	10.8	69.4								46.9	6.9	35.5	10.7			18.5	0.05			10		10	0.104473		30	21.9999	21.9999	60		DCM	300		28.3
https://www.sciencedirect.com/science/article/pii/S0360544220306575	He	2020	Spirulina platensis	0	22.0276			64.7926	5.34562		92.1659	8.5			10.3	10.8	69.4								46.9	6.9	35.5	10.7			18.5	0.05			10		10	0.104473		10	21.9918	21.9918	35		DCM	250		8.8
https://www.sciencedirect.com/science/article/pii/S0360544220306575	He	2020	Spirulina platensis	0	22.0276			64.7926	5.34562		92.1659	8.5			10.3	10.8	69.4								46.9	6.9	35.5	10.7			18.5	0.05			10		10	0.104473		30	22.0046	22.0046	64		DCM	340		36.7
https://www.sciencedirect.com/science/article/pii/S0360544220306575	He	2020	Spirulina platensis	0	22.0276			64.7926	5.34562		92.1659	8.5			10.3	10.8	69.4								46.9	6.9	35.5	10.7			18.5	0.05			10		10	0.104473		50	21.9999	21.9999	80		DCM	300		35.5
https://www.sciencedirect.com/science/article/pii/S0360544220306575	He	2020	Spirulina platensis	0	22.0276			64.7926	5.34562		92.1659	8.5			10.3	10.8	69.4								46.9	6.9	35.5	10.7			18.5	0.05			10		10	0.104473		40	21.9999	21.9999	70		DCM	300		33.3
https://www.sciencedirect.com/science/article/pii/S0360544220306575	He	2020	Spirulina platensis	0	22.0276			64.7926	5.34562		92.1659	8.5			10.3	10.8	69.4								46.9	6.9	35.5	10.7			18.5	0.05			10		10	0.104473		30	22.0024	22.0024	62		DCM	320		32.4
https://www.sciencedirect.com/science/article/pii/S0360544220306575	He	2020	Spirulina platensis	0	22.0276			64.7926	5.34562		92.1659	8.5			10.3	10.8	69.4								46.9	6.9	35.5	10.7			18.5	0.05			10		10	0.104473		30	22.0066	22.0066	66		DCM	360		36.1
https://www.sciencedirect.com/science/article/pii/S0960852413011917?via%3Dihub	Barreiro	2013	Scenedesmus obliquus	0	26.9			28	16.8		71.7	28.3													44.4	5.4	44.1	5.8	0.3		14.9258	0.043	20		6			1.34613	3.5	5	1.70678	1.70678	8.5		DCM	250	41.6	17.6	27.1
https://www.sciencedirect.com/science/article/pii/S0960852413011917?via%3Dihub	Barreiro	2013	Scenedesmus obliquus	0	26.9			28	16.8		71.7	28.3													44.4	5.4	44.1	5.8	0.3		14.9258	0.043	20		6			0.819073	6	5	2.80712	2.80712	11		DCM	375	4.9	50.6	11.3
https://www.sciencedirect.com/science/article/pii/S0960852413011917?via%3Dihub	Barreiro	2013	Phaeodactylum tricornutum	0	16			37.5	21.9		75.4	24.6													38	4.8	51.3	5.2	0.7		10.9062	0.043	20		6			1.34613	3.5	5	1.70678	1.70678	8.5		DCM	250	17.8	40.8	22.9
https://www.sciencedirect.com/science/article/pii/S0960852413011917?via%3Dihub	Barreiro	2013	Phaeodactylum tricornutum	0	16			37.5	21.9		75.4	24.6													38	4.8	51.3	5.2	0.7		10.9062	0.043	20		6			0.819073	6	5	2.80712	2.80712	11		DCM	375	6.7	54.3	12.6
https://www.sciencedirect.com/science/article/pii/S0960852413011917?via%3Dihub	Barreiro	2013	Nannochloropsis gaditana	0	19.2			43.9	25.1		88.2	11.8													51	6.6	35.1	6.9	0.4		20.0709	0.043	20		6			1.34613	3.5	5	1.70678	1.70678	8.5		DCM	250	24.7	34.4	26.2
https://www.sciencedirect.com/science/article/pii/S0960852413011917?via%3Dihub	Barreiro	2013	Nannochloropsis gaditana	0	19.2			43.9	25.1		88.2	11.8													51	6.6	35.1	6.9	0.4		20.0709	0.043	20		6			0.819073	6	5	2.80712	2.80712	11		DCM	375	6.1	54.3	18.9
https://www.sciencedirect.com/science/article/pii/S0960852413011917?via%3Dihub	Barreiro	2013	Scenedesmus almeriensis	0	14.5			51.7	21.8		88	12													50.6	6.4	35.8	6.8	0.4		19.559	0.043	20		6			1.34613	3.5	5	1.70678	1.70678	8.5		DCM	250	36.6	35.7	17.5
https://www.sciencedirect.com/science/article/pii/S0960852413011917?via%3Dihub	Barreiro	2013	Scenedesmus almeriensis	0	14.5			51.7	21.8		88	12													50.6	6.4	35.8	6.8	0.4		19.559	0.043	20		6			0.819073	6	5	2.80712	2.80712	11		DCM	375	2.5	58.1	12.8
https://www.sciencedirect.com/science/article/pii/S0960852413011917?via%3Dihub	Barreiro	2013	Tetraselmis suecica	0	21			43.6	19.5		84.1	15.9													45	5.9	41.7	6.3	1.1		16.1354	0.043	20		6			1.34613	3.5	5	1.70678	1.70678	8.5		DCM	250	21.1	29.4	28
https://www.sciencedirect.com/science/article/pii/S0960852413011917?via%3Dihub	Barreiro	2013	Tetraselmis suecica	0	21			43.6	19.5		84.1	15.9													45	5.9	41.7	6.3	1.1		16.1354	0.043	20		6			0.819073	6	5	2.80712	2.80712	11		DCM	375	3.9	45.6	15.2
https://www.sciencedirect.com/science/article/pii/S0960852413011917?via%3Dihub	Barreiro	2013	Chlorella vulgaris	0	16.1			41.2	20.4		77.7	22.3													42.3	5.1	46	6.2	0.4		13.4448	0.043	20		6			1.34613	3.5	5	1.70678	1.70678	8.5		DCM	250	27	33	29.9
https://www.sciencedirect.com/science/article/pii/S0960852413011917?via%3Dihub	Barreiro	2013	Chlorella vulgaris	0	16.1			41.2	20.4		77.7	22.3													42.3	5.1	46	6.2	0.4		13.4448	0.043	20		6			0.819073	6	5	2.80712	2.80712	11		DCM	375	3.9	55.3	16.8
https://www.sciencedirect.com/science/article/pii/S0960852413011917?via%3Dihub	Barreiro	2013	Porphyridium purpureum	0	32.5			45.6	12.1		90.2	9.8													45.6	6.1	41.2	6	1.1		16.7415	0.043	20		6			1.34613	3.5	5	1.70678	1.70678	8.5		DCM	250	27.6	24.7	34
https://www.sciencedirect.com/science/article/pii/S0960852413011917?via%3Dihub	Barreiro	2013	Porphyridium purpureum	0	32.5			45.6	12.1		90.2	9.8													45.6	6.1	41.2	6	1.1		16.7415	0.043	20		6			0.819073	6	5	2.80712	2.80712	11		DCM	375	2.9	47.1	16.2
https://www.sciencedirect.com/science/article/pii/S0960852413011917?via%3Dihub	Barreiro	2013	Dunaliella tertiolecta	0	19.4			50.8	23.4		93.6	6.4													51.9	7.5	31.5	8.6	0.5		21.961	0.043	20		6			1.34613	3.5	5	1.70678	1.70678	8.5		DCM	250	11.9	44.8	28.3
https://www.sciencedirect.com/science/article/pii/S0960852413011917?via%3Dihub	Barreiro	2013	Dunaliella tertiolecta	0	19.4			50.8	23.4		93.6	6.4													51.9	7.5	31.5	8.6	0.5		21.961	0.043	20		6			0.819073	6	5	2.80712	2.80712	11		DCM	375	5.7	55.3	17.5
https://www.sciencedirect.com/science/article/pii/S2211926414000708?via%3Dihub	Neveux	2014	Derbesia	0	30.3728			27.4123	12.1711		69.9561	27.4			8.8										36.1	5.8	29.4	5.2	1.9		16.5	0.035	2	28	6.6			1.54772	3	5	1.48532	1.48532	8		DCM	337.5	14.1
https://www.sciencedirect.com/science/article/pii/S2211926414000708?via%3Dihub	Neveux	2014	Derbesia	0	46.0369			36.3735	12.1607		94.5711	5			8										48	7.3	33.3	7	1		21.9	0.035	2	28	6.6			1.54772	3	5	1.48532	1.48532	8		DCM	337.5	9.5
https://www.sciencedirect.com/science/article/pii/S2211926414000708?via%3Dihub	Neveux	2014	Derbesia	0	61.0503			8.64333	5.36105		75.0547	22.8			8.7										34	5.7	38.9	1.6	1.6		14.7	0.035	2	28	6.6			1.54772	3	5	1.48532	1.48532	8		DCM	337.5	10
https://www.sciencedirect.com/science/article/pii/S2211926414000708?via%3Dihub	Neveux	2014	Derbesia	0	82.4236			7.86026	6.00437		96.2882	3.4			8.3										42.9	6.8	45.5	1.5	0.4		18.2	0.035	2	28	6.6			1.54772	3	5	1.48532	1.48532	8		DCM	337.5	9.2
https://www.sciencedirect.com/science/article/pii/S2211926414000708?via%3Dihub	Neveux	2014	Ulva	0	45.5682			20.6818	2.38636		68.6364	27.6			11.9										31.1	5.5	42.1	4	4.9		13.5	0.035	2	28	6.6			1.54772	3	5	1.48532	1.48532	8		DCM	337.5	15.5
https://www.sciencedirect.com/science/article/pii/S2211926414000708?via%3Dihub	Neveux	2014	Ulva	0	57.4586			23.2044	2.32044		82.9834	15.4			9.5										35.9	6.1	45.1	4.6	4.7		15.5	0.035	2	28	6.6			1.54772	3	5	1.48532	1.48532	8		DCM	337.5	20.2
https://www.sciencedirect.com/science/article/pii/S2211926414000708?via%3Dihub	Neveux	2014	Ulva	0	63.5535			5.46697	1.36674		70.3872	26			12.2										30.5	5.5	49.2	1	5.2		12.6	0.035	2	28	6.6			1.54772	3	5	1.48532	1.48532	8		DCM	337.5	8.3
https://www.sciencedirect.com/science/article/pii/S2211926414000708?via%3Dihub	Neveux	2014	Ulva	0	76.3982			5.36913	1.566		83.3333	14.9			10.6										33.1	5.9	53.3	1.1	5.4		13.6	0.035	2	28	6.6			1.54772	3	5	1.48532	1.48532	8		DCM	337.5	9.3
https://www.sciencedirect.com/science/article/pii/S2211926414000708?via%3Dihub	Neveux	2014	Oedogonium	0	63.3333			21.1828	7.95699		92.4731	7			7										44.1	6.7	38.8	4.2	0.2		19.2	0.035	2	28	6.6			1.54772	3	5	1.48532	1.48532	8		DCM	337.5	6.5
https://www.sciencedirect.com/science/article/pii/S2211926414000708?via%3Dihub	Neveux	2014	Oedogonium	0	62.2845			21.3362	9.15948		92.7802	6.7			7.2										44.4	6.7	39.2	4.2	0.2		19.3	0.035	2	28	6.6			1.54772	3	5	1.48532	1.48532	8		DCM	337.5	7.3
https://www.sciencedirect.com/science/article/pii/S2211926414000708?via%3Dihub	Neveux	2014	Oedogonium	0	82.2771			7.19656	3.32975		92.8034	6.7			6.9										41.2	6.4	46.6	1.4	0.2		17.1	0.035	2	28	6.6			1.54772	3	5	1.48532	1.48532	8		DCM	337.5	4
https://www.sciencedirect.com/science/article/pii/S2211926414000708?via%3Dihub	Neveux	2014	Oedogonium	0	84.8156			5.09761	3.47072		93.3839	6.1			7.8										41	6.4	46.9	1	0.1		17	0.035	2	28	6.6			1.54772	3	5	1.48532	1.48532	8		DCM	337.5	3.8
https://www.sciencedirect.com/science/article/pii/S0360544218308648	Duan	2018	AuP	0	19.08			55.06	20.7		94.84	5.16				20.3	74.54								53.52	7.45	22.61	8.81	0.67	0.45	23.7712	0.5	60	200	23.0769	16.5		0.104637	50	60	21.9711	21.9711	110		DCM	350	4.6	46.42	25.25
https://www.sciencedirect.com/science/article/pii/S0360544218308648	Duan	2018	ArP	0	15.28			67.44	6.2		88.92	11.08				22.29	66.63								47.49	6.63	22.48	10.79	0.56	2.49	20.3172	0.5	60	200	23.0769	16.5		0.104637	50	60	21.9711	21.9711	110		DCM	350	9.93	35.2	27.7
https://www.sciencedirect.com/science/article/pii/S0360544218308648	Duan	2018	SL	0	33.75			15.13	41.6		90.48	9.52				10.82	79.66								61.31	8.65	16.96	2.42	0.74	0.18	29.8851	0.5	60	200	23.0769	16.5		0.104637	50	60	21.9711	21.9711	110		DCM	350	19.38	52.68	15.47
https://www.sciencedirect.com/science/article/pii/S0360544218308648	Duan	2018	NO	0	27.65			41.19	21.3		90.14	9.86				16.18	73.97								51.01	7.36	21.7	6.59	0.67	0.1	23.2643	0.5	60	200	23.0769	16.5		0.104637	50	60	21.9711	21.9711	110		DCM	350	8.48	44.53	28.67
https://www.sciencedirect.com/science/article/pii/S0360544218308648	Duan	2018	UP	0	41.88			22.69	3.2		67.77	32.23				19.7	48.07								31.04	4.62	23.55	3.63	1.5	0.73	12.8196	0.5	60	200	23.0769	16.5		0.104637	50	60	21.9711	21.9711	110		DCM	350	24.7	14.86	25.33
https://www.sciencedirect.com/science/article/pii/S0360544218308648	Duan	2018	SJ	0	34.42			13.31	2.7		50.43	49.57				11.05	39.38								23.7	3.43	18.52	2.13	0.11	1.71	9.65946	0.5	60	200	23.0769	16.5		0.104637	50	60	21.9711	21.9711	110		DCM	350	9.83	9.72	52.33
https://www.sciencedirect.com/science/article/pii/S0360544218308648	Duan	2018	ZM	0	61.69			7.75	1.1		70.54	29.46				20.28	50.26								32.75	4.25	28.81	1.24	1.01	0.03	12.4025	0.5	60	200	23.0769	16.5		0.104637	50	60	21.9711	21.9711	110		DCM	350	19.57	14.7	23.23
https://www.sciencedirect.com/science/article/pii/S0360544218308648	Duan	2018	GEH	0	60.16			15.19	0.4		75.75	24.25				17.42	58.33								31.23	4.62	33.35	2.43	5.5	0.07	11.5481	0.5	60	200	23.0769	16.5		0.104637	50	60	21.9711	21.9711	110		DCM	350	25.97	1.95	27.15
https://pubs.acs.org/doi/10.1021/ef201373m	Jena	2011	S. platensis	0	30.6919			49.1314	13.5121		93.3354	6.56			4.54	15.24	79.14								51.78	5.07	11.5	20.13	11.52		20.52	1.8	150	600	20		3.3	0.0431		60	53.3409	53.3409	166.061		DCM	350	6.61082	40.7088	31.9523
https://www.sciencedirect.com/science/article/pii/S1359511317315854?via%3Dihub	Huang	2018	Spirulina	0	19.6939			66.7347	7.55102		93.9796	5.9													44.95	7.03	38.11	9.91			17.7561	0.03			11					10	#DIV/0!	0			DCM	150		35.2019
https://www.sciencedirect.com/science/article/pii/S1359511317315854?via%3Dihub	Huang	2018	Spirulina	0	19.6939			66.7347	7.55102		93.9796	5.9													44.95	7.03	38.11	9.91			17.7561	0.03			11					20	#DIV/0!	0			DCM	150		37.7197
https://www.sciencedirect.com/science/article/pii/S1359511317315854?via%3Dihub	Huang	2018	Spirulina	0	19.6939			66.7347	7.55102		93.9796	5.9													44.95	7.03	38.11	9.91			17.7561	0.03			11					30	#DIV/0!	0			DCM	150		39.1449
https://www.sciencedirect.com/science/article/pii/S1359511317315854?via%3Dihub	Huang	2018	Spirulina	0	19.6939			66.7347	7.55102		93.9796	5.9													44.95	7.03	38.11	9.91			17.7561	0.03			11					40	#DIV/0!	0			DCM	150		33.4442
https://www.sciencedirect.com/science/article/pii/S1359511317315854?via%3Dihub	Huang	2018	Spirulina	0	19.6939			66.7347	7.55102		93.9796	5.9													44.95	7.03	38.11	9.91			17.7561	0.03			11					50	#DIV/0!	0			DCM	150		30.4513
https://www.sciencedirect.com/science/article/pii/S1359511317315854?via%3Dihub	Huang	2018	Spirulina	0	19.6939			66.7347	7.55102		93.9796	5.9													44.95	7.03	38.11	9.91			17.7561	0.03			11					10	#DIV/0!	0			DCM	175		34.6318
https://www.sciencedirect.com/science/article/pii/S1359511317315854?via%3Dihub	Huang	2018	Spirulina	0	19.6939			66.7347	7.55102		93.9796	5.9													44.95	7.03	38.11	9.91			17.7561	0.03			11					20	#DIV/0!	0			DCM	175		33.7767
https://www.sciencedirect.com/science/article/pii/S1359511317315854?via%3Dihub	Huang	2018	Spirulina	0	19.6939			66.7347	7.55102		93.9796	5.9													44.95	7.03	38.11	9.91			17.7561	0.03			11					30	#DIV/0!	0			DCM	175		30.1663
https://www.sciencedirect.com/science/article/pii/S1359511317315854?via%3Dihub	Huang	2018	Spirulina	0	19.6939			66.7347	7.55102		93.9796	5.9													44.95	7.03	38.11	9.91			17.7561	0.03			11					40	#DIV/0!	0			DCM	175		28.8836
https://www.sciencedirect.com/science/article/pii/S1359511317315854?via%3Dihub	Huang	2018	Spirulina	0	19.6939			66.7347	7.55102		93.9796	5.9													44.95	7.03	38.11	9.91			17.7561	0.03			11					50	#DIV/0!	0			DCM	175		31.0689
https://www.sciencedirect.com/science/article/pii/S1359511317315854?via%3Dihub	Huang	2018	Spirulina	0	19.6939			66.7347	7.55102		93.9796	5.9													44.95	7.03	38.11	9.91			17.7561	0.03			11					10	#DIV/0!	0			DCM	200		37.2922
https://www.sciencedirect.com/science/article/pii/S1359511317315854?via%3Dihub	Huang	2018	Spirulina	0	19.6939			66.7347	7.55102		93.9796	5.9													44.95	7.03	38.11	9.91			17.7561	0.03			11					20	#DIV/0!	0			DCM	200		34.3943
https://www.sciencedirect.com/science/article/pii/S1359511317315854?via%3Dihub	Huang	2018	Spirulina	0	19.6939			66.7347	7.55102		93.9796	5.9													44.95	7.03	38.11	9.91			17.7561	0.03			11					30	#DIV/0!	0			DCM	200		28.5511
https://www.sciencedirect.com/science/article/pii/S1359511317315854?via%3Dihub	Huang	2018	Spirulina	0	19.6939			66.7347	7.55102		93.9796	5.9													44.95	7.03	38.11	9.91			17.7561	0.03			11					40	#DIV/0!	0			DCM	200		28.8361
https://www.sciencedirect.com/science/article/pii/S1359511317315854?via%3Dihub	Huang	2018	Spirulina	0	19.6939			66.7347	7.55102		93.9796	5.9													44.95	7.03	38.11	9.91			17.7561	0.03			11					50	#DIV/0!	0			DCM	200		26.6033
https://www.sciencedirect.com/science/article/pii/S1359511317315854?via%3Dihub	Huang	2018	Spirulina	0	19.6939			66.7347	7.55102		93.9796	5.9													44.95	7.03	38.11	9.91			17.7561	0.03			11					10	#DIV/0!	0			DCM	225		34.2043
https://www.sciencedirect.com/science/article/pii/S1359511317315854?via%3Dihub	Huang	2018	Spirulina	0	19.6939			66.7347	7.55102		93.9796	5.9													44.95	7.03	38.11	9.91			17.7561	0.03			11					20	#DIV/0!	0			DCM	225		31.3539
https://www.sciencedirect.com/science/article/pii/S1359511317315854?via%3Dihub	Huang	2018	Spirulina	0	19.6939			66.7347	7.55102		93.9796	5.9													44.95	7.03	38.11	9.91			17.7561	0.03			11					30	#DIV/0!	0			DCM	225		29.3587
https://www.sciencedirect.com/science/article/pii/S1359511317315854?via%3Dihub	Huang	2018	Spirulina	0	19.6939			66.7347	7.55102		93.9796	5.9													44.95	7.03	38.11	9.91			17.7561	0.03			11					40	#DIV/0!	0			DCM	225		28.0285
https://www.sciencedirect.com/science/article/pii/S1359511317315854?via%3Dihub	Huang	2018	Spirulina	0	19.6939			66.7347	7.55102		93.9796	5.9													44.95	7.03	38.11	9.91			17.7561	0.03			11					50	#DIV/0!	0			DCM	225		26.6033
https://www.sciencedirect.com/science/article/pii/S0306261915008491?via%3Dihub	Yoo	2015	N. oceanica	0	24.4098			36.3145	30.2121		90.9364	9.06													52.4	7.88	25	5.81	0.814		25.3	0.042	5	15	25		3.3	0.0431		60	53.2779	53.2779	120.606		DCM	200	12.5568	32.1023
https://www.sciencedirect.com/science/article/pii/S0306261915008491?via%3Dihub	Yoo	2015	N. oceanica	0	24.4098			36.3145	30.2121		90.9364	9.06													52.4	7.88	25	5.81	0.814		25.3	0.042	5	15	25		3.3	0.0431		60	53.3074	53.3074	135.758		DCM	250	6.53409	38.4659
https://www.sciencedirect.com/science/article/pii/S0306261915008491?via%3Dihub	Yoo	2015	N. oceanica	0	24.4098			36.3145	30.2121		90.9364	9.06													52.4	7.88	25	5.81	0.814		25.3	0.042	5	15	25		3.3	0.0431		60	53.327	53.327	150.909		DCM	300	3.57955	40.7386
https://www.sciencedirect.com/science/article/pii/S0306261915008491?via%3Dihub	Yoo	2015	N. oceanica	0	24.4098			36.3145	30.2121		90.9364	9.06													52.4	7.88	25	5.81	0.814		25.3	0.042	5	15	25		3.3	0.0431		60	53.3409	53.3409	166.061		DCM	350	2.78409	40.2841
https://www.sciencedirect.com/science/article/pii/S0306261915008491?via%3Dihub	Yoo	2015	Golenkinia sp	0	26.7			45.1	17.3		89.1	10.9													46.6	7.01	28.9	7.21	0.471		21.8	0.042	5	15	25		3.3	0.0431		60	53.2779	53.2779	120.606		DCM	200	28.0682	12.6705
https://www.sciencedirect.com/science/article/pii/S0306261915008491?via%3Dihub	Yoo	2015	Golenkinia sp	0	26.7			45.1	17.3		89.1	10.9													46.6	7.01	28.9	7.21	0.471		21.8	0.042	5	15	25		3.3	0.0431		60	53.3074	53.3074	135.758		DCM	250	18.4659	22.2727
https://www.sciencedirect.com/science/article/pii/S0306261915008491?via%3Dihub	Yoo	2015	Golenkinia sp	0	26.7			45.1	17.3		89.1	10.9													46.6	7.01	28.9	7.21	0.471		21.8	0.042	5	15	25		3.3	0.0431		60	53.327	53.327	150.909		DCM	300	9.20455	31.3636
https://www.sciencedirect.com/science/article/pii/S0306261915008491?via%3Dihub	Yoo	2015	Golenkinia sp	0	26.7			45.1	17.3		89.1	10.9													46.6	7.01	28.9	7.21	0.471		21.8	0.042	5	15	25		3.3	0.0431		60	53.3409	53.3409	166.061		DCM	350	8.125	29.6591
https://www.sciencedirect.com/science/article/pii/S0196890419313184?via%3Dihub	Mishra	2020	Monoraphidium sp. KMC4	0	26.6796			38.6563	28.1013		93.4372	6.74			4	15.26	74								47.91	7.81	30.55	6.8	0.17		21.38	0.1			10	6	5	0.0651		25	35.2997	35.2997	30		DCM	275	14.1939	12.3014	60.1402
https://www.sciencedirect.com/science/article/pii/S0196890419313184?via%3Dihub	Mishra	2020	Monoraphidium sp. KMC4	0	26.6796			38.6563	28.1013		93.4372	6.74			4	15.26	74								47.91	7.81	30.55	6.8	0.17		21.38	0.1			10	8.5	5	0.0651		30	35.3056	35.3056	30		DCM	300	11.8808	25.1285	50.257
https://www.sciencedirect.com/science/article/pii/S0196890419313184?via%3Dihub	Mishra	2020	Monoraphidium sp. KMC4	0	26.6796			38.6563	28.1013		93.4372	6.74			4	15.26	74								47.91	7.81	30.55	6.8	0.17		21.38	0.1			10	12	5	0.0651		35	35.3105	35.3105	30		DCM	325	7.99065	33.1192	45.1051
https://www.sciencedirect.com/science/article/pii/S0196890419313184?via%3Dihub	Mishra	2020	Monoraphidium sp. KMC4	0	26.6796			38.6563	28.1013		93.4372	6.74			4	15.26	74								47.91	7.81	30.55	6.8	0.17		21.38	0.1			10	16.5	5	0.0651		40	35.3148	35.3148	30		DCM	350	8.51636	32.278	43.528
https://link.springer.com/article/10.1134/S0018151X18060263	Vlaskin	2018	Arthrospira platensis	0	8.26542			70.6636	14.0861		93.0151	6													49.86	7.29	27.56	11.3	3.99		21.194		30	150	16.6667	36.1			120	60	#DIV/0!	0	180		DCM	240		12.4
https://link.springer.com/article/10.1134/S0018151X18060263	Vlaskin	2018	Arthrospira platensis	0	8.26542			70.6636	14.0861		93.0151	6													49.86	7.29	27.56	11.3	3.99		21.194		30	150	16.6667	75			120	60	#DIV/0!	0	180		DCM	280		26.5
https://link.springer.com/article/10.1134/S0018151X18060263	Vlaskin	2018	Arthrospira platensis	0	8.26542			70.6636	14.0861		93.0151	6													49.86	7.29	27.56	11.3	3.99		21.194		30	150	16.6667	135.3			120	60	#DIV/0!	0	180		DCM	330		37.2
https://link.springer.com/article/10.1007/s13762-019-02364-w	Das	2019	Chlorocystis sp. Outdoor	0	31.2407			27.6703	8.92591		67.837	30.0695													32.33	5.67	28.79	3.41			13.87	0.5	45	255	15		14	0.179			12.842	12.842	30		DCM	325	18.03	34.8
https://link.springer.com/article/10.1007/s13762-019-02364-w	Das	2019	Picochlorum sp. Outdoor	0	31.9323			31.0251	18.8691		81.8264	16.7177													44.02	5.63	30.87	2.9			17.41	0.5	45	255	15		14	0.179			12.842	12.842	30		DCM	325	12.15	39.6
https://www.sciencedirect.com/science/article/pii/S0016236115006572?via%3Dihub	Biller	2015	Chlorella	0	33.5793			42.2509	13.3764		89.2066	11.7			4.4										56.2	6.9	28.7	7.7	0.6		19.9	0.098			10				1.4		#DIV/0!	0	5.8	10	DCM	350
https://www.sciencedirect.com/science/article/pii/S0016236115006572?via%3Dihub	Biller	2015	Chlorella	0	33.5793			42.2509	13.3764		89.2066	11.7			4.4										56.2	6.9	28.7	7.7	0.6		19.9	0.098			10				0.35		#DIV/0!	0	1.4	40	DCM	350
https://www.sciencedirect.com/science/article/pii/S0961953418303179?via%3Dihub	Dandamudi	2019	Kirchneriella sp.	0	36.0528			38.2866	17.1888		91.5282	6.22			70.21										51.54	5.96	35.5	5.88	1.11		19.73	0.1			10	9					#DIV/0!	0	30		DCM	200	38.1818	35.8741	19.0909
https://www.sciencedirect.com/science/article/pii/S0961953418303179?via%3Dihub	Dandamudi	2019	Kirchneriella sp.	0	36.0528			38.2866	17.1888		91.5282	6.22			70.21										51.54	5.96	35.5	5.88	1.11		19.73	0.1			10	9					#DIV/0!	0	30		DCM	250	25.1748	39.8601	13.8462
https://www.sciencedirect.com/science/article/pii/S0961953418303179?via%3Dihub	Dandamudi	2019	Kirchneriella sp.	0	36.0528			38.2866	17.1888		91.5282	6.22			70.21										51.54	5.96	35.5	5.88	1.11		19.73	0.1			10	9					#DIV/0!	0	30		DCM	300	12.3776	48.6713	28.3217
https://www.sciencedirect.com/science/article/pii/S0961953418303179?via%3Dihub	Dandamudi	2019	Kirchneriella sp.	0	36.0528			38.2866	17.1888		91.5282	6.22			70.21										51.54	5.96	35.5	5.88	1.11		19.73	0.1			10	9					#DIV/0!	0	30		DCM	325	9.23077	39.6503	17.6224
https://www.sciencedirect.com/science/article/pii/S0961953418303179?via%3Dihub	Dandamudi	2019	Kirchneriella sp.	0	36.0528			38.2866	17.1888		91.5282	6.22			70.21										51.54	5.96	35.5	5.88	1.11		19.73	0.1			10	9					#DIV/0!	0	30		DCM	350	8.39161	33.986	15.9441
https://www.sciencedirect.com/science/article/pii/S0961953418303179?via%3Dihub	Dandamudi	2019	Kirchneriella sp.	0	36.0528			38.2866	17.1888		91.5282	6.22			70.21										51.54	5.96	35.5	5.88	1.11		19.73	0.1			10	9					#DIV/0!	0	30		DCM	375	9.86014	33.986	4.61538
https://www.sciencedirect.com/science/article/pii/S2211926418307756?via%3Dihub	Han	2019	Tetraselmis sp.	0	38.8932			26.6696	16.6685		82.2314	15.99			7.31	6.32	77.69								37.06	5.66	34.55	4			15.33	1.2	30	270	10				1.25	30	#DIV/0!	0	31.25		DCM	275	19.8	26.3	32.1
https://www.sciencedirect.com/science/article/pii/S2211926418307756?via%3Dihub	Han	2019	Tetraselmis sp.	0	38.8932			26.6696	16.6685		82.2314	15.99			7.31	6.32	77.69								37.06	5.66	34.55	4			15.33	1.2	30	270	10	9			1.5	30	#DIV/0!	0	31.5		DCM	300	20.7	27.4	28.4
https://www.sciencedirect.com/science/article/pii/S2211926418307756?via%3Dihub	Han	2019	Tetraselmis sp.	0	38.8932			26.6696	16.6685		82.2314	15.99			7.31	6.32	77.69								37.06	5.66	34.55	4			15.33	1.2	30	270	10				1.75	30	#DIV/0!	0	31.75		DCM	325	20.8	29.9	25.7
https://www.sciencedirect.com/science/article/pii/S2211926418307756?via%3Dihub	Han	2019	Tetraselmis sp.	0	38.8932			26.6696	16.6685		82.2314	15.99			7.31	6.32	77.69								37.06	5.66	34.55	4			15.33	1.2	30	270	10	17			2	30	#DIV/0!	0	32		DCM	350	21.2	31	18.3
https://www.sciencedirect.com/science/article/pii/S0960148119301648	Xu	2019	chlorella	0								16.06			7.16										40.31	5.99	27.74	9.14	0.76		17.31	0.0049	0.2712	2.7		18					#DIV/0!	0	30		DCM	340	17.4026	21.5773
https://www.sciencedirect.com/science/article/pii/S1385894716310506	Vo	2016	Aurantiochytrium sp. KRS101	0	5.8			30	57.5		93.3	6.7								92.5	4.6	2.1										0.0075	1	6	14						#DIV/0!	0	10		DCM	250	27.13	39.53	33.34
https://www.sciencedirect.com/science/article/pii/S1385894716310506	Vo	2016	Aurantiochytrium sp. KRS101	0	5.8			30	57.5		93.3	6.7								92.5	4.6	2.1										0.0075	1	6	14						#DIV/0!	0	20		DCM	250	13.72	44.61	41.67
https://www.sciencedirect.com/science/article/pii/S1385894716310506	Vo	2016	Aurantiochytrium sp. KRS101	0	5.8			30	57.5		93.3	6.7								92.5	4.6	2.1										0.0075	1	6	14						#DIV/0!	0	30		DCM	250	8.66	45.21	45.01
https://www.sciencedirect.com/science/article/pii/S1385894716310506	Vo	2016	Aurantiochytrium sp. KRS101	0	5.8			30	57.5		93.3	6.7								92.5	4.6	2.1										0.0075	1	6	14						#DIV/0!	0	40		DCM	250	4.81	46.09	47.23
https://www.sciencedirect.com/science/article/pii/S1385894716310506	Vo	2016	Aurantiochytrium sp. KRS101	0	5.8			30	57.5		93.3	6.7								92.5	4.6	2.1										0.0075	1	6	14						#DIV/0!	0	60		DCM	250	5.67	45.51	46.12
https://www.sciencedirect.com/science/article/pii/S1385894716310506	Vo	2016	Aurantiochytrium sp. KRS101	0	5.8			30	57.5		93.3	6.7								92.5	4.6	2.1										0.0075	1	6	14						#DIV/0!	0	10		DCM	300	15.36	46.29	37.78
https://www.sciencedirect.com/science/article/pii/S1385894716310506	Vo	2016	Aurantiochytrium sp. KRS101	0	5.8			30	57.5		93.3	6.7								92.5	4.6	2.1										0.0075	1	6	14						#DIV/0!	0	20		DCM	300	7.86	46.93	44.03
https://www.sciencedirect.com/science/article/pii/S1385894716310506	Vo	2016	Aurantiochytrium sp. KRS101	0	5.8			30	57.5		93.3	6.7								92.5	4.6	2.1										0.0075	1	6	14						#DIV/0!	0	30		DCM	300	5.48	48.04	44.18
https://www.sciencedirect.com/science/article/pii/S1385894716310506	Vo	2016	Aurantiochytrium sp. KRS101	0	5.8			30	57.5		93.3	6.7								92.5	4.6	2.1										0.0075	1	6	14						#DIV/0!	0	40		DCM	300	5.41	47.84	43.24
https://www.sciencedirect.com/science/article/pii/S1385894716310506	Vo	2016	Aurantiochytrium sp. KRS101	0	5.8			30	57.5		93.3	6.7								92.5	4.6	2.1										0.0075	1	6	14						#DIV/0!	0	60		DCM	300	6.72	46.35	42.31
https://www.sciencedirect.com/science/article/pii/S1385894716310506	Vo	2016	Aurantiochytrium sp. KRS101	0	5.8			30	57.5		93.3	6.7								92.5	4.6	2.1										0.0075	1	6	14						#DIV/0!	0	10		DCM	350	8.86	50.11	39.39
https://www.sciencedirect.com/science/article/pii/S1385894716310506	Vo	2016	Aurantiochytrium sp. KRS101	0	5.8			30	57.5		93.3	6.7								92.5	4.6	2.1										0.0075	1	6	14						#DIV/0!	0	20		DCM	350	7.78	48.23	41.58
https://www.sciencedirect.com/science/article/pii/S1385894716310506	Vo	2016	Aurantiochytrium sp. KRS101	0	5.8			30	57.5		93.3	6.7								92.5	4.6	2.1										0.0075	1	6	14						#DIV/0!	0	30		DCM	350	4.3	48.5	43.2
https://www.sciencedirect.com/science/article/pii/S1385894716310506	Vo	2016	Aurantiochytrium sp. KRS101	0	5.8			30	57.5		93.3	6.7								92.5	4.6	2.1										0.0075	1	6	14						#DIV/0!	0	40		DCM	350	4.91	46.56	42.2
https://www.sciencedirect.com/science/article/pii/S1385894716310506	Vo	2016	Aurantiochytrium sp. KRS101	0	5.8			30	57.5		93.3	6.7								92.5	4.6	2.1										0.0075	1	6	14						#DIV/0!	0	60		DCM	350	5.33	44.69	40.74
https://www.sciencedirect.com/science/article/pii/S1385894716310506	Vo	2016	Aurantiochytrium sp. KRS101	0	5.8			30	57.5		93.3	6.7								92.5	4.6	2.1										0.0075	1	6	14						#DIV/0!	0	10		DCM	400	4.64	51.22	42.05
https://www.sciencedirect.com/science/article/pii/S1385894716310506	Vo	2016	Aurantiochytrium sp. KRS101	0	5.8			30	57.5		93.3	6.7								92.5	4.6	2.1										0.0075	1	6	14						#DIV/0!	0	20		DCM	400	5.77	48.05	41.38
https://www.sciencedirect.com/science/article/pii/S1385894716310506	Vo	2016	Aurantiochytrium sp. KRS101	0	5.8			30	57.5		93.3	6.7								92.5	4.6	2.1										0.0075	1	6	14						#DIV/0!	0	30		DCM	400	5.07	46.15	42.27
https://www.sciencedirect.com/science/article/pii/S1385894716310506	Vo	2016	Aurantiochytrium sp. KRS101	0	5.8			30	57.5		93.3	6.7								92.5	4.6	2.1										0.0075	1	6	14						#DIV/0!	0	40		DCM	400	6.84	43.44	39.35
https://www.sciencedirect.com/science/article/pii/S1385894716310506	Vo	2016	Aurantiochytrium sp. KRS101	0	5.8			30	57.5		93.3	6.7								92.5	4.6	2.1										0.0075	1	6	14						#DIV/0!	0	60		DCM	400	4.25	44.59	38.56
https://www.sciencedirect.com/science/article/pii/S0960852414005082	Valdez	2014	C. protothecoides	0	29			11	53		93	7								93	2.9	0.88										0.0041			15						#DIV/0!	0	20		DCM	250	8.6	27	64
https://www.sciencedirect.com/science/article/pii/S0960852414005082	Valdez	2014	C. protothecoides	0	29			11	53		93	7								93	2.9	0.88										0.0041			15						#DIV/0!	0	30		DCM	250	18	28	54
https://www.sciencedirect.com/science/article/pii/S0960852414005082	Valdez	2014	C. protothecoides	0	29			11	53		93	7								93	2.9	0.88										0.0041			15						#DIV/0!	0	60		DCM	250	13	23	64
https://www.sciencedirect.com/science/article/pii/S0960852414005082	Valdez	2014	C. protothecoides	0	29			11	53		93	7								93	2.9	0.88										0.0041			15						#DIV/0!	0	90		DCM	250	24	27	49
https://www.sciencedirect.com/science/article/pii/S0960852414005082	Valdez	2014	C. protothecoides	0	29			11	53		93	7								93	2.9	0.88										0.0041			15						#DIV/0!	0	10		DCM	300	16	30	49
https://www.sciencedirect.com/science/article/pii/S0960852414005082	Valdez	2014	C. protothecoides	0	29			11	53		93	7								93	2.9	0.88										0.0041			15						#DIV/0!	0	20		DCM	300	13	43	43
https://www.sciencedirect.com/science/article/pii/S0960852414005082	Valdez	2014	C. protothecoides	0	29			11	53		93	7								93	2.9	0.88										0.0041			15						#DIV/0!	0	40		DCM	300	7.4	46	47
https://www.sciencedirect.com/science/article/pii/S0960852414005082	Valdez	2014	C. protothecoides	0	29			11	53		93	7								93	2.9	0.88										0.0041			15						#DIV/0!	0	60		DCM	300	8.4	46	46
https://www.sciencedirect.com/science/article/pii/S0960852414005082	Valdez	2014	C. protothecoides	0	29			11	53		93	7								93	2.9	0.88										0.0041			15						#DIV/0!	0	10		DCM	350	5.6	44	47
https://www.sciencedirect.com/science/article/pii/S0960852414005082	Valdez	2014	C. protothecoides	0	29			11	53		93	7								93	2.9	0.88										0.0041			15						#DIV/0!	0	20		DCM	350	5	48	44
https://www.sciencedirect.com/science/article/pii/S0960852414005082	Valdez	2014	C. protothecoides	0	29			11	53		93	7								93	2.9	0.88										0.0041			15						#DIV/0!	0	40		DCM	350	5	46	45
https://www.sciencedirect.com/science/article/pii/S0960852414005082	Valdez	2014	C. protothecoides	0	29			11	53		93	7								93	2.9	0.88										0.0041			15						#DIV/0!	0	60		DCM	350	3.9	45	41
https://www.sciencedirect.com/science/article/pii/S0960852414005082	Valdez	2014	C. protothecoides	0	29			11	53		93	7								93	2.9	0.88										0.0041			15						#DIV/0!	0	10		DCM	400	4.1	44	49
https://www.sciencedirect.com/science/article/pii/S0960852414005082	Valdez	2014	C. protothecoides	0	29			11	53		93	7								93	2.9	0.88										0.0041			15						#DIV/0!	0	20		DCM	400	3.3	43	48
https://www.sciencedirect.com/science/article/pii/S0960852414005082	Valdez	2014	C. protothecoides	0	29			11	53		93	7								93	2.9	0.88										0.0041			15						#DIV/0!	0	30		DCM	400	4.1	35	56
https://www.sciencedirect.com/science/article/pii/S0960852414005082	Valdez	2014	C. protothecoides	0	29			11	53		93	7								93	2.9	0.88										0.0041			15						#DIV/0!	0	40		DCM	400	3.1	40	51
https://www.sciencedirect.com/science/article/pii/S0960852414005082	Valdez	2014	Scenedesmus sp.	0	31			50	8		89	11								89	8.2	2.78										0.0041			15						#DIV/0!	0	20		DCM	250	13	29	57
https://www.sciencedirect.com/science/article/pii/S0960852414005082	Valdez	2014	Scenedesmus sp.	0	31			50	8		89	11								89	8.2	2.78										0.0041			15						#DIV/0!	0	30		DCM	250	16	40	43
https://www.sciencedirect.com/science/article/pii/S0960852414005082	Valdez	2014	Scenedesmus sp.	0	31			50	8		89	11								89	8.2	2.78										0.0041			15						#DIV/0!	0	60		DCM	250	16	31	49
https://www.sciencedirect.com/science/article/pii/S0960852414005082	Valdez	2014	Scenedesmus sp.	0	31			50	8		89	11								89	8.2	2.78										0.0041			15						#DIV/0!	0	90		DCM	250	11	38	51
https://www.sciencedirect.com/science/article/pii/S0960852414005082	Valdez	2014	Scenedesmus sp.	0	31			50	8		89	11								89	8.2	2.78										0.0041			15						#DIV/0!	0	10		DCM	300	14	39	48
https://www.sciencedirect.com/science/article/pii/S0960852414005082	Valdez	2014	Scenedesmus sp.	0	31			50	8		89	11								89	8.2	2.78										0.0041			15						#DIV/0!	0	20		DCM	300	15	38	47
https://www.sciencedirect.com/science/article/pii/S0960852414005082	Valdez	2014	Scenedesmus sp.	0	31			50	8		89	11								89	8.2	2.78										0.0041			15						#DIV/0!	0	40		DCM	300	13	41	47
https://www.sciencedirect.com/science/article/pii/S0960852414005082	Valdez	2014	Scenedesmus sp.	0	31			50	8		89	11								89	8.2	2.78										0.0041			15						#DIV/0!	0	60		DCM	300	9.5	34	49
https://www.sciencedirect.com/science/article/pii/S0960852414005082	Valdez	2014	Scenedesmus sp.	0	31			50	8		89	11								89	8.2	2.78										0.0041			15						#DIV/0!	0	10		DCM	350	9.6	41	48
https://www.sciencedirect.com/science/article/pii/S0960852414005082	Valdez	2014	Scenedesmus sp.	0	31			50	8		89	11								89	8.2	2.78										0.0041			15						#DIV/0!	0	20		DCM	350	10	35	51
https://www.sciencedirect.com/science/article/pii/S0960852414005082	Valdez	2014	Scenedesmus sp.	0	31			50	8		89	11								89	8.2	2.78										0.0041			15						#DIV/0!	0	40		DCM	350	8.4	37	53
https://www.sciencedirect.com/science/article/pii/S0960852414005082	Valdez	2014	Scenedesmus sp.	0	31			50	8		89	11								89	8.2	2.78										0.0041			15						#DIV/0!	0	60		DCM	350	11	42	44
https://www.sciencedirect.com/science/article/pii/S0960852414005082	Valdez	2014	Scenedesmus sp.	0	31			50	8		89	11								89	8.2	2.78										0.0041			15						#DIV/0!	0	10		DCM	400	6.1	34	52
https://www.sciencedirect.com/science/article/pii/S0960852414005082	Valdez	2014	Scenedesmus sp.	0	31			50	8		89	11								89	8.2	2.78										0.0041			15						#DIV/0!	0	20		DCM	400	11	31	49
https://www.sciencedirect.com/science/article/pii/S0960852414005082	Valdez	2014	Scenedesmus sp.	0	31			50	8		89	11								89	8.2	2.78										0.0041			15						#DIV/0!	0	30		DCM	400	6.3	30	62
https://www.sciencedirect.com/science/article/pii/S0960852414005082	Valdez	2014	Scenedesmus sp.	0	31			50	8		89	11								89	8.2	2.78										0.0041			15						#DIV/0!	0	40		DCM	400	8.1	29	62
https://www.sciencedirect.com/science/article/pii/S0960852417308544	Vo	2017	Tetraselmis sp.	0	18.5			37.5	14		70	30								91.41		6.24	0.96	1.38								0.0075	1	6	14						#DIV/0!	0	10		DCM	250	58.4	20.98	20.62
https://www.sciencedirect.com/science/article/pii/S0960852417308544	Vo	2017	Tetraselmis sp.	0	18.5			37.5	14		70	30								91.41		6.24	0.96	1.38								0.0075	1	6	14						#DIV/0!	0	20		DCM	250	48.92	24.48	24.39
https://www.sciencedirect.com/science/article/pii/S0960852417308544	Vo	2017	Tetraselmis sp.	0	18.5			37.5	14		70	30								91.41		6.24	0.96	1.38								0.0075	1	6	14						#DIV/0!	0	30		DCM	250	40.16	30.71	26.2
https://www.sciencedirect.com/science/article/pii/S0960852417308544	Vo	2017	Tetraselmis sp.	0	18.5			37.5	14		70	30								91.41		6.24	0.96	1.38								0.0075	1	6	14						#DIV/0!	0	40		DCM	250	36.31	34.33	25.35
https://www.sciencedirect.com/science/article/pii/S0960852417308544	Vo	2017	Tetraselmis sp.	0	18.5			37.5	14		70	30								91.41		6.24	0.96	1.38								0.0075	1	6	14						#DIV/0!	0	60		DCM	250	32.59	34.17	27.44
https://www.sciencedirect.com/science/article/pii/S0960852417308544	Vo	2017	Tetraselmis sp.	0	18.5			37.5	14		70	30								91.41		6.24	0.96	1.38								0.0075	1	6	14						#DIV/0!	0	10		DCM	300	50.29	28.22	20.94
https://www.sciencedirect.com/science/article/pii/S0960852417308544	Vo	2017	Tetraselmis sp.	0	18.5			37.5	14		70	30								91.41		6.24	0.96	1.38								0.0075	1	6	14						#DIV/0!	0	20		DCM	300	39.86	33.7	24.6
https://www.sciencedirect.com/science/article/pii/S0960852417308544	Vo	2017	Tetraselmis sp.	0	18.5			37.5	14		70	30								91.41		6.24	0.96	1.38								0.0075	1	6	14						#DIV/0!	0	30		DCM	300	35.87	35.7	24.95
https://www.sciencedirect.com/science/article/pii/S0960852417308544	Vo	2017	Tetraselmis sp.	0	18.5			37.5	14		70	30								91.41		6.24	0.96	1.38								0.0075	1	6	14						#DIV/0!	0	40		DCM	300	31.89	41.59	21.71
https://www.sciencedirect.com/science/article/pii/S0960852417308544	Vo	2017	Tetraselmis sp.	0	18.5			37.5	14		70	30								91.41		6.24	0.96	1.38								0.0075	1	6	14						#DIV/0!	0	60		DCM	300	30.55	40.94	21.49
https://www.sciencedirect.com/science/article/pii/S0960852417308544	Vo	2017	Tetraselmis sp.	0	18.5			37.5	14		70	30								91.41		6.24	0.96	1.38								0.0075	1	6	14						#DIV/0!	0	10		DCM	350	38.69	45.42	15.19
https://www.sciencedirect.com/science/article/pii/S0960852417308544	Vo	2017	Tetraselmis sp.	0	18.5			37.5	14		70	30								91.41		6.24	0.96	1.38								0.0075	1	6	14						#DIV/0!	0	20		DCM	350	34.95	42.37	19.15
https://www.sciencedirect.com/science/article/pii/S0960852417308544	Vo	2017	Tetraselmis sp.	0	18.5			37.5	14		70	30								91.41		6.24	0.96	1.38								0.0075	1	6	14						#DIV/0!	0	30		DCM	350	32.12	44.98	16.3
https://www.sciencedirect.com/science/article/pii/S0960852417308544	Vo	2017	Tetraselmis sp.	0	18.5			37.5	14		70	30								91.41		6.24	0.96	1.38								0.0075	1	6	14						#DIV/0!	0	40		DCM	350	28.4	46.06	16.89
https://www.sciencedirect.com/science/article/pii/S0960852417308544	Vo	2017	Tetraselmis sp.	0	18.5			37.5	14		70	30								91.41		6.24	0.96	1.38								0.0075	1	6	14						#DIV/0!	0	60		DCM	350	29.66	44.15	15.78
https://www.sciencedirect.com/science/article/pii/S2211926415300333	Xu	2015	Nannochloropsis sp	0	20			59	14		93	7													52.56	7.35	30.94	8.58	0.57		22.0578	0.0041	1.237	1.403	14.1			1.33	3	7	1.72857	1.72857	10		DCM	350		38.2	6.4
https://www.sciencedirect.com/science/article/pii/S2211926415300333	Xu	2015	Nannochloropsis sp	0	20			59	14		93	7													52.56	7.35	30.94	8.58	0.57		22.0578	0.0041	1.237	1.403	14.1			1.33	3	27	1.72857	1.72857	30		DCM	350		39.2	4.5
https://www.sciencedirect.com/science/article/pii/S2211926415300333	Xu	2015	Nannochloropsis sp	0	20			59	14		93	7													52.56	7.35	30.94	8.58	0.57		22.0578	0.0041	1.237	1.403	14.1			1.33	3	42	1.72857	1.72857	45		DCM	350		40.1	4.6
https://www.sciencedirect.com/science/article/pii/S2211926415300333	Xu	2015	Nannochloropsis sp	0	20			59	14		93	7													52.56	7.35	30.94	8.58	0.57		22.0578	0.0041	1.237	1.403	14.1			1.33	3	57	1.72857	1.72857	60		DCM	350		40.5	3.6
https://www.sciencedirect.com/science/article/pii/S2211926415300333	Xu	2015	Nannochloropsis sp	0	20			59	14		93	7													52.56	7.35	30.94	8.58	0.57		22.0578	0.0041			8.6			1.33	3	17	1.72857	1.72857	20		DCM	350		29.2	5.6
https://www.sciencedirect.com/science/article/pii/S2211926415300333	Xu	2015	Nannochloropsis sp	0	20			59	14		93	7													52.56	7.35	30.94	8.58	0.57		22.0578	0.0041			11.4			1.33	3	17	1.72857	1.72857	20		DCM	350		38.1	6.6
https://www.sciencedirect.com/science/article/pii/S2211926415300333	Xu	2015	Nannochloropsis sp	0	20			59	14		93	7													52.56	7.35	30.94	8.58	0.57		22.0578	0.0041			16.5			1.33	3	17	1.72857	1.72857	20		DCM	350		41.1	3.7
https://www.sciencedirect.com/science/article/pii/S2211926415300333	Xu	2015	Nannochloropsis sp	0	20			59	14		93	7													52.56	7.35	30.94	8.58	0.57		22.0578	0.0041			18.7			1.33	3	17	1.72857	1.72857	20		DCM	350		44	3
[truncated: 56 more columns]

## Sheet: Biomass
			Biomass
Reference	Author	Year	Species	Processed	Carbs wt%	Other Carbs wt%	Starch wt%	Cellulose wt%	Hemicellulose wt%	Protein wt%	Lipids wt%	Lignin wt%	Ash wt%	Sum wt%	Holocellulose	Extractives	Moisture	Fixed C	Volatile Matter	Neutral detergent fiber	Acid detergent fiber	Solids Biomass	Biocrude Biomass	Aquous Biomass	Light biocrude Biomass	Heavy Biocrude Biomass	C%	H%	O%	N%	S%	P%	HHV Biomass	Reactor	Solids (g)	Water mL	Solid content (w/w) %	Heating rate C/min	Cooling Rate C/min	Time to reach temp min	b	b_cool	Pressure MPa	Holding Time (min)	T-5	Heating time	Total time (min)	Temperature (C)	Flow rate kg/h
https://www.sciencedirect.com/science/article/pii/S0960852411008686	Vardon	2011	Swine manure	1	37	37				25	22	3	16	87						44	14													2			20						10 12	30	#DIV/0!	0	30	300
https://www.sciencedirect.com/science/article/pii/S0960852411008686	Vardon	2011	digested sludge	1	54	54				42	1	10	31	107						51	36													2			20						10 12	30	#DIV/0!	0	30	300
https://www.sciencedirect.com/science/article/pii/S0306261915014075	Perderson	2016	aspen wood	0	66.78			47.14	19.64			22.11	0.46	88.89		6.63											50.39	6.19	43.23	0.19				10			16.9	300			3.066			30	0.749982	0.749982	30.75	400	9
https://www.sciencedirect.com/science/article/pii/S0306261915014075	Perderson	2016	aspen wood	0	66.78			47.14	19.64			22.11	0.46	88.89		6.63											50.39	6.19	43.23	0.19				10			16.9	300			3.066			30	0.749982	0.749982	30.75	400	14
https://www.sciencedirect.com/science/article/pii/S0306261915014075	Perderson	2016	aspen wood	0	66.78			47.14	19.64			22.11	0.46	88.89		6.63											50.39	6.19	43.23	0.19				10			16.9	300			3.066			30	0.749982	0.749982	30.75	400	14
https://www.sciencedirect.com/science/article/pii/S0306261915014075	Perderson	2016	aspen wood	0	66.78			47.14	19.64			22.11	0.46	88.89		6.63											50.39	6.19	43.23	0.19				10			16.9	300			3.066			30	0.749982	0.749982	30.75	400	14
https://www.sciencedirect.com/science/article/pii/S0960852412000144	Vardon	2012	Scenedesmus	0	25	25				56	13	11	6	105						32	17						52.1	7.4	31.1	8.8	0.48		22.6	0.5			20	50			0.678		10 12	30	3.38996	3.38996	33.39	300
https://www.sciencedirect.com/science/article/pii/S0960852412000144	Vardon	2012	defatted Scenedesmus	1	21	21				72	1	13	7	107						21	16						49.9	7.1	32.1	9.9	0.96		21.3	0.5			20	50			0.678		10 12	30	3.38996	3.38996	33.39	300
https://www.sciencedirect.com/science/article/pii/S096085241301540X	Wang	2013	Litsea cubeba seed	1	12	12				35	41		6	88													59.6	9.3	15.4	1.7			30.2	0.025										60	#DIV/0!	0	60	400
https://www.sciencedirect.com/science/article/pii/S0960852410010096	Biller	2011	Albumin	1						100			5.3	100			8.5										44.6	6.4	36.4	12.6	0.2		23.3	0.075	3	27	10	10			0.145			60	15.8551	15.8551	75.8551	350
https://www.sciencedirect.com/science/article/pii/S0960852410010096	Biller	2011	Soya protein	1						100			3.6	100			5.2										46.9	6.5	33.1	13.6	0		24.2	0.075	3	27	10	10			0.145			60	15.8551	15.8551	75.8551	350
https://www.sciencedirect.com/science/article/pii/S0960852410010096	Biller	2011	Asparagine	1						100				100			5.1										32.2	6.6	42.5	18.7	0		19.3	0.075	3	27	10	10			0.145			60	15.8551	15.8551	75.8551	350
https://www.sciencedirect.com/science/article/pii/S0960852410010096	Biller	2011	Glutamine	1						100				100			4.2										40.5	6.7	33.7	19.1	0		22.3	0.075	3	27	10	10			0.145			60	15.8551	15.8551	75.8551	350
https://www.sciencedirect.com/science/article/pii/S0960852410010096	Biller	2011	Glucose	1	100	100								100			0										34.4	5.9	59.8	0	0		19.2	0.075	3	27	10	10			0.145			60	15.8551	15.8551	75.8551	350
https://www.sciencedirect.com/science/article/pii/S0960852410010096	Biller	2011	Starch	1	100		100						0.1	100			10.3										38.5	6	55.5	0	0		20.7	0.075	3	27	10	10			0.145			60	15.8551	15.8551	75.8551	350
https://www.sciencedirect.com/science/article/pii/S0960852410010096	Biller	2011	Sunflower oil	1							100			100			0										63.2	9.5	27.3	0.1	0		33.6	0.075	3	27	10	10			0.145			60	15.8551	15.8551	75.8551	350
https://www.sciencedirect.com/science/article/pii/S0960852410010096	Bach	2014	Sugar kelp	0									16.58					14.1	69.32								39.44	5.14	52.03	2.99	0.6		14.46	0.0006283			10	585			6.62			15	0.34728	0.34728	15.3473	350
https://www.sciencedirect.com/science/article/pii/S0960852410010096	Bach	2014	Sugar kelp	0									16.58					14.1	69.32								39.44	5.14	52.03	2.99	0.6		14.46	0.0006283			10	321			3.64			15	0.631592	0.631592	15.6316	350
https://www.sciencedirect.com/science/article/pii/S0960852410010096	Bach	2014	Sugar kelp	0									16.58					14.1	69.32								39.44	5.14	52.03	2.99	0.6		14.46	0.0006283			10	146			1.67			15	1.37664	1.37664	16.3766	350
https://www.sciencedirect.com/science/article/pii/S0960852410010096	Bach	2014	Sugar kelp	0									16.58					14.1	69.32								39.44	5.14	52.03	2.99	0.6		14.46	0.0006283			10	585			6.62			15	0.34728	0.34728	15.3473	350
https://www.sciencedirect.com/science/article/pii/S0960852410010096	Bach	2014	Sugar kelp	0									16.58					14.1	69.32								39.44	5.14	52.03	2.99	0.6		14.46	0.0006283			10	585			6.62			15	0.34728	0.34728	15.3473	350
https://www.sciencedirect.com/science/article/pii/S0960852410010096	Bach	2014	Sugar kelp	0									16.58					14.1	69.32								39.44	5.14	52.03	2.99	0.6		14.46	0.0006283			10	585			6.62			15	0.34728	0.34728	15.3473	350
https://www.sciencedirect.com/science/article/pii/S0960852410010096	Bach	2014	Sugar kelp	0									16.58					14.1	69.32								39.44	5.14	52.03	2.99	0.6		14.46	0.0006283			10	585			6.62			15	0.34728	0.34728	15.3473	350
https://www.sciencedirect.com/science/article/pii/S0016236114008667	Anastasakis	2015	L. digitata	0									23.9				6.6										33.1	4.7	33.9	1.8	0.8		13.1	0.075	8	30	21.0526	25			0.313			15	7.34503	7.34503	22.345	350
https://www.sciencedirect.com/science/article/pii/S0016236114008667	Anastasakis	2015	L. hyperborea	0									16.6				5.6										35.8	5.1	39.1	1.5	0.9		14.2	0.075	8	30	21.0526	25			0.313			15	7.34503	7.34503	22.345	350
https://www.sciencedirect.com/science/article/pii/S0016236114008667	Anastasakis	2015	L. saccharina	0									21.8				6.4										32.5	4.5	37.9	1.1	0.6		12.2	0.075	8	30	21.0526	25			0.313			15	7.34503	7.34503	22.345	350
https://www.sciencedirect.com/science/article/pii/S0016236114008667	Anastasakis	2015	A. esculenta	0									25.2				6.8										34.6	4.7	31.1	1.9	0.6		13.9	0.075	8	30	21.0526	25			0.313			15	7.34503	7.34503	22.345	350
https://www.sciencedirect.com/science/article/pii/S0960852416300906	Wagner	2016	Rapeseed oil	1							100		0.53	100			0										77.45	13.37	9.18	0			39.37	0.05	4	20	16.6667				0.0884				25.9999	25.9999	26	300
https://www.sciencedirect.com/science/article/pii/S0960852416300906	Wagner	2016	Rapeseed oil	1							100		0.53	100			0										77.45	13.37	9.18	0			39.37	0.05	4	20	16.6667				0.0560651				40.9998	40.9998	41	320
https://www.sciencedirect.com/science/article/pii/S0960852416300906	Wagner	2016	Rapeseed oil	1							100		0.53	100			0										77.45	13.37	9.18	0			39.37	0.05	4	20	16.6667				0.041052				55.9994	55.9994	56	340
https://www.sciencedirect.com/science/article/pii/S0960852416300906	Wagner	2016	Rapeseed oil	1							100		0.53	100			0										77.45	13.37	9.18	0			39.37	0.05	4	20	16.6667				0.0323817				70.9999	70.9999	71	360
https://www.sciencedirect.com/science/article/pii/S0960852416300906	Wagner	2016	Corn flour	1	88	88				0.2	0.1			88.3			11.8										44.77	8.02	47.21	0			15.09	0.05	4	20	16.6667				0.07536				30.4999	30.4999	30.5	306
https://www.sciencedirect.com/science/article/pii/S0960852416300906	Wagner	2016	Corn flour	1	88	88				0.2	0.1			88.3			11.8										44.77	8.02	47.21	0			15.09	0.05	4	20	16.6667				0.0540864				42.5001	42.5001	42.5	322
https://www.sciencedirect.com/science/article/pii/S0960852416300906	Wagner	2016	Corn flour	1	88	88				0.2	0.1			88.3			11.8										44.77	8.02	47.21	0			15.09	0.05	4	20	16.6667				0.041052				55.9994	55.9994	56	340
https://www.sciencedirect.com/science/article/pii/S0960852416300906	Wagner	2016	Corn flour	1	88	88				0.2	0.1			88.3			11.8										44.77	8.02	47.21	0			15.09	0.05	4	20	16.6667				0.0323817				70.9999	70.9999	71	360
https://www.sciencedirect.com/science/article/pii/S0960852416300906	Wagner	2016	Soy protein	1						91	3.3		4.5	94.3			6.8										53.28	8.32	23.38	15.02			21.1	0.05	4	20	16.6667				0.0884				25.9999	25.9999	26	300
https://www.sciencedirect.com/science/article/pii/S0960852416300906	Wagner	2016	Soy protein	1						91	3.3		4.5	94.3			6.8										53.28	8.32	23.38	15.02			21.1	0.05	4	20	16.6667				0.0560648				41	41	41	320
https://www.sciencedirect.com/science/article/pii/S0960852416300906	Wagner	2016	Soy protein	1						91	3.3		4.5	94.3			6.8										53.28	8.32	23.38	15.02			21.1	0.05	4	20	16.6667				0.041052				55.9994	55.9994	56	340
https://www.sciencedirect.com/science/article/pii/S0960852416300906	Wagner	2016	Soy protein	1						91	3.3		4.5	94.3			6.8										53.28	8.32	23.38	15.02			21.1	0.05	4	20	16.6667				0.0323817				70.9999	70.9999	71	360
https://www.sciencedirect.com/science/article/pii/S0196890414007286	Yang	2014	Enteromopha prolifera	0									15.91				8.61	6.81	68.67								35.2	5.2	32.98	2.1			13.4		30	0	100							20	#DIV/0!	0	20	250
https://www.sciencedirect.com/science/article/pii/S0196890414007286	Yang	2014	Enteromopha prolifera	0									15.91				8.61	6.81	68.67								35.2	5.2	32.98	2.1			13.4		30	30	50							20	#DIV/0!	0	20	250
https://www.sciencedirect.com/science/article/pii/S0196890414007286	Yang	2014	Enteromopha prolifera	0									15.91				8.61	6.81	68.67								35.2	5.2	32.98	2.1			13.4		30	60	33.3333							20	#DIV/0!	0	20	250
https://www.sciencedirect.com/science/article/pii/S0196890414007286	Yang	2014	Enteromopha prolifera	0									15.91				8.61	6.81	68.67								35.2	5.2	32.98	2.1			13.4		30	90	25							20	#DIV/0!	0	20	250
https://www.sciencedirect.com/science/article/pii/S0196890414007286	Yang	2014	Enteromopha prolifera	0									15.91				8.61	6.81	68.67								35.2	5.2	32.98	2.1			13.4		30	120	20							20	#DIV/0!	0	20	250
https://www.sciencedirect.com/science/article/pii/S0196890414007286	Yang	2014	Enteromopha prolifera	0									15.91				8.61	6.81	68.67								35.2	5.2	32.98	2.1			13.4		30	90	25							20	#DIV/0!	0	20	230
https://www.sciencedirect.com/science/article/pii/S0196890414007286	Yang	2014	Enteromopha prolifera	0									15.91				8.61	6.81	68.67								35.2	5.2	32.98	2.1			13.4		30	90	25							20	#DIV/0!	0	20	270
https://www.sciencedirect.com/science/article/pii/S0196890414007286	Yang	2014	Enteromopha prolifera	0									15.91				8.61	6.81	68.67								35.2	5.2	32.98	2.1			13.4		30	90	25							20	#DIV/0!	0	20	290
https://www.sciencedirect.com/science/article/pii/S0196890414007286	Yang	2014	Enteromopha prolifera	0									15.91				8.61	6.81	68.67								35.2	5.2	32.98	2.1			13.4		30	90	25							20	#DIV/0!	0	20	310
https://www.sciencedirect.com/science/article/pii/S0196890414007286	Yang	2014	Enteromopha prolifera	0									15.91				8.61	6.81	68.67								35.2	5.2	32.98	2.1			13.4		30	90	25							40	#DIV/0!	0	40	290
https://www.sciencedirect.com/science/article/pii/S0196890414007286	Yang	2014	Enteromopha prolifera	0									15.91				8.61	6.81	68.67								35.2	5.2	32.98	2.1			13.4		30	90	25							60	#DIV/0!	0	60	290
https://www.sciencedirect.com/science/article/pii/S0196890414007286	Yang	2014	Enteromopha prolifera	0									15.91				8.61	6.81	68.67								35.2	5.2	32.98	2.1			13.4		30	90	25							80	#DIV/0!	0	80	290
https://www.sciencedirect.com/science/article/pii/S0196890414007286	Yang	2014	Enteromopha prolifera	0									15.91				8.61	6.81	68.67								35.2	5.2	32.98	2.1			13.4		30	90	25							100	#DIV/0!	0	100	290
https://www.sciencedirect.com/science/article/pii/S0960852416308719	Hadhoum	2016	oil mill wastewater	1									22.52				88	8.5	58.7								54.86	7	14.23	1.38	0			0.998			12							30	#DIV/0!	0	30	240
https://www.sciencedirect.com/science/article/pii/S0960852416308719	Hadhoum	2016	oil mill wastewater	1									22.52				88	8.5	58.7								54.86	7	14.23	1.38	0			0.998			12							30	#DIV/0!	0	30	260
https://www.sciencedirect.com/science/article/pii/S0960852416308719	Hadhoum	2016	oil mill wastewater	1									22.52				88	8.5	58.7								54.86	7	14.23	1.38	0			0.998			12							30	#DIV/0!	0	30	280
https://www.sciencedirect.com/science/article/pii/S0960852416308719	Hadhoum	2016	oil mill wastewater	1									22.52				88	8.5	58.7								54.86	7	14.23	1.38	0			0.998			12							30	#DIV/0!	0	30	300
https://www.sciencedirect.com/science/article/pii/S0960852416308719	Hadhoum	2016	oil mill wastewater	1									22.52				88	8.5	58.7								54.86	7	14.23	1.38	0			0.998			12							15	#DIV/0!	0	15	280
https://www.sciencedirect.com/science/article/pii/S0960852416308719	Hadhoum	2016	oil mill wastewater	1									22.52				88	8.5	58.7								54.86	7	14.23	1.38	0			0.998			12							45	#DIV/0!	0	45	280
https://www.sciencedirect.com/science/article/pii/S0960852416308719	Hadhoum	2016	oil mill wastewater	1									22.52				88	8.5	58.7								54.86	7	14.23	1.38	0			0.998			42							30	#DIV/0!	0	30	280
https://www.sciencedirect.com/science/article/pii/S0960852416308719	Hadhoum	2016	oil mill wastewater	1									22.52				88	8.5	58.7								54.86	7	14.23	1.38	0			0.998			32							30	#DIV/0!	0	30	280
https://www.sciencedirect.com/science/article/pii/S0960852416308719	Hadhoum	2016	oil mill wastewater	1									22.52				88	8.5	58.7								54.86	7	14.23	1.38	0			0.998			22							30	#DIV/0!	0	30	280
https://www.sciencedirect.com/science/article/pii/S0360319922021371	Guan	2022	Angelica sinensis	0	40.31			18.64	21.67			21.2	6.4	61.51			2.59	15.7	75								48.34	5.86	34.52	2.02	0.24		19.58	0.5		150	20	5			0.059		30	0	38.9736	38.9736	38.9736	400
https://www.sciencedirect.com/science/article/pii/S0360319922021371	Guan	2022	Angelica sinensis	0	40.31			18.64	21.67			21.2	6.4	61.51			2.59	15.7	75								48.34	5.86	34.52	2.02	0.24		19.58	0.5		150	20	5			0.059		30	10	38.9736	38.9736	48.9736	400
https://www.sciencedirect.com/science/article/pii/S0360319922021371	Guan	2022	Angelica sinensis	0	40.31			18.64	21.67			21.2	6.4	61.51			2.59	15.7	75								48.34	5.86	34.52	2.02	0.24		19.58	0.5		150	20	5			0.059		30	30	38.9736	38.9736	68.9736	400
https://www.sciencedirect.com/science/article/pii/S0360319922021371	Guan	2022	Angelica sinensis	0	40.31			18.64	21.67			21.2	6.4	61.51			2.59	15.7	75								48.34	5.86	34.52	2.02	0.24		19.58	0.5		150	20	5			0.059		30	60	38.9736	38.9736	98.9736	400
https://www.sciencedirect.com/science/article/pii/S0016236122016039	Adedeji	2022	brewery trub	0	42.4			42.4		25.52		23.05	21.1	90.97			83.99	2.71	76.19								47.63	5.96	42.37	4.04			17.06	0.3	100		10							30	#DIV/0!	0	30	300
https://www.sciencedirect.com/science/article/pii/S0016236122016039	Adedeji	2022	winery rose lees	1	29.86			29.86		32.25		21.96	34.99	84.07			87.4	24.52	40.48								40.33	5.01	49.49	5.16			11.99	0.3	100		10							30	#DIV/0!	0	30	300
https://www.sciencedirect.com/science/article/pii/S0016236122016039	Adedeji	2022	primary sludge	1	42.97			42.97		36.38		19.03	8.59	98.38			98.76	6.16	85.25								45.53	6.6	42.05	5.82			17.31	0.3	100		10							30	#DIV/0!	0	30	300
https://www.sciencedirect.com/science/article/pii/S0016236122016039	Adedeji	2022	return activated sludge	1	29.77			29.77		36.5		18.41	29.5	84.68			99.48	21.22	49.27								36.84	6.06	51.26	5.84			11.97	0.3	100		10							30	#DIV/0!	0	30	300
https://www.sciencedirect.com/science/article/pii/S0016236122016039	Adedeji	2022	BT+PS 75/25	1	42.5425			42.5425		28.235		22.045	17.9725	92.8225			87.6825	3.5725	78.455								47.105	6.12	42.29	4.485			17.1225	0.3	100		10							30	#DIV/0!	0	30	300
https://www.sciencedirect.com/science/article/pii/S0016236122016039	Adedeji	2022	BT+PS 50/50	1	42.685			42.685		30.95		21.04	14.845	94.675			91.375	4.435	80.72								46.58	6.28	42.21	4.93			17.185	0.3	100		10							30	#DIV/0!	0	30	300
https://www.sciencedirect.com/science/article/pii/S0016236122016039	Adedeji	2022	BT+PS 25/75	1	42.8275			42.8275		33.665		20.035	11.7175	96.5275			95.0675	5.2975	82.985								46.055	6.44	42.13	5.375			17.2475	0.3	100		10							30	#DIV/0!	0	30	300
https://www.sciencedirect.com/science/article/pii/S0016236122016039	Adedeji	2022	BT+RAS 75/25	1	39.2425			39.2425		28.265		21.89	23.2	89.3975			87.8625	7.3375	69.46								44.9325	5.985	44.5925	4.49			15.7875	0.3	100		10							30	#DIV/0!	0	30	300
https://www.sciencedirect.com/science/article/pii/S0016236122016039	Adedeji	2022	BT+RAS 50/50	1	36.085			36.085		31.01		20.73	25.3	87.825			91.735	11.965	62.73								42.235	6.01	46.815	4.94			14.515	0.3	100		10							30	#DIV/0!	0	30	300
https://www.sciencedirect.com/science/article/pii/S0016236122016039	Adedeji	2022	BT+RAS 25/75	1	32.9275			32.9275		33.755		19.57	27.4	86.2525			95.6075	16.5925	56								39.5375	6.035	49.0375	5.39			13.2425	0.3	100		10							30	#DIV/0!	0	30	300
https://www.sciencedirect.com/science/article/pii/S0016236122016039	Adedeji	2022	RL+PS 75/25	1	33.1375			33.1375		33.2825		21.2275	28.39	87.6475			90.24	19.93	51.6725								41.63	5.4075	47.63	5.325			13.32	0.3	100		10							30	#DIV/0!	0	30	300
https://www.sciencedirect.com/science/article/pii/S0016236122016039	Adedeji	2022	RL+PS 50/50	1	36.415			36.415		34.315		20.495	21.79	91.225			93.08	15.34	62.865								42.93	5.805	45.77	5.49			14.65	0.3	100		10							30	#DIV/0!	0	30	300
https://www.sciencedirect.com/science/article/pii/S0016236122016039	Adedeji	2022	RL+PS 25/75	1	39.6925			39.6925		35.3475		19.7625	15.19	94.8025			95.92	10.75	74.0575								44.23	6.2025	43.91	5.655			15.98	0.3	100		10							30	#DIV/0!	0	30	300
https://www.sciencedirect.com/science/article/pii/S0016236122016039	Adedeji	2022	RL+RAS 75/25	1	29.8375			29.8375		33.3125		21.0725	33.6175	84.2225			90.42	23.695	42.6775								39.4575	5.2725	49.9325	5.33			11.985	0.3	100		10							30	#DIV/0!	0	30	300
https://www.sciencedirect.com/science/article/pii/S0016236122016039	Adedeji	2022	RL+RAS 50/50	1	29.815			29.815		34.375		20.185	32.245	84.375			93.44	22.87	44.875								38.585	5.535	50.375	5.5			11.98	0.3	100		10							30	#DIV/0!	0	30	300
https://www.sciencedirect.com/science/article/pii/S0016236122016039	Adedeji	2022	RL+RAS 25/75	1	29.7925			29.7925		35.4375		19.2975	30.8725	84.5275			96.46	22.045	47.0725								37.7125	5.7975	50.8175	5.67			11.975	0.3	100		10							30	#DIV/0!	0	30	300
https://www.sciencedirect.com/science/article/pii/S2213343722010545	Passos	2022	Wheat straw	1	68.2	68.2				3.6		16.3	2.7	88.1	68.2	6.8											45.6	6.3	44.7	0.6	0.1		14.8	0.02	1	8	11.1111			4	1.045				2.19942	2.19942	2.19942	300
https://www.sciencedirect.com/science/article/pii/S2213343722010545	Passos	2022	Wheat straw + 0.25 Manure	1	61.775	61.775				6.275		18.25	6.05	86.3	61.775	6.2											45.3	6.25	41.175	1.025	0.2		18.75	0.02	1	8	11.1111			4	1.045				2.19942	2.19942	2.19942	300
https://www.sciencedirect.com/science/article/pii/S2213343722010545	Passos	2022	Wheat straw + 0.5 Manure	1	55.35	55.35				8.95		20.2	9.4	84.5	55.35	5.6											45	6.2	37.65	1.45	0.3		22.7	0.02	1	8	11.1111			4	1.045				2.19942	2.19942	2.19942	300
https://www.sciencedirect.com/science/article/pii/S2213343722010545	Passos	2022	Wheat straw + 0.75 Manure	1	48.925	48.925				11.625		22.15	12.75	82.7	48.925	5											44.7	6.15	34.125	1.875	0.4		26.65	0.02	1	8	11.1111			4	1.045				2.19942	2.19942	2.19942	300
https://www.sciencedirect.com/science/article/pii/S2213343722010545	Passos	2022	Manure	1	42.5	42.5				14.3		24.1	16.1	80.9	42.5	4.4											44.4	6.1	30.6	2.3	0.5		30.6	0.02	1	8	11.1111			4	1.045				2.19942	2.19942	2.19942	300
https://www.sciencedirect.com/science/article/pii/S2213343722010545	Passos	2022	Wheat straw	1	68.2	68.2				3.6		16.3	2.7	88.1	68.2	6.8											45.6	6.3	44.7	0.6	0.1		14.8	0.02	1	8	11.1111			4	1.045				2.19973	2.19973	2.19973	325
https://www.sciencedirect.com/science/article/pii/S2213343722010545	Passos	2022	Wheat straw + 0.25 Manure	1	61.775	61.775				6.275		18.25	6.05	86.3	61.775	6.2											45.3	6.25	41.175	1.025	0.2		18.75	0.02	1	8	11.1111			4	1.045				2.19973	2.19973	2.19973	325
https://www.sciencedirect.com/science/article/pii/S2213343722010545	Passos	2022	Wheat straw + 0.5 Manure	1	55.35	55.35				8.95		20.2	9.4	84.5	55.35	5.6											45	6.2	37.65	1.45	0.3		22.7	0.02	1	8	11.1111			4	1.045				2.19973	2.19973	2.19973	325
https://www.sciencedirect.com/science/article/pii/S2213343722010545	Passos	2022	Wheat straw + 0.75 Manure	1	48.925	48.925				11.625		22.15	12.75	82.7	48.925	5											44.7	6.15	34.125	1.875	0.4		26.65	0.02	1	8	11.1111			4	1.045				2.19973	2.19973	2.19973	325
https://www.sciencedirect.com/science/article/pii/S2213343722010545	Passos	2022	Manure	1	42.5	42.5				14.3		24.1	16.1	80.9	42.5	4.4											44.4	6.1	30.6	2.3	0.5		30.6	0.02	1	8	11.1111			4	1.045				2.19973	2.19973	2.19973	325
https://www.sciencedirect.com/science/article/pii/S2213343722010545	Passos	2022	Wheat straw	1	68.2	68.2				3.6		16.3	2.7	88.1	68.2	6.8											45.6	6.3	44.7	0.6	0.1		14.8	0.02	1	8	11.1111			4	1.045				2.19999	2.19999	2.19999	350
https://www.sciencedirect.com/science/article/pii/S2213343722010545	Passos	2022	Wheat straw + 0.25 Manure	1	61.775	61.775				6.275		18.25	6.05	86.3	61.775	6.2											45.3	6.25	41.175	1.025	0.2		18.75	0.02	1	8	11.1111			4	1.045				2.19999	2.19999	2.19999	350
https://www.sciencedirect.com/science/article/pii/S2213343722010545	Passos	2022	Wheat straw + 0.5 Manure	1	55.35	55.35				8.95		20.2	9.4	84.5	55.35	5.6											45	6.2	37.65	1.45	0.3		22.7	0.02	1	8	11.1111			4	1.045				2.19999	2.19999	2.19999	350
https://www.sciencedirect.com/science/article/pii/S2213343722010545	Passos	2022	Wheat straw + 0.75 Manure	1	48.925	48.925				11.625		22.15	12.75	82.7	48.925	5											44.7	6.15	34.125	1.875	0.4		26.65	0.02	1	8	11.1111			4	1.045				2.19999	2.19999	2.19999	350
https://www.sciencedirect.com/science/article/pii/S2213343722010545	Passos	2022	Manure	1	42.5	42.5				14.3		24.1	16.1	80.9	42.5	4.4											44.4	6.1	30.6	2.3	0.5		30.6	0.02	1	8	11.1111			4	1.045				2.19999	2.19999	2.19999	350
https://www.sciencedirect.com/science/article/pii/S2213343722010545	Passos	2022	Wheat straw	1	68.2	68.2				3.6		16.3	2.7	88.1	68.2	6.8											45.6	6.3	44.7	0.6	0.1		14.8	0.02	1	8	11.1111			4	1.045				2.20014	2.20014	2.20014	365
https://www.sciencedirect.com/science/article/pii/S2213343722010545	Passos	2022	Wheat straw + 0.25 Manure	1	61.775	61.775				6.275		18.25	6.05	86.3	61.775	6.2											45.3	6.25	41.175	1.025	0.2		18.75	0.02	1	8	11.1111			4	1.045				2.20014	2.20014	2.20014	365
https://www.sciencedirect.com/science/article/pii/S2213343722010545	Passos	2022	Wheat straw + 0.5 Manure	1	55.35	55.35				8.95		20.2	9.4	84.5	55.35	5.6											45	6.2	37.65	1.45	0.3		22.7	0.02	1	8	11.1111			4	1.045				2.20014	2.20014	2.20014	365
https://www.sciencedirect.com/science/article/pii/S2213343722010545	Passos	2022	Wheat straw + 0.75 Manure	1	48.925	48.925				11.625		22.15	12.75	82.7	48.925	5											44.7	6.15	34.125	1.875	0.4		26.65	0.02	1	8	11.1111			4	1.045				2.20014	2.20014	2.20014	365
https://www.sciencedirect.com/science/article/pii/S2213343722010545	Passos	2022	Manure	1	42.5	42.5				14.3		24.1	16.1	80.9	42.5	4.4											44.4	6.1	30.6	2.3	0.5		30.6	0.02	1	8	11.1111			4	1.045				2.20014	2.20014	2.20014	365
https://www.sciencedirect.com/science/article/pii/S0165237022001322	Hao	2022	Municipal Sludge	1									49.1				1.6										45.66	7.02	38.64	6.7	1.98		18.8	0.0049	0.262	2.62	9.09091							40	#DIV/0!	0	40	200
https://www.sciencedirect.com/science/article/pii/S0165237022001322	Hao	2022	Municipal Sludge	1									49.1				1.6										45.66	7.02	38.64	6.7	1.98		18.8	0.0049	0.262	2.62	9.09091							40	#DIV/0!	0	40	300
https://www.sciencedirect.com/science/article/pii/S0165237022001322	Hao	2022	Municipal Sludge	1									49.1				1.6										45.66	7.02	38.64	6.7	1.98		18.8	0.0049	0.262	2.62	9.09091							40	#DIV/0!	0	40	350
https://www.sciencedirect.com/science/article/pii/S0165237022001322	Hao	2022	Municipal Sludge	1									49.1				1.6										45.66	7.02	38.64	6.7	1.98		18.8	0.0049	0.262	2.62	9.09091							20	#DIV/0!	0	20	350
https://www.sciencedirect.com/science/article/pii/S0165237022001322	Hao	2022	Municipal Sludge	1									49.1				1.6										45.66	7.02	38.64	6.7	1.98		18.8	0.0049	0.262	2.62	9.09091							50	#DIV/0!	0	50	350
https://www.sciencedirect.com/science/article/abs/pii/S0926669019307058	Wu	2019	eucalyptus sawdust	1																														0.15	4	40	9.09091							30	#DIV/0!	0	30	260
https://www.sciencedirect.com/science/article/abs/pii/S0926669019307058	Wu	2019	eucalyptus sawdust	1																														0.15	4	40	9.09091							30	#DIV/0!	0	30	280
https://www.sciencedirect.com/science/article/abs/pii/S0926669019307058	Wu	2019	eucalyptus sawdust	1																														0.15	4	40	9.09091							30	#DIV/0!	0	30	300
https://www.sciencedirect.com/science/article/abs/pii/S0926669019307058	Wu	2019	eucalyptus sawdust	1																														0.15	4	40	9.09091							30	#DIV/0!	0	30	320
https://www.sciencedirect.com/science/article/pii/S0016236119323397?via%3Dihub	Tian	2020	corn straw	0	56.33			30.81	25.52			16.76	7	73.09				24.5	68.5								44.57	5.53	33.7	0.93	0.1		16.96	1	150	400	27.2727							60	#DIV/0!	0	60	320
https://www.sciencedirect.com/science/article/pii/S0016236119323397?via%3Dihub	Tian	2020	peanut straw	0	56.83			36.56	20.27			18.36	13.05	75.19				21.45	65.5								41.42	5.51	35.21	1.27	0.15		15.6	1	150	400	27.2727							60	#DIV/0!	0	60	320
https://www.sciencedirect.com/science/article/pii/S0016236119323397?via%3Dihub	Tian	2020	rice straw	0	77.42			46.33	31.09			10.17	15.1	87.59				20.91	64								41.34	5.33	34.29	1.12	0.14		15.48	1	150	400	27.2727							60	#DIV/0!	0	60	320
https://www.sciencedirect.com/science/article/pii/S0016236119323397?via%3Dihub	Tian	2020	soybean straw	0	64.44			42.39	22.05			18.93	4.43	83.37				22.47	73.1								45.99	6.07	39	1.38	0.11		17.26	1	150	400	27.2727							60	#DIV/0!	0	60	320
https://www.sciencedirect.com/science/article/pii/S0960852422003601	Harisankar	2022	rice straw-milli-Q	0	53			31.4	21.6			19.1	17.6	72.1													36.2	5.2	40.3	0.7			14.2	2	45	450	9.09091						18	30	#DIV/0!	0	30	350
https://www.sciencedirect.com/science/article/pii/S0960852422003601	Harisankar	2022	rice straw-Tap	0	53			31.4	21.6			19.1	17.6	72.1													36.2	5.2	40.3	0.7			14.2	2	45	450	9.09091						18	30	#DIV/0!	0	30	350
https://www.sciencedirect.com/science/article/pii/S0960852422003601	Harisankar	2022	rice straw-Seawater	0	53			31.4	21.6			19.1	17.6	72.1													36.2	5.2	40.3	0.7			14.2	2	45	450	9.09091						18	30	#DIV/0!	0	30	350
https://www.sciencedirect.com/science/article/pii/S0960852422003601	Harisankar	2022	rice straw-Recycled	0	53			31.4	21.6			19.1	17.6	72.1													36.2	5.2	40.3	0.7			14.2	2	45	450	9.09091						18	30	#DIV/0!	0	30	350
https://www.sciencedirect.com/science/article/pii/S0960852422003601	Harisankar	2022	rice straw-Industry	0	53			31.4	21.6			19.1	17.6	72.1													36.2	5.2	40.3	0.7			14.2	2	45	450	9.09091						18	30	#DIV/0!	0	30	350
https://pubs.acs.org/doi/10.1021/acssuschemeng.9b06873	Gollakota	2020	starch	0	100		100							100								0	0	100			37	7.7	55.2	0.1			17	0.0041			5								#DIV/0!	0	3.2	350
https://pubs.acs.org/doi/10.1021/acssuschemeng.9b06873	Gollakota	2020	starch	1	100		100							100								0	0	100			37	7.7	55.2	0.1			17	0.0041			5								#DIV/0!	0	5.6	350
https://pubs.acs.org/doi/10.1021/acssuschemeng.9b06873	Gollakota	2020	starch	1	100		100							100								0	0	100			37	7.7	55.2	0.1			17	0.0041			5								#DIV/0!	0	10	350
https://pubs.acs.org/doi/10.1021/acssuschemeng.9b06873	Gollakota	2020	starch	1	100		100							100								0	0	100			37	7.7	55.2	0.1			17	0.0041			5								#DIV/0!	0	31.6	350
https://pubs.acs.org/doi/10.1021/acssuschemeng.9b06873	Gollakota	2020	starch	1	100		100							100								0	0	100			37	7.7	55.2	0.1			17	0.0041			5								#DIV/0!	0	1	400
https://pubs.acs.org/doi/10.1021/acssuschemeng.9b06873	Gollakota	2020	starch	1	100		100							100								0	0	100			37	7.7	55.2	0.1			17	0.0041			5								#DIV/0!	0	3.2	400
https://pubs.acs.org/doi/10.1021/acssuschemeng.9b06873	Gollakota	2020	starch	1	100		100							100								0	0	100			37	7.7	55.2	0.1			17	0.0041			5								#DIV/0!	0	1	450
https://pubs.acs.org/doi/10.1021/acssuschemeng.9b06873	Gollakota	2020	starch	1	100		100							100								0	0	100			37	7.7	55.2	0.1			17	0.0041			5								#DIV/0!	0	3.2	450
https://pubs.acs.org/doi/10.1021/acssuschemeng.9b06873	Gollakota	2020	starch	1	100		100							100								0	0	100			37	7.7	55.2	0.1			17	0.0041			5								#DIV/0!	0	1	500
https://pubs.acs.org/doi/10.1021/acssuschemeng.9b06874	Gollakota	2020	cellulose	1	100			100						100								100	0	0			39.4	8	52.5	0.1			18.6	0.0041			5								#DIV/0!	0	3.2	350
https://pubs.acs.org/doi/10.1021/acssuschemeng.9b06874	Gollakota	2020	cellulose	1	100			100						100								100	0	0			39.4	8	52.5	0.1			18.6	0.0041			5								#DIV/0!	0	5.6	350
https://pubs.acs.org/doi/10.1021/acssuschemeng.9b06874	Gollakota	2020	cellulose	1	100			100						100								100	0	0			39.4	8	52.5	0.1			18.6	0.0041			5								#DIV/0!	0	10	350
https://pubs.acs.org/doi/10.1021/acssuschemeng.9b06874	Gollakota	2020	cellulose	1	100			100						100								100	0	0			39.4	8	52.5	0.1			18.6	0.0041			5								#DIV/0!	0	31.6	350
https://pubs.acs.org/doi/10.1021/acssuschemeng.9b06874	Gollakota	2020	cellulose	1	100			100						100								100	0	0			39.4	8	52.5	0.1			18.6	0.0041			5								#DIV/0!	0	1	400
https://pubs.acs.org/doi/10.1021/acssuschemeng.9b06874	Gollakota	2020	cellulose	1	100			100						100								100	0	0			39.4	8	52.5	0.1			18.6	0.0041			5								#DIV/0!	0	3.2	400
https://pubs.acs.org/doi/10.1021/acssuschemeng.9b06874	Gollakota	2020	cellulose	1	100			100						100								100	0	0			39.4	8	52.5	0.1			18.6	0.0041			5								#DIV/0!	0	1	450
https://pubs.acs.org/doi/10.1021/acssuschemeng.9b06874	Gollakota	2020	cellulose	1	100			100						100								100	0	0			39.4	8	52.5	0.1			18.6	0.0041			5								#DIV/0!	0	3.2	450
https://pubs.acs.org/doi/10.1021/acssuschemeng.9b06874	Gollakota	2020	cellulose	1	100			100						100								100	0	0			39.4	8	52.5	0.1			18.6	0.0041			5								#DIV/0!	0	1	500
https://pubs.acs.org/doi/10.1021/acssuschemeng.9b06875	Gollakota	2020	amylopectin	1	100		100							100								0	0	100			40.5	8.2	51.1	0.2			19.3	0.0041			5								#DIV/0!	0	3.2	350
https://pubs.acs.org/doi/10.1021/acssuschemeng.9b06875	Gollakota	2020	amylopectin	1	100		100							100								0	0	100			40.5	8.2	51.1	0.2			19.3	0.0041			5								#DIV/0!	0	5.6	350
https://pubs.acs.org/doi/10.1021/acssuschemeng.9b06875	Gollakota	2020	amylopectin	1	100		100							100								0	0	100			40.5	8.2	51.1	0.2			19.3	0.0041			5								#DIV/0!	0	10	350
https://pubs.acs.org/doi/10.1021/acssuschemeng.9b06875	Gollakota	2020	amylopectin	1	100		100							100								0	0	100			40.5	8.2	51.1	0.2			19.3	0.0041			5								#DIV/0!	0	31.6	350
https://pubs.acs.org/doi/10.1021/acssuschemeng.9b06875	Gollakota	2020	amylopectin	1	100		100							100								0	0	100			40.5	8.2	51.1	0.2			19.3	0.0041			5								#DIV/0!	0	1	400
https://pubs.acs.org/doi/10.1021/acssuschemeng.9b06875	Gollakota	2020	amylopectin	1	100		100							100								0	0	100			40.5	8.2	51.1	0.2			19.3	0.0041			5								#DIV/0!	0	3.2	400
https://pubs.acs.org/doi/10.1021/acssuschemeng.9b06875	Gollakota	2020	amylopectin	1	100		100							100								0	0	100			40.5	8.2	51.1	0.2			19.3	0.0041			5								#DIV/0!	0	1	450
https://pubs.acs.org/doi/10.1021/acssuschemeng.9b06875	Gollakota	2020	amylopectin	1	100		100							100								0	0	100			40.5	8.2	51.1	0.2			19.3	0.0041			5								#DIV/0!	0	3.2	450
https://pubs.acs.org/doi/10.1021/acssuschemeng.9b06875	Gollakota	2020	amylopectin	1	100		100							100								0	0	100			40.5	8.2	51.1	0.2			19.3	0.0041			5								#DIV/0!	0	1	500
https://pubs.acs.org/doi/10.1021/acssuschemeng.9b06876	Gollakota	2020	amylose	1	100		100							100								100	0	0			42.3	7.6	50	0.1			19.3	0.0041			5								#DIV/0!	0	3.2	350
https://pubs.acs.org/doi/10.1021/acssuschemeng.9b06876	Gollakota	2020	amylose	1	100		100							100								100	0	0			42.3	7.6	50	0.1			19.3	0.0041			5								#DIV/0!	0	5.6	350
https://pubs.acs.org/doi/10.1021/acssuschemeng.9b06876	Gollakota	2020	amylose	1	100		100							100								100	0	0			42.3	7.6	50	0.1			19.3	0.0041			5								#DIV/0!	0	10	350
https://pubs.acs.org/doi/10.1021/acssuschemeng.9b06876	Gollakota	2020	amylose	1	100		100							100								100	0	0			42.3	7.6	50	0.1			19.3	0.0041			5								#DIV/0!	0	31.6	350
https://pubs.acs.org/doi/10.1021/acssuschemeng.9b06876	Gollakota	2020	amylose	1	100		100							100								100	0	0			42.3	7.6	50	0.1			19.3	0.0041			5								#DIV/0!	0	1	400
https://pubs.acs.org/doi/10.1021/acssuschemeng.9b06876	Gollakota	2020	amylose	1	100		100							100								100	0	0			42.3	7.6	50	0.1			19.3	0.0041			5								#DIV/0!	0	3.2	400
https://pubs.acs.org/doi/10.1021/acssuschemeng.9b06876	Gollakota	2020	amylose	1	100		100							100								100	0	0			42.3	7.6	50	0.1			19.3	0.0041			5								#DIV/0!	0	1	450
https://pubs.acs.org/doi/10.1021/acssuschemeng.9b06876	Gollakota	2020	amylose	1	100		100							100								100	0	0			42.3	7.6	50	0.1			19.3	0.0041			5								#DIV/0!	0	3.2	450
https://pubs.acs.org/doi/10.1021/acssuschemeng.9b06876	Gollakota	2020	amylose	1	100		100							100								100	0	0			42.3	7.6	50	0.1			19.3	0.0041			5								#DIV/0!	0	1	500
https://pubs.acs.org/doi/10.1021/acssuschemeng.9b06877	Gollakota	2020	pectin	1	100		100							100								89.7	0.0005	10.3			38.9	7	53.9	0.2			17.6	0.0041			5								#DIV/0!	0	3.2	350
https://pubs.acs.org/doi/10.1021/acssuschemeng.9b06877	Gollakota	2020	pectin	1	100		100							100								89.7	0.0005	10.3			38.9	7	53.9	0.2			17.6	0.0041			5								#DIV/0!	0	5.6	350
https://pubs.acs.org/doi/10.1021/acssuschemeng.9b06877	Gollakota	2020	pectin	1	100		100							100								89.7	0.0005	10.3			38.9	7	53.9	0.2			17.6	0.0041			5								#DIV/0!	0	10	350
https://pubs.acs.org/doi/10.1021/acssuschemeng.9b06877	Gollakota	2020	pectin	1	100		100							100								89.7	0.0005	10.3			38.9	7	53.9	0.2			17.6	0.0041			5								#DIV/0!	0	31.6	350
https://pubs.acs.org/doi/10.1021/acssuschemeng.9b06877	Gollakota	2020	pectin	1	100		100							100								89.7	0.0005	10.3			38.9	7	53.9	0.2			17.6	0.0041			5								#DIV/0!	0	1	400
https://pubs.acs.org/doi/10.1021/acssuschemeng.9b06877	Gollakota	2020	pectin	1	100		100							100								89.7	0.0005	10.3			38.9	7	53.9	0.2			17.6	0.0041			5								#DIV/0!	0	3.2	400
https://pubs.acs.org/doi/10.1021/acssuschemeng.9b06877	Gollakota	2020	pectin	1	100		100							100								89.7	0.0005	10.3			38.9	7	53.9	0.2			17.6	0.0041			5								#DIV/0!	0	1	450
https://pubs.acs.org/doi/10.1021/acssuschemeng.9b06877	Gollakota	2020	pectin	1	100		100							100								89.7	0.0005	10.3			38.9	7	53.9	0.2			17.6	0.0041			5								#DIV/0!	0	3.2	450
https://pubs.acs.org/doi/10.1021/acssuschemeng.9b06877	Gollakota	2020	pectin	1	100		100							100								89.7	0.0005	10.3			38.9	7	53.9	0.2			17.6	0.0041			5								#DIV/0!	0	1	500
https://pubs.acs.org/doi/10.1021/acssuschemeng.9b06878	Gollakota	2020	chitin	1	100		100							100								100	0	0			44.5	6.6	42.3	6.6			18.7	0.0041			5								#DIV/0!	0	3.2	350
https://pubs.acs.org/doi/10.1021/acssuschemeng.9b06878	Gollakota	2020	chitin	1	100		100							100								100	0	0			44.5	6.6	42.3	6.6			18.7	0.0041			5								#DIV/0!	0	5.6	350
https://pubs.acs.org/doi/10.1021/acssuschemeng.9b06878	Gollakota	2020	chitin	1	100		100							100								100	0	0			44.5	6.6	42.3	6.6			18.7	0.0041			5								#DIV/0!	0	10	350
https://pubs.acs.org/doi/10.1021/acssuschemeng.9b06878	Gollakota	2020	chitin	1	100		100							100								100	0	0			44.5	6.6	42.3	6.6			18.7	0.0041			5								#DIV/0!	0	31.6	350
https://pubs.acs.org/doi/10.1021/acssuschemeng.9b06878	Gollakota	2020	chitin	1	100		100							100								100	0	0			44.5	6.6	42.3	6.6			18.7	0.0041			5								#DIV/0!	0	1	400
https://pubs.acs.org/doi/10.1021/acssuschemeng.9b06878	Gollakota	2020	chitin	1	100		100							100								100	0	0			44.5	6.6	42.3	6.6			18.7	0.0041			5								#DIV/0!	0	3.2	400
https://pubs.acs.org/doi/10.1021/acssuschemeng.9b06878	Gollakota	2020	chitin	1	100		100							100								100	0	0			44.5	6.6	42.3	6.6			18.7	0.0041			5								#DIV/0!	0	1	450
https://pubs.acs.org/doi/10.1021/acssuschemeng.9b06878	Gollakota	2020	chitin	1	100		100							100								100	0	0			44.5	6.6	42.3	6.6			18.7	0.0041			5								#DIV/0!	0	3.2	450
https://pubs.acs.org/doi/10.1021/acssuschemeng.9b06878	Gollakota	2020	chitin	1	100		100							100								100	0	0			44.5	6.6	42.3	6.6			18.7	0.0041			5								#DIV/0!	0	1	500
https://www.sciencedirect.com/science/article/pii/S0196890422005155	Jahromi	2022	municipal sewage sludge	1											29.8		82.4	17.3	52.9								33.1	5.5	25.9	5	0.7		14.1	1.8			17.6	4			0.0522			60	44.042	44.042	104.042	350
https://www.sciencedirect.com/science/article/pii/S0960852422004291	Ding	2022	Potato starch	1	100		100							100													37	5.42	57.49	0.08	0		13.4	0.004	0.4	1.6	20								#DIV/0!	0	30	320
https://www.sciencedirect.com/science/article/pii/S0960852422004291	Ding	2022	cellulose	1	100			100						100													41.9	5.07	52.91	0.12	0.23		15.13	0.004	0.4	1.6	20								#DIV/0!	0	30	320
https://www.sciencedirect.com/science/article/pii/S0960852422004291	Ding	2022	pectin	1	100		100							100													36.3	4.44	58.6	0.47	0.13		11.6	0.004	0.4	1.6	20								#DIV/0!	0	30	320
https://www.sciencedirect.com/science/article/pii/S0960852422004291	Ding	2022	chitin	1	100		100							100													43.3	5.27	44.9	6.39	0.16		16.1	0.004	0.4	1.6	20								#DIV/0!	0	30	320
https://www.sciencedirect.com/science/article/pii/S0960852422004291	Ding	2022	quaternary mixture	1	96.2		42.7	53.5		3.5	0.35			100.05																				0.004	0.4	1.6	20								#DIV/0!	0	30	320
https://www.sciencedirect.com/science/article/pii/S0048969720367474	Hong	2021	penicillin fermentation residue	1	1.66	1.66				45.4	3.85		8.04	50.91				9.34	82.62								44.88	6.27	34.12	5.93	0.77		18.03				12								#DIV/0!	0	120	260
https://www.sciencedirect.com/science/article/pii/S0048969720367474	Hong	2021	penicillin fermentation residue	1	1.66	1.66				45.4	3.85		8.04	50.91				9.34	82.62								44.88	6.27	34.12	5.93	0.77		18.03				12								#DIV/0!	0	120	300
https://www.sciencedirect.com/science/article/pii/S0048969720367474	Hong	2021	penicillin fermentation residue	1	1.66	1.66				45.4	3.85		8.04	50.91				9.34	82.62								44.88	6.27	34.12	5.93	0.77		18.03				12								#DIV/0!	0	240	260
https://www.sciencedirect.com/science/article/pii/S0048969720367474	Hong	2021	penicillin fermentation residue	1	1.66	1.66				45.4	3.85		8.04	50.91				9.34	82.62								44.88	6.27	34.12	5.93	0.77		18.03				12								#DIV/0!	0	240	300
https://www.sciencedirect.com/science/article/pii/S0048969720367474	Hong	2021	penicillin fermentation residue	1	1.66	1.66				45.4	3.85		8.04	50.91				9.34	82.62								44.88	6.27	34.12	5.93	0.77		18.03				18								#DIV/0!	0	120	260
https://www.sciencedirect.com/science/article/pii/S0048969720367474	Hong	2021	penicillin fermentation residue	1	1.66	1.66				45.4	3.85		8.04	50.91				9.34	82.62								44.88	6.27	34.12	5.93	0.77		18.03				18								#DIV/0!	0	120	300
https://www.sciencedirect.com/science/article/pii/S0048969720367474	Hong	2021	penicillin fermentation residue	1	1.66	1.66				45.4	3.85		8.04	50.91				9.34	82.62								44.88	6.27	34.12	5.93	0.77		18.03				18								#DIV/0!	0	240	260
https://www.sciencedirect.com/science/article/pii/S0048969720367474	Hong	2021	penicillin fermentation residue	1	1.66	1.66				45.4	3.85		8.04	50.91				9.34	82.62								44.88	6.27	34.12	5.93	0.77		18.03				18								#DIV/0!	0	240	300
https://www.sciencedirect.com/science/article/pii/S0048969720367474	Hong	2021	penicillin fermentation residue	1	1.66	1.66				45.4	3.85		8.04	50.91				9.34	82.62								44.88	6.27	34.12	5.93	0.77		18.03				15								#DIV/0!	0	180	245
https://www.sciencedirect.com/science/article/pii/S0048969720367474	Hong	2021	penicillin fermentation residue	1	1.66	1.66				45.4	3.85		8.04	50.91				9.34	82.62								44.88	6.27	34.12	5.93	0.77		18.03				15								#DIV/0!	0	180	315
https://www.sciencedirect.com/science/article/pii/S0048969720367474	Hong	2021	penicillin fermentation residue	1	1.66	1.66				45.4	3.85		8.04	50.91				9.34	82.62								44.88	6.27	34.12	5.93	0.77		18.03				15								#DIV/0!	0	80	280
https://www.sciencedirect.com/science/article/pii/S0048969720367474	Hong	2021	penicillin fermentation residue	1	1.66	1.66				45.4	3.85		8.04	50.91				9.34	82.62								44.88	6.27	34.12	5.93	0.77		18.03				15								#DIV/0!	0	280	280
https://www.sciencedirect.com/science/article/pii/S0048969720367474	Hong	2021	penicillin fermentation residue	1	1.66	1.66				45.4	3.85		8.04	50.91				9.34	82.62								44.88	6.27	34.12	5.93	0.77		18.03				10								#DIV/0!	0	180	280
https://www.sciencedirect.com/science/article/pii/S0048969720367474	Hong	2021	penicillin fermentation residue	1	1.66	1.66				45.4	3.85		8.04	50.91				9.34	82.62								44.88	6.27	34.12	5.93	0.77		18.03				20								#DIV/0!	0	180	280
https://www.sciencedirect.com/science/article/pii/S0048969720367474	Hong	2021	penicillin fermentation residue	1	1.66	1.66				45.4	3.85		8.04	50.91				9.34	82.62								44.88	6.27	34.12	5.93	0.77		18.03				15								#DIV/0!	0	180	280
https://www.sciencedirect.com/science/article/pii/S0048969720367474	Hong	2021	penicillin fermentation residue	1	1.66	1.66				45.4	3.85		8.04	50.91				9.34	82.62								44.88	6.27	34.12	5.93	0.77		18.03				15								#DIV/0!	0	180	280
https://www.sciencedirect.com/science/article/pii/S0048969720367474	Hong	2021	penicillin fermentation residue	1	1.66	1.66				45.4	3.85		8.04	50.91				9.34	82.62								44.88	6.27	34.12	5.93	0.77		18.03				15								#DIV/0!	0	180	280
https://www.sciencedirect.com/science/article/pii/S0048969720367474	Hong	2021	penicillin fermentation residue	1	1.66	1.66				45.4	3.85		8.04	50.91				9.34	82.62								44.88	6.27	34.12	5.93	0.77		18.03				15								#DIV/0!	0	180	280
https://www.sciencedirect.com/science/article/pii/S0048969720367474	Hong	2021	penicillin fermentation residue	1	1.66	1.66				45.4	3.85		8.04	50.91				9.34	82.62								44.88	6.27	34.12	5.93	0.77		18.03				15								#DIV/0!	0	180	280
https://www.sciencedirect.com/science/article/pii/S0048969720367474	Hong	2021	penicillin fermentation residue	1	1.66	1.66				45.4	3.85		8.04	50.91				9.34	82.62								44.88	6.27	34.12	5.93	0.77		18.03				15								#DIV/0!	0	180	280
https://www.sciencedirect.com/science/article/pii/S1385894721028096	Obeid	2022	Sewage sludge	1	19.4	19.4				8.7	18	1.3	43	47.4													14.61	1.88	82.12	1.39				0.011		3.85	30	125			1.44				1.59552	1.59552	5	250
https://www.sciencedirect.com/science/article/pii/S1385894721028096	Obeid	2022	Sewage sludge	1	19.4	19.4				8.7	18	1.3	43	47.4													14.61	1.88	82.12	1.39				0.011		3.85	30	125			1.44				1.59552	1.59552	10	250
https://www.sciencedirect.com/science/article/pii/S1385894721028096	Obeid	2022	Sewage sludge	1	19.4	19.4				8.7	18	1.3	43	47.4													14.61	1.88	82.12	1.39				0.011		3.85	30	125			1.44				1.59552	1.59552	20	250
https://www.sciencedirect.com/science/article/pii/S1385894721028096	Obeid	2022	Sewage sludge	1	19.4	19.4				8.7	18	1.3	43	47.4													14.61	1.88	82.12	1.39				0.011		3.85	30	125			1.44				1.59552	1.59552	30	250
https://www.sciencedirect.com/science/article/pii/S1385894721028096	Obeid	2022	Sewage sludge	1	19.4	19.4				8.7	18	1.3	43	47.4													14.61	1.88	82.12	1.39				0.011		3.85	30	125			1.44				1.59552	1.59552	60	250
https://www.sciencedirect.com/science/article/pii/S1385894721028096	Obeid	2022	Sewage sludge	1	19.4	19.4				8.7	18	1.3	43	47.4													14.61	1.88	82.12	1.39				0.011		3.85	30	125			1.44				1.59611	1.59611	5	300
https://www.sciencedirect.com/science/article/pii/S1385894721028096	Obeid	2022	Sewage sludge	1	19.4	19.4				8.7	18	1.3	43	47.4													14.61	1.88	82.12	1.39				0.011		3.85	30	125			1.44				1.59611	1.59611	10	300
https://www.sciencedirect.com/science/article/pii/S1385894721028096	Obeid	2022	Sewage sludge	1	19.4	19.4				8.7	18	1.3	43	47.4													14.61	1.88	82.12	1.39				0.011		3.85	30	125			1.44				1.59611	1.59611	20	300
https://www.sciencedirect.com/science/article/pii/S1385894721028096	Obeid	2022	Sewage sludge	1	19.4	19.4				8.7	18	1.3	43	47.4													14.61	1.88	82.12	1.39				0.011		3.85	30	125			1.44				1.59611	1.59611	30	300
https://www.sciencedirect.com/science/article/pii/S1385894721028096	Obeid	2022	Sewage sludge	1	19.4	19.4				8.7	18	1.3	43	47.4													14.61	1.88	82.12	1.39				0.011		3.85	30	125			1.44				1.59611	1.59611	60	300
https://www.sciencedirect.com/science/article/pii/S1385894721028096	Obeid	2022	Sewage sludge	1	19.4	19.4				8.7	18	1.3	43	47.4													14.61	1.88	82.12	1.39				0.011		3.85	30	125			1.44				1.59652	1.59652	5	350
https://www.sciencedirect.com/science/article/pii/S1385894721028096	Obeid	2022	Sewage sludge	1	19.4	19.4				8.7	18	1.3	43	47.4													14.61	1.88	82.12	1.39				0.011		3.85	30	125			1.44				1.59652	1.59652	10	350
https://www.sciencedirect.com/science/article/pii/S1385894721028096	Obeid	2022	Sewage sludge	1	19.4	19.4				8.7	18	1.3	43	47.4													14.61	1.88	82.12	1.39				0.011		3.85	30	125			1.44				1.59652	1.59652	20	350
https://www.sciencedirect.com/science/article/pii/S1385894721028096	Obeid	2022	Sewage sludge	1	19.4	19.4				8.7	18	1.3	43	47.4													14.61	1.88	82.12	1.39				0.011		3.85	30	125			1.44				1.59652	1.59652	30	350
https://www.sciencedirect.com/science/article/pii/S1385894721028096	Obeid	2022	Sewage sludge	1	19.4	19.4				8.7	18	1.3	43	47.4													14.61	1.88	82.12	1.39				0.011		3.85	30	125			1.44				1.59652	1.59652	60	350
https://www.sciencedirect.com/science/article/pii/S1385894721028096	Obeid	2022	Radiata pine wood saw dust	1	66.9	66.9				0.5	2.8	19.5	1.4	89.7													44.68	2.45	52.81	0.06				0.011		3.85	30	125			1.44				1.59552	1.59552	5	250
https://www.sciencedirect.com/science/article/pii/S1385894721028096	Obeid	2022	Radiata pine wood saw dust	1	66.9	66.9				0.5	2.8	19.5	1.4	89.7													44.68	2.45	52.81	0.06				0.011		3.85	30	125			1.44				1.59552	1.59552	10	250
https://www.sciencedirect.com/science/article/pii/S1385894721028096	Obeid	2022	Radiata pine wood saw dust	1	66.9	66.9				0.5	2.8	19.5	1.4	89.7													44.68	2.45	52.81	0.06				0.011		3.85	30	125			1.44				1.59552	1.59552	20	250
https://www.sciencedirect.com/science/article/pii/S1385894721028096	Obeid	2022	Radiata pine wood saw dust	1	66.9	66.9				0.5	2.8	19.5	1.4	89.7													44.68	2.45	52.81	0.06				0.011		3.85	30	125			1.44				1.59552	1.59552	30	250
https://www.sciencedirect.com/science/article/pii/S1385894721028096	Obeid	2022	Radiata pine wood saw dust	1	66.9	66.9				0.5	2.8	19.5	1.4	89.7													44.68	2.45	52.81	0.06				0.011		3.85	30	125			1.44				1.59552	1.59552	60	250
https://www.sciencedirect.com/science/article/pii/S1385894721028096	Obeid	2022	Radiata pine wood saw dust	1	66.9	66.9				0.5	2.8	19.5	1.4	89.7													44.68	2.45	52.81	0.06				0.011		3.85	30	125			1.44				1.59611	1.59611	5	300
https://www.sciencedirect.com/science/article/pii/S1385894721028096	Obeid	2022	Radiata pine wood saw dust	1	66.9	66.9				0.5	2.8	19.5	1.4	89.7													44.68	2.45	52.81	0.06				0.011		3.85	30	125			1.44				1.59611	1.59611	10	300
https://www.sciencedirect.com/science/article/pii/S1385894721028096	Obeid	2022	Radiata pine wood saw dust	1	66.9	66.9				0.5	2.8	19.5	1.4	89.7													44.68	2.45	52.81	0.06				0.011		3.85	30	125			1.44				1.59611	1.59611	20	300
https://www.sciencedirect.com/science/article/pii/S1385894721028096	Obeid	2022	Radiata pine wood saw dust	1	66.9	66.9				0.5	2.8	19.5	1.4	89.7													44.68	2.45	52.81	0.06				0.011		3.85	30	125			1.44				1.59611	1.59611	30	300
https://www.sciencedirect.com/science/article/pii/S1385894721028096	Obeid	2022	Radiata pine wood saw dust	1	66.9	66.9				0.5	2.8	19.5	1.4	89.7													44.68	2.45	52.81	0.06				0.011		3.85	30	125			1.44				1.59611	1.59611	60	300
https://www.sciencedirect.com/science/article/pii/S1385894721028096	Obeid	2022	Radiata pine wood saw dust	1	66.9	66.9				0.5	2.8	19.5	1.4	89.7													44.68	2.45	52.81	0.06				0.011		3.85	30	125			1.44				1.59652	1.59652	5	350
https://www.sciencedirect.com/science/article/pii/S1385894721028096	Obeid	2022	Radiata pine wood saw dust	1	66.9	66.9				0.5	2.8	19.5	1.4	89.7													44.68	2.45	52.81	0.06				0.011		3.85	30	125			1.44				1.59652	1.59652	10	350
https://www.sciencedirect.com/science/article/pii/S1385894721028096	Obeid	2022	Radiata pine wood saw dust	1	66.9	66.9				0.5	2.8	19.5	1.4	89.7													44.68	2.45	52.81	0.06				0.011		3.85	30	125			1.44				1.59652	1.59652	20	350
https://www.sciencedirect.com/science/article/pii/S1385894721028096	Obeid	2022	Radiata pine wood saw dust	1	66.9	66.9				0.5	2.8	19.5	1.4	89.7													44.68	2.45	52.81	0.06				0.011		3.85	30	125			1.44				1.59652	1.59652	30	350
https://www.sciencedirect.com/science/article/pii/S1385894721028096	Obeid	2022	Radiata pine wood saw dust	1	66.9	66.9				0.5	2.8	19.5	1.4	89.7													44.68	2.45	52.81	0.06				0.011		3.85	30	125			1.44				1.59652	1.59652	60	350
https://www.sciencedirect.com/science/article/pii/S0921344921001713	Dandamudi	2021	Swine manure	1									35.75					12.2	52.05			63.79					33.54	4.99	57.74	37.73	0		12.15				20							30	#DIV/0!	0	30	330
https://www.sciencedirect.com/science/article/pii/S0921344921001713	Dandamudi	2021	Algae-Swine manure 80-20	1																							47.94	5.766	39.948	12.25	0.888		18.214				20							30	#DIV/0!	0	30	330
https://www.sciencedirect.com/science/article/pii/S0921344921001713	Dandamudi	2021	Algae-Swine manure 50-50	1																							42.54	5.475	46.62	21.805	0.555		15.94				20							30	#DIV/0!	0	30	330
https://www.sciencedirect.com/science/article/pii/S0921344921001713	Dandamudi	2021	Algae-Swine manure 20-80	1																							37.14	5.184	53.292	31.36	0.222		13.666				20							30	#DIV/0!	0	30	330
https://www.sciencedirect.com/science/article/abs/pii/S2589014X21000566?via%3Dihub	Carpio	2021	wastewater algal biomass Untreated	1	17.9			11.4	6.5	38.27	0.19	29.9	25.7	86.26													40.04	4.62	24.02	5.63			15.84	0.1	30	100	25				1			0	2.29774	2.29774	2.29774	260
https://www.sciencedirect.com/science/article/abs/pii/S2589014X21000566?via%3Dihub	Carpio	2021	wastewater algal biomass Untreated	1	17.9			11.4	6.5	38.27	0.19	29.9	25.7	86.26													40.04	4.62	24.02	5.63			15.84	0.1	30	100	25				1			0	2.29809	2.29809	2.29809	280
https://www.sciencedirect.com/science/article/abs/pii/S2589014X21000566?via%3Dihub	Carpio	2021	wastewater algal biomass Untreated	1	17.9			11.4	6.5	38.27	0.19	29.9	25.7	86.26													40.04	4.62	24.02	5.63			15.84	0.1	30	100	25				1			0	2.29839	2.29839	2.29839	300
https://www.sciencedirect.com/science/article/abs/pii/S2589014X21000566?via%3Dihub	Carpio	2021	wastewater algal biomass Untreated	1	17.9			11.4	6.5	38.27	0.19	29.9	25.7	86.26													40.04	4.62	24.02	5.63			15.84	0.1	30	100	25				1			0	2.29866	2.29866	2.29866	320
https://www.sciencedirect.com/science/article/abs/pii/S2589014X21000566?via%3Dihub	Carpio	2021	wastewater algal biomass Untreated	1	17.9			11.4	6.5	38.27	0.19	29.9	25.7	86.26													40.04	4.62	24.02	5.63			15.84	0.1	30	100	25							30	#DIV/0!	0	30	260
https://www.sciencedirect.com/science/article/abs/pii/S2589014X21000566?via%3Dihub	Carpio	2021	wastewater algal biomass Untreated	1	17.9			11.4	6.5	38.27	0.19	29.9	25.7	86.26													40.04	4.62	24.02	5.63			15.84	0.1	30	100	25							30	#DIV/0!	0	30	280
https://www.sciencedirect.com/science/article/abs/pii/S2589014X21000566?via%3Dihub	Carpio	2021	wastewater algal biomass Untreated	1	17.9			11.4	6.5	38.27	0.19	29.9	25.7	86.26													40.04	4.62	24.02	5.63			15.84	0.1	30	100	25							30	#DIV/0!	0	30	300
https://www.sciencedirect.com/science/article/abs/pii/S2589014X21000566?via%3Dihub	Carpio	2021	wastewater algal biomass Untreated	1	17.9			11.4	6.5	38.27	0.19	29.9	25.7	86.26													40.04	4.62	24.02	5.63			15.84	0.1	30	100	25							30	#DIV/0!	0	30	320
https://www.sciencedirect.com/science/article/abs/pii/S2589014X21000566?via%3Dihub	Carpio	2021	wastewater algal biomass Untreated	1	17.9			11.4	6.5	38.27	0.19	29.9	25.7	86.26													40.04	4.62	24.02	5.63			15.84	0.1	30	100	25							60	#DIV/0!	0	60	260
https://www.sciencedirect.com/science/article/abs/pii/S2589014X21000566?via%3Dihub	Carpio	2021	wastewater algal biomass Untreated	1	17.9			11.4	6.5	38.27	0.19	29.9	25.7	86.26													40.04	4.62	24.02	5.63			15.84	0.1	30	100	25							60	#DIV/0!	0	60	280
https://www.sciencedirect.com/science/article/abs/pii/S2589014X21000566?via%3Dihub	Carpio	2021	wastewater algal biomass Untreated	1	17.9			11.4	6.5	38.27	0.19	29.9	25.7	86.26													40.04	4.62	24.02	5.63			15.84	0.1	30	100	25							60	#DIV/0!	0	60	300
https://www.sciencedirect.com/science/article/abs/pii/S2589014X21000566?via%3Dihub	Carpio	2021	wastewater algal biomass Untreated	1	17.9			11.4	6.5	38.27	0.19	29.9	25.7	86.26													40.04	4.62	24.02	5.63			15.84	0.1	30	100	25							60	#DIV/0!	0	60	320
https://www.sciencedirect.com/science/article/abs/pii/S2589014X21000566?via%3Dihub	Carpio	2021	wastewater algal biomass Untreated	1	17.9			11.4	6.5	38.27	0.19	29.9	25.7	86.26													40.04	4.62	24.02	5.63			15.84	0.1	30	100	25							90	#DIV/0!	0	90	260
https://www.sciencedirect.com/science/article/abs/pii/S2589014X21000566?via%3Dihub	Carpio	2021	wastewater algal biomass Untreated	1	17.9			11.4	6.5	38.27	0.19	29.9	25.7	86.26													40.04	4.62	24.02	5.63			15.84	0.1	30	100	25							90	#DIV/0!	0	90	280
https://www.sciencedirect.com/science/article/abs/pii/S2589014X21000566?via%3Dihub	Carpio	2021	wastewater algal biomass Untreated	1	17.9			11.4	6.5	38.27	0.19	29.9	25.7	86.26													40.04	4.62	24.02	5.63			15.84	0.1	30	100	25							90	#DIV/0!	0	90	300
https://www.sciencedirect.com/science/article/abs/pii/S2589014X21000566?via%3Dihub	Carpio	2021	wastewater algal biomass Untreated	1	17.9			11.4	6.5	38.27	0.19	29.9	25.7	86.26													40.04	4.62	24.02	5.63			15.84	0.1	30	100	25							90	#DIV/0!	0	90	320
https://www.sciencedirect.com/science/article/pii/S0960852421009718	Liu	2021	corn stover	1									3.17				3.12	13.28	80.44								45.69	5.31	47.96	0.49	0.55		17.34	0.01	0.6	6	9.09091							16	#DIV/0!	0	16	400
https://www.sciencedirect.com/science/article/pii/S0960852421009718	Liu	2021	corn stover-cow manure 2:1	1									5.46				2.62	14.2133	77.7133								45.1133	5.13333	48.29	0.75	0.713333		16.8133	0.01	0.6	6	9.09091							16	#DIV/0!	0	16	400
https://www.sciencedirect.com/science/article/pii/S0960852421009718	Liu	2021	corn stover-cow manure 1:1	1									6.605				2.37	14.68	76.35								44.825	5.045	48.455	0.88	0.795		16.55	0.01	0.6	6	9.09091							16	#DIV/0!	0	16	400
https://www.sciencedirect.com/science/article/pii/S0960852421009718	Liu	2021	corn stover-cow manure 1:2	1									7.75				2.12	15.1467	74.9867								44.5367	4.95667	48.62	1.01	0.876667		16.2867	0.01	0.6	6	9.09091							16	#DIV/0!	0	16	400
https://www.sciencedirect.com/science/article/pii/S0960852421009718	Liu	2021	cow manure	1									10.04				1.62	16.08	72.26								43.96	4.78	48.95	1.27	1.04		15.76	0.01	0.6	6	9.09091							16	#DIV/0!	0	16	400
https://www.sciencedirect.com/science/article/pii/S0960852421009718	Liu	2021	corn stover-cow manure 1:1	1									6.605				2.37	14.68	76.35								44.825	5.045	48.455	0.88	0.795		16.55	0.01	0.6	6	9.09091							12	#DIV/0!	0	12	400
https://www.sciencedirect.com/science/article/pii/S0960852421009718	Liu	2021	corn stover-cow manure 1:1	1									6.605				2.37	14.68	76.35								44.825	5.045	48.455	0.88	0.795		16.55	0.01	0.6	6	9.09091							14	#DIV/0!	0	14	400
https://www.sciencedirect.com/science/article/pii/S0960852421009718	Liu	2021	corn stover-cow manure 1:1	1									6.605				2.37	14.68	76.35								44.825	5.045	48.455	0.88	0.795		16.55	0.01	0.6	6	9.09091							18	#DIV/0!	0	18	400
https://www.sciencedirect.com/science/article/pii/S0960852421009718	Liu	2021	corn stover-cow manure 1:1	1									6.605				2.37	14.68	76.35								44.825	5.045	48.455	0.88	0.795		16.55	0.01	0.6	6	9.09091							20	#DIV/0!	0	20	400
https://www.sciencedirect.com/science/article/pii/S0960852421009718	Liu	2021	corn stover-cow manure 1:1	1									6.605				2.37	14.68	76.35								44.825	5.045	48.455	0.88	0.795		16.55	0.01	0.6	6	9.09091							30	#DIV/0!	0	30	400
https://www.sciencedirect.com/science/article/pii/S0960852421009718	Liu	2021	corn stover-cow manure 1:1	1									6.605				2.37	14.68	76.35								44.825	5.045	48.455	0.88	0.795		16.55	0.01	0.6	6	9.09091							16	#DIV/0!	0	16	375
https://www.sciencedirect.com/science/article/pii/S0960852421009718	Liu	2021	corn stover-cow manure 1:1	1									6.605				2.37	14.68	76.35								44.825	5.045	48.455	0.88	0.795		16.55	0.01	0.6	6	9.09091							16	#DIV/0!	0	16	425
https://www.sciencedirect.com/science/article/pii/S0960852421009718	Liu	2021	corn stover-cow manure 1:1	1									6.605				2.37	14.68	76.35								44.825	5.045	48.455	0.88	0.795		16.55	0.01	0.6	6	9.09091							16	#DIV/0!	0	16	450
https://www.sciencedirect.com/science/article/pii/S0165237021000620	He	2021	corn cob	0	80.87			35.2	45.67			6.84	4.25	87.71			3.04	14.39	78.32								44.11	7.98	46.75	0.7	0.46		17.219	0.1	9	51	15							30	#DIV/0!	0	30	300
https://www.sciencedirect.com/science/article/pii/S0165237021000620	He	2021	corn cob	0	80.87			35.2	45.67			6.84	4.25	87.71			3.04	14.39	78.32								44.11	7.98	46.75	0.7	0.46		17.219	0.1	9	51	15							30	#DIV/0!	0	30	320
https://www.sciencedirect.com/science/article/pii/S0165237021000620	He	2021	corn cob	0	80.87			35.2	45.67			6.84	4.25	87.71			3.04	14.39	78.32								44.11	7.98	46.75	0.7	0.46		17.219	0.1	9	51	15							30	#DIV/0!	0	30	340
https://www.sciencedirect.com/science/article/pii/S0165237021000620	He	2021	corn cob	0	80.87			35.2	45.67			6.84	4.25	87.71			3.04	14.39	78.32								44.11	7.98	46.75	0.7	0.46		17.219	0.1	9	51	15							30	#DIV/0!	0	30	360
https://www.sciencedirect.com/science/article/pii/S0165237021000620	He	2021	cattle manure	1	12.88			12.84	0.04	16.78	0.8	18.28	34.88	48.74			6.75	5.41	52.96								30.96	2.34	63.62	2.67	0.41		12.008	0.1	9	51	15							30	#DIV/0!	0	30	300
https://www.sciencedirect.com/science/article/pii/S0165237021000620	He	2021	cattle manure	1	12.88			12.84	0.04	16.78	0.8	18.28	34.88	48.74			6.75	5.41	52.96								30.96	2.34	63.62	2.67	0.41		12.008	0.1	9	51	15							30	#DIV/0!	0	30	320
https://www.sciencedirect.com/science/article/pii/S0165237021000620	He	2021	cattle manure	1	12.88			12.84	0.04	16.78	0.8	18.28	34.88	48.74			6.75	5.41	52.96								30.96	2.34	63.62	2.67	0.41		12.008	0.1	9	51	15							30	#DIV/0!	0	30	340
https://www.sciencedirect.com/science/article/pii/S0165237021000620	He	2021	cattle manure	1	12.88			12.84	0.04	16.78	0.8	18.28	34.88	48.74			6.75	5.41	52.96								30.96	2.34	63.62	2.67	0.41		12.008	0.1	9	51	15							30	#DIV/0!	0	30	360
https://www.sciencedirect.com/science/article/pii/S0165237021000620	He	2021	cattle manure-corn cob 1-1	1	46.875			24.02	22.855	8.39	0.4	12.56	19.565	68.225			4.895	9.9	65.64								37.535	5.16	55.185	1.685	0.435		14.6135	0.1	9	51	15							30	#DIV/0!	0	30	300
https://www.sciencedirect.com/science/article/pii/S0165237021000620	He	2021	cattle manure-corn cob 1-1	1	46.875			24.02	22.855	8.39	0.4	12.56	19.565	68.225			4.895	9.9	65.64								37.535	5.16	55.185	1.685	0.435		14.6135	0.1	9	51	15							30	#DIV/0!	0	30	320
https://www.sciencedirect.com/science/article/pii/S0165237021000620	He	2021	cattle manure-corn cob 1-1	1	46.875			24.02	22.855	8.39	0.4	12.56	19.565	68.225			4.895	9.9	65.64								37.535	5.16	55.185	1.685	0.435		14.6135	0.1	9	51	15							30	#DIV/0!	0	30	340
https://www.sciencedirect.com/science/article/pii/S0165237021000620	He	2021	cattle manure-corn cob 1-1	1	46.875			24.02	22.855	8.39	0.4	12.56	19.565	68.225			4.895	9.9	65.64								37.535	5.16	55.185	1.685	0.435		14.6135	0.1	9	51	15							30	#DIV/0!	0	30	360
https://www.sciencedirect.com/science/article/pii/S0959652622000178	Hossain	2022	peat	1	54.47	54.47				12.85	5.22		1.83	72.54			91.93	1.85	4.37								35.63	5.21	33.53	2.05			14.23	0.01			8							60	#DIV/0!	0	60	300
https://www.sciencedirect.com/science/article/pii/S0959652622000178	Hossain	2022	peat-Faecal sludge 75-25	1	43.965	43.965				14.525	8.2425		2.555	66.7325			90.98	1.5225	4.925								33.61	4.905	32.035	1.845			13.285	0.01			10							60	#DIV/0!	0	60	300
https://www.sciencedirect.com/science/article/pii/S0959652622000178	Hossain	2022	peat-Faecal sludge 50-50	1	33.46	33.46				16.2	11.265		3.28	60.925			90.03	1.195	5.48								31.59	4.6	30.54	1.64			12.34	0.01			10							60	#DIV/0!	0	60	300
https://www.sciencedirect.com/science/article/pii/S0959652622000178	Hossain	2022	peat-Faecal sludge 25-75	1	22.955	22.955				17.875	14.2875		4.005	55.1175			89.08	0.8675	6.035								29.57	4.295	29.045	1.435			11.395	0.01			10							60	#DIV/0!	0	60	300
https://www.sciencedirect.com/science/article/pii/S0959652622000178	Hossain	2022	Faecal sludge	1	12.45	12.45				19.55	17.31		4.73	49.31			88.13	0.54	6.59								27.55	3.99	27.55	1.23			10.45	0.01			10							60	#DIV/0!	0	60	300
https://www.sciencedirect.com/science/article/pii/S0306261919319993	Qain	2020	sewage sludge	1													97.8					80.1	3.8	15.4			46.5	6.99	33.3	2.14	0.85		19.2	0.0041											#DIV/0!	0	1	199.3
https://www.sciencedirect.com/science/article/pii/S0306261919319993	Qain	2020	sewage sludge	1													97.8					80.1	3.8	15.4			46.5	6.99	33.3	2.14	0.85		19.2	0.0041											#DIV/0!	0	2	263.1
https://www.sciencedirect.com/science/article/pii/S0306261919319993	Qain	2020	sewage sludge	1													97.8					80.1	3.8	15.4			46.5	6.99	33.3	2.14	0.85		19.2	0.0041											#DIV/0!	0	3	285.7
https://www.sciencedirect.com/science/article/pii/S0306261919319993	Qain	2020	sewage sludge	1													97.8					80.1	3.8	15.4			46.5	6.99	33.3	2.14	0.85		19.2	0.0041											#DIV/0!	0	4	293.5
https://www.sciencedirect.com/science/article/pii/S0306261919319993	Qain	2020	sewage sludge	1													97.8					80.1	3.8	15.4			46.5	6.99	33.3	2.14	0.85		19.2	0.0041											#DIV/0!	0	5	300
https://www.sciencedirect.com/science/article/pii/S0306261919319993	Qain	2020	sewage sludge	1													97.8					80.1	3.8	15.4			46.5	6.99	33.3	2.14	0.85		19.2	0.0041											#DIV/0!	0	10	300
https://www.sciencedirect.com/science/article/pii/S0306261919319993	Qain	2020	sewage sludge	1													97.8					80.1	3.8	15.4			46.5	6.99	33.3	2.14	0.85		19.2	0.0041											#DIV/0!	0	20	300
https://www.sciencedirect.com/science/article/pii/S0306261919319993	Qain	2020	sewage sludge	1													97.8					80.1	3.8	15.4			46.5	6.99	33.3	2.14	0.85		19.2	0.0041											#DIV/0!	0	40	300
https://www.sciencedirect.com/science/article/pii/S0306261919319993	Qain	2020	sewage sludge	1													97.8					80.1	3.8	15.4			46.5	6.99	33.3	2.14	0.85		19.2	0.0041											#DIV/0!	0	60	300
https://www.sciencedirect.com/science/article/pii/S0306261919319993	Qain	2020	sewage sludge	1													97.8					80.1	3.8	15.4			46.5	6.99	33.3	2.14	0.85		19.2	0.0041											#DIV/0!	0	1	274.3
https://www.sciencedirect.com/science/article/pii/S0306261919319993	Qain	2020	sewage sludge	1													97.8					80.1	3.8	15.4			46.5	6.99	33.3	2.14	0.85		19.2	0.0041											#DIV/0!	0	2	329.9
https://www.sciencedirect.com/science/article/pii/S0306261919319993	Qain	2020	sewage sludge	1													97.8					80.1	3.8	15.4			46.5	6.99	33.3	2.14	0.85		19.2	0.0041											#DIV/0!	0	3	344.8
https://www.sciencedirect.com/science/article/pii/S0306261919319993	Qain	2020	sewage sludge	1													97.8					80.1	3.8	15.4			46.5	6.99	33.3	2.14	0.85		19.2	0.0041											#DIV/0!	0	4	350
https://www.sciencedirect.com/science/article/pii/S0306261919319993	Qain	2020	sewage sludge	1													97.8					80.1	3.8	15.4			46.5	6.99	33.3	2.14	0.85		19.2	0.0041											#DIV/0!	0	5	350
https://www.sciencedirect.com/science/article/pii/S0306261919319993	Qain	2020	sewage sludge	1													97.8					80.1	3.8	15.4			46.5	6.99	33.3	2.14	0.85		19.2	0.0041											#DIV/0!	0	10	350
https://www.sciencedirect.com/science/article/pii/S0306261919319993	Qain	2020	sewage sludge	1													97.8					80.1	3.8	15.4			46.5	6.99	33.3	2.14	0.85		19.2	0.0041											#DIV/0!	0	20	350
https://www.sciencedirect.com/science/article/pii/S0306261919319993	Qain	2020	sewage sludge	1													97.8					80.1	3.8	15.4			46.5	6.99	33.3	2.14	0.85		19.2	0.0041											#DIV/0!	0	40	350
https://www.sciencedirect.com/science/article/pii/S0306261919319993	Qain	2020	sewage sludge	1													97.8					80.1	3.8	15.4			46.5	6.99	33.3	2.14	0.85		19.2	0.0041											#DIV/0!	0	60	350
https://www.sciencedirect.com/science/article/pii/S0306261919319993	Qain	2020	sewage sludge	1													97.8					80.1	3.8	15.4			46.5	6.99	33.3	2.14	0.85		19.2	0.0041											#DIV/0!	0	1	309.9
https://www.sciencedirect.com/science/article/pii/S0306261919319993	Qain	2020	sewage sludge	1													97.8					80.1	3.8	15.4			46.5	6.99	33.3	2.14	0.85		19.2	0.0041											#DIV/0!	0	2	373.1
https://www.sciencedirect.com/science/article/pii/S0306261919319993	Qain	2020	sewage sludge	1													97.8					80.1	3.8	15.4			46.5	6.99	33.3	2.14	0.85		19.2	0.0041											#DIV/0!	0	3	392.1
https://www.sciencedirect.com/science/article/pii/S0306261919319993	Qain	2020	sewage sludge	1													97.8					80.1	3.8	15.4			46.5	6.99	33.3	2.14	0.85		19.2	0.0041											#DIV/0!	0	4	400
https://www.sciencedirect.com/science/article/pii/S0306261919319993	Qain	2020	sewage sludge	1													97.8					80.1	3.8	15.4			46.5	6.99	33.3	2.14	0.85		19.2	0.0041											#DIV/0!	0	5	400
https://www.sciencedirect.com/science/article/pii/S0306261919319993	Qain	2020	sewage sludge	1													97.8					80.1	3.8	15.4			46.5	6.99	33.3	2.14	0.85		19.2	0.0041											#DIV/0!	0	10	400
https://www.sciencedirect.com/science/article/pii/S0306261919319993	Qain	2020	sewage sludge	1													97.8					80.1	3.8	15.4			46.5	6.99	33.3	2.14	0.85		19.2	0.0041											#DIV/0!	0	20	400
https://www.sciencedirect.com/science/article/pii/S0306261919319993	Qain	2020	sewage sludge	1													97.8					80.1	3.8	15.4			46.5	6.99	33.3	2.14	0.85		19.2	0.0041											#DIV/0!	0	40	400
https://www.sciencedirect.com/science/article/pii/S0306261919319993	Qain	2020	sewage sludge	1													97.8					80.1	3.8	15.4			46.5	6.99	33.3	2.14	0.85		19.2	0.0041											#DIV/0!	0	60	400
https://www.sciencedirect.com/science/article/pii/S0306261919319993	Qain	2020	sewage sludge	1													97.8					80.1	3.8	15.4			46.5	6.99	33.3	2.14	0.85		19.2	0.0041											#DIV/0!	0	1	420.4
https://www.sciencedirect.com/science/article/pii/S0306261919319993	Qain	2020	sewage sludge	1													97.8					80.1	3.8	15.4			46.5	6.99	33.3	2.14	0.85		19.2	0.0041											#DIV/0!	0	2	482.2
https://www.sciencedirect.com/science/article/pii/S0306261919319993	Qain	2020	sewage sludge	1													97.8					80.1	3.8	15.4			46.5	6.99	33.3	2.14	0.85		19.2	0.0041											#DIV/0!	0	3	492.9
https://www.sciencedirect.com/science/article/pii/S0306261919319993	Qain	2020	sewage sludge	1													97.8					80.1	3.8	15.4			46.5	6.99	33.3	2.14	0.85		19.2	0.0041											#DIV/0!	0	4	500
https://www.sciencedirect.com/science/article/pii/S0306261919319993	Qain	2020	sewage sludge	1													97.8					80.1	3.8	15.4			46.5	6.99	33.3	2.14	0.85		19.2	0.0041											#DIV/0!	0	5	500
https://www.sciencedirect.com/science/article/pii/S0306261919319993	Qain	2020	sewage sludge	1													97.8					80.1	3.8	15.4			46.5	6.99	33.3	2.14	0.85		19.2	0.0041											#DIV/0!	0	10	500
https://www.sciencedirect.com/science/article/pii/S0306261919319993	Qain	2020	sewage sludge	1													97.8					80.1	3.8	15.4			46.5	6.99	33.3	2.14	0.85		19.2	0.0041											#DIV/0!	0	20	500
https://www.sciencedirect.com/science/article/pii/S0306261919319993	Qain	2020	sewage sludge	1													97.8					80.1	3.8	15.4			46.5	6.99	33.3	2.14	0.85		19.2	0.0041											#DIV/0!	0	40	500
https://www.sciencedirect.com/science/article/pii/S0306261919319993	Qain	2020	sewage sludge	1													97.8					80.1	3.8	15.4			46.5	6.99	33.3	2.14	0.85		19.2	0.0041											#DIV/0!	0	60	500
https://www.sciencedirect.com/science/article/pii/S0306261919319993	Qain	2020	sewage sludge	1													97.8					80.1	3.8	15.4			46.5	6.99	33.3	2.14	0.85		19.2	0.0041											#DIV/0!	0	1	469.4
https://www.sciencedirect.com/science/article/pii/S0306261919319993	Qain	2020	sewage sludge	1													97.8					80.1	3.8	15.4			46.5	6.99	33.3	2.14	0.85		19.2	0.0041											#DIV/0!	0	2	566
https://www.sciencedirect.com/science/article/pii/S0306261919319993	Qain	2020	sewage sludge	1													97.8					80.1	3.8	15.4			46.5	6.99	33.3	2.14	0.85		19.2	0.0041											#DIV/0!	0	3	589.3
https://www.sciencedirect.com/science/article/pii/S0306261919319993	Qain	2020	sewage sludge	1													97.8					80.1	3.8	15.4			46.5	6.99	33.3	2.14	0.85		19.2	0.0041											#DIV/0!	0	4	600
https://www.sciencedirect.com/science/article/pii/S0306261919319993	Qain	2020	sewage sludge	1													97.8					80.1	3.8	15.4			46.5	6.99	33.3	2.14	0.85		19.2	0.0041											#DIV/0!	0	5	600
https://www.sciencedirect.com/science/article/pii/S0306261919319993	Qain	2020	sewage sludge	1													97.8					80.1	3.8	15.4			46.5	6.99	33.3	2.14	0.85		19.2	0.0041											#DIV/0!	0	10	600
https://www.sciencedirect.com/science/article/pii/S0306261919319993	Qain	2020	sewage sludge	1													97.8					80.1	3.8	15.4			46.5	6.99	33.3	2.14	0.85		19.2	0.0041											#DIV/0!	0	20	600
https://www.sciencedirect.com/science/article/pii/S0306261919319993	Qain	2020	sewage sludge	1													97.8					80.1	3.8	15.4			46.5	6.99	33.3	2.14	0.85		19.2	0.0041											#DIV/0!	0	40	600
https://www.sciencedirect.com/science/article/pii/S0306261919319993	Qain	2020	sewage sludge	1													97.8					80.1	3.8	15.4			46.5	6.99	33.3	2.14	0.85		19.2	0.0041											#DIV/0!	0	60	600
https://www.sciencedirect.com/science/article/pii/S096014811930655X	Zhang	2019	fresh lemon-peel	0													60										41.2	6.6	51.7	0.5				0.05			13								#DIV/0!	0	35	280
https://www.sciencedirect.com/science/article/pii/S096014811930655X	Zhang	2019	fresh lemon-peel	0													60										41.2	6.6	51.7	0.5				0.05			10								#DIV/0!	0	20	294
https://www.sciencedirect.com/science/article/pii/S096014811930655X	Zhang	2019	fresh lemon-peel	0													60										41.2	6.6	51.7	0.5				0.05			17								#DIV/0!	0	20	294
https://www.sciencedirect.com/science/article/pii/S096014811930655X	Zhang	2019	fresh lemon-peel	0													60										41.2	6.6	51.7	0.5				0.05			10								#DIV/0!	0	50	294
https://www.sciencedirect.com/science/article/pii/S096014811930655X	Zhang	2019	fresh lemon-peel	0													60										41.2	6.6	51.7	0.5				0.05			17								#DIV/0!	0	50	294
https://www.sciencedirect.com/science/article/pii/S096014811930655X	Zhang	2019	fresh lemon-peel	0													60										41.2	6.6	51.7	0.5				0.05			13								#DIV/0!	0	10	315
https://www.sciencedirect.com/science/article/pii/S096014811930655X	Zhang	2019	fresh lemon-peel	0													60										41.2	6.6	51.7	0.5				0.05			7								#DIV/0!	0	35	315
https://www.sciencedirect.com/science/article/pii/S096014811930655X	Zhang	2019	fresh lemon-peel	0													60										41.2	6.6	51.7	0.5				0.05			13								#DIV/0!	0	35	315
https://www.sciencedirect.com/science/article/pii/S096014811930655X	Zhang	2019	fresh lemon-peel	0													60										41.2	6.6	51.7	0.5				0.05			13								#DIV/0!	0	35	315
https://www.sciencedirect.com/science/article/pii/S096014811930655X	Zhang	2019	fresh lemon-peel	0													60										41.2	6.6	51.7	0.5				0.05			13								#DIV/0!	0	35	315
https://www.sciencedirect.com/science/article/pii/S096014811930655X	Zhang	2019	fresh lemon-peel	0													60										41.2	6.6	51.7	0.5				0.05			13								#DIV/0!	0	35	315
https://www.sciencedirect.com/science/article/pii/S096014811930655X	Zhang	2019	fresh lemon-peel	0													60										41.2	6.6	51.7	0.5				0.05			13								#DIV/0!	0	35	315
https://www.sciencedirect.com/science/article/pii/S096014811930655X	Zhang	2019	fresh lemon-peel	0													60										41.2	6.6	51.7	0.5				0.05			13								#DIV/0!	0	35	315
https://www.sciencedirect.com/science/article/pii/S096014811930655X	Zhang	2019	fresh lemon-peel	0													60										41.2	6.6	51.7	0.5				0.05			20								#DIV/0!	0	35	315
https://www.sciencedirect.com/science/article/pii/S096014811930655X	Zhang	2019	fresh lemon-peel	0													60										41.2	6.6	51.7	0.5				0.05			13								#DIV/0!	0	60	315
https://www.sciencedirect.com/science/article/pii/S096014811930655X	Zhang	2019	fresh lemon-peel	0													60										41.2	6.6	51.7	0.5				0.05			10								#DIV/0!	0	20	336
https://www.sciencedirect.com/science/article/pii/S096014811930655X	Zhang	2019	fresh lemon-peel	0													60										41.2	6.6	51.7	0.5				0.05			17								#DIV/0!	0	20	336
https://www.sciencedirect.com/science/article/pii/S096014811930655X	Zhang	2019	fresh lemon-peel	0													60										41.2	6.6	51.7	0.5				0.05			10								#DIV/0!	0	50	336
https://www.sciencedirect.com/science/article/pii/S096014811930655X	Zhang	2019	fresh lemon-peel	0													60										41.2	6.6	51.7	0.5				0.05			17								#DIV/0!	0	50	336
https://www.sciencedirect.com/science/article/pii/S096014811930655X	Zhang	2019	fresh lemon-peel	0													60										41.2	6.6	51.7	0.5				0.05			13								#DIV/0!	0	35	350
https://www.sciencedirect.com/science/article/pii/S0959652620349398	Fan	2021	sewage sludge	1	27.9	27.9				34.6	13.9		38.6	76.4													25.8	4.6	26.6	3.7	0.7		10.5	0.0245			25								#DIV/0!	0	20	250
https://www.sciencedirect.com/science/article/pii/S0959652620349398	Fan	2021	sewage sludge	1	27.9	27.9				34.6	13.9		38.6	76.4													25.8	4.6	26.6	3.7	0.7		10.5	0.0245			25								#DIV/0!	0	20	300
https://www.sciencedirect.com/science/article/pii/S0959652620349398	Fan	2021	sewage sludge	1	27.9	27.9				34.6	13.9		38.6	76.4													25.8	4.6	26.6	3.7	0.7		10.5	0.0245			25								#DIV/0!	0	20	350
https://www.sciencedirect.com/science/article/pii/S0959652620349398	Fan	2021	Lipids Extracted Sewage Sludge	1	31.3	31.3				38.9			45.3	70.2													24	4.1	22.2	3.8	0.6		10	0.0245			25								#DIV/0!	0	20	250
https://www.sciencedirect.com/science/article/pii/S0959652620349398	Fan	2021	Lipids Extracted Sewage Sludge	1	31.3	31.3				38.9			45.3	70.2													24	4.1	22.2	3.8	0.6		10	0.0245			25								#DIV/0!	0	20	300
https://www.sciencedirect.com/science/article/pii/S0959652620349398	Fan	2021	Lipids Extracted Sewage Sludge	1	31.3	31.3				38.9			45.3	70.2													24	4.1	22.2	3.8	0.6		10	0.0245			25								#DIV/0!	0	20	350
https://www.sciencedirect.com/science/article/pii/S1743967118301788	Zhuang	2019	antibiotic wastes	1									8					13.5	78.5								44.6	6.6	33	7.3	0.5		19.06	0.25		100	5	5			0.0735			20	31.2563	31.2563	51.2563	240
https://www.sciencedirect.com/science/article/pii/S1743967118301788	Zhuang	2019	antibiotic wastes	1									8					13.5	78.5								44.6	6.6	33	7.3	0.5		19.06	0.25		100	15	5			0.0735			20	31.2563	31.2563	51.2563	240
https://www.sciencedirect.com/science/article/pii/S1743967118301788	Zhuang	2019	antibiotic wastes	1									8					13.5	78.5								44.6	6.6	33	7.3	0.5		19.06	0.25		100	5	5			0.0735			60	31.2563	31.2563	91.2563	240
https://www.sciencedirect.com/science/article/pii/S1743967118301788	Zhuang	2019	antibiotic wastes	1									8					13.5	78.5								44.6	6.6	33	7.3	0.5		19.06	0.25		100	15	5			0.0735			60	31.2563	31.2563	91.2563	240
https://www.sciencedirect.com/science/article/pii/S1743967118301788	Zhuang	2019	antibiotic wastes	1									8					13.5	78.5								44.6	6.6	33	7.3	0.5		19.06	0.25		100	5	5			0.0735			20	31.2706	31.2706	51.2706	300
https://www.sciencedirect.com/science/article/pii/S1743967118301788	Zhuang	2019	antibiotic wastes	1									8					13.5	78.5								44.6	6.6	33	7.3	0.5		19.06	0.25		100	15	5			0.0735			20	31.2706	31.2706	51.2706	300
https://www.sciencedirect.com/science/article/pii/S1743967118301788	Zhuang	2019	antibiotic wastes	1									8					13.5	78.5								44.6	6.6	33	7.3	0.5		19.06	0.25		100	5	5			0.0735			60	31.2706	31.2706	91.2706	300
https://www.sciencedirect.com/science/article/pii/S1743967118301788	Zhuang	2019	antibiotic wastes	1									8					13.5	78.5								44.6	6.6	33	7.3	0.5		19.06	0.25		100	15	5			0.0735			60	31.2706	31.2706	91.2706	300
https://www.sciencedirect.com/science/article/pii/S1743967118301788	Zhuang	2019	antibiotic wastes	1									8					13.5	78.5								44.6	6.6	33	7.3	0.5		19.06	0.25		100	10	5			0.0735			40	31.2563	31.2563	71.2563	240
https://www.sciencedirect.com/science/article/pii/S1743967118301788	Zhuang	2019	antibiotic wastes	1									8					13.5	78.5								44.6	6.6	33	7.3	0.5		19.06	0.25		100	10	5			0.0735			40	31.2706	31.2706	71.2706	300
https://www.sciencedirect.com/science/article/pii/S1743967118301788	Zhuang	2019	antibiotic wastes	1									8					13.5	78.5								44.6	6.6	33	7.3	0.5		19.06	0.25		100	5	5			0.0735			40	31.2643	31.2643	71.2643	270
https://www.sciencedirect.com/science/article/pii/S1743967118301788	Zhuang	2019	antibiotic wastes	1									8					13.5	78.5								44.6	6.6	33	7.3	0.5		19.06	0.25		100	15	5			0.0735			40	31.2643	31.2643	71.2643	270
https://www.sciencedirect.com/science/article/pii/S1743967118301788	Zhuang	2019	antibiotic wastes	1									8					13.5	78.5								44.6	6.6	33	7.3	0.5		19.06	0.25		100	10	5			0.0735			20	31.2643	31.2643	51.2643	270
https://www.sciencedirect.com/science/article/pii/S1743967118301788	Zhuang	2019	antibiotic wastes	1									8					13.5	78.5								44.6	6.6	33	7.3	0.5		19.06	0.25		100	10	5			0.0735			60	31.2643	31.2643	91.2643	270
https://www.sciencedirect.com/science/article/pii/S1743967118301788	Zhuang	2019	antibiotic wastes	1									8					13.5	78.5								44.6	6.6	33	7.3	0.5		19.06	0.25		100	10	5			0.0735			40	31.2643	31.2643	71.2643	270
https://www.sciencedirect.com/science/article/pii/S1743967118301788	Zhuang	2019	antibiotic wastes	1									8					13.5	78.5								44.6	6.6	33	7.3	0.5		19.06	0.25		100	10	5			0.0735			40	31.2643	31.2643	71.2643	270
https://www.sciencedirect.com/science/article/pii/S1743967118301788	Zhuang	2019	antibiotic wastes	1									8					13.5	78.5								44.6	6.6	33	7.3	0.5		19.06	0.25		100	10	5			0.0735			40	31.2643	31.2643	71.2643	270
https://pubs.acs.org/doi/10.1021/ef401506u	Valdez	2014	E. coli TB	0	7	7				86	0.57		6.82	93.57													46.54	6.69	25.58	13.7	0.67		22	0.0022	1.35		12							60	#DIV/0!	0		350
https://pubs.acs.org/doi/10.1021/ef401506u	Valdez	2014	E. coli MM	0	10	10				82	2.6		4.9	94.6													47.32	6.88	27.15	13.17	0.58		23	0.0022	1.35		12							60	#DIV/0!	0		350
https://pubs.acs.org/doi/10.1021/ef401506u	Valdez	2014	P. putida	0	4	4				83	2.7		11	89.7													46.58	7.08	21.48	13.23	0.55		23	0.0022	1.35		12							60	#DIV/0!	0		350
https://pubs.acs.org/doi/10.1021/ef401506u	Valdez	2014	B. subtilis	0	15	15				72	0.55		13	87.55													42.65	6.56	25.91	11.45	0.43		21	0.0022	1.35		12							60	#DIV/0!	0		350
https://pubs.acs.org/doi/10.1021/ef401506u	Valdez	2014	S. cerevisiae	0	17	17				75	2.7		4.68	94.7													46.47	7.31	29.03	12.04	0.47		22	0.0022	1.35		12							60	#DIV/0!	0		350
https://pubs.acs.org/doi/10.1021/ef401506u	Valdez	2014	E. coli TB	0	7	7				86	0.57		6.82	93.57													46.54	6.69	25.58	13.7	0.67		22	0.0022	0.3		12						1		#DIV/0!	0		600
https://pubs.acs.org/doi/10.1021/ef401506u	Valdez	2014	E. coli MM	0	10	10				82	2.6		4.9	94.6													47.32	6.88	27.15	13.17	0.58		23	0.0022	0.3		12						1		#DIV/0!	0		600
https://pubs.acs.org/doi/10.1021/ef401506u	Valdez	2014	P. putida	0	4	4				83	2.7		11	89.7													46.58	7.08	21.48	13.23	0.55		23	0.0022	0.3		12						1		#DIV/0!	0		600
https://pubs.acs.org/doi/10.1021/ef401506u	Valdez	2014	B. subtilis	0	15	15				72	0.55		13	87.55													42.65	6.56	25.91	11.45	0.43		21	0.0022	0.3		12						1		#DIV/0!	0		600
https://pubs.acs.org/doi/10.1021/ef401506u	Valdez	2014	S. cerevisiae	0	17	17				75	2.7		4.68	94.7													46.47	7.31	29.03	12.04	0.47		22	0.0022	0.3		12						1		#DIV/0!	0		600
https://pubs.acs.org/doi/10.1021/acssuschemeng.6b01857	Sheehan	2016	Soy protein isolate	1						100				100								55	2	43			46.11	6.95	33.28	13.13	0.53			0.00167			10								#DIV/0!	0	30	262
https://pubs.acs.org/doi/10.1021/acssuschemeng.6b01857	Sheehan	2016	Soy protein isolate	1						100				100								55	2	43			46.11	6.95	33.28	13.13	0.53			0.00167			10								#DIV/0!	0	45	308
https://pubs.acs.org/doi/10.1021/acssuschemeng.6b01857	Sheehan	2016	Soy protein isolate	1						100				100								55	2	43			46.11	6.95	33.28	13.13	0.53			0.00167			10								#DIV/0!	0	60	340
https://pubs.acs.org/doi/10.1021/acssuschemeng.6b01857	Sheehan	2016	Soy protein isolate	1						100				100								55	2	43			46.11	6.95	33.28	13.13	0.53			0.00167			10								#DIV/0!	0	90	375
https://pubs.acs.org/doi/10.1021/acssuschemeng.6b01857	Sheehan	2016	Soy protein isolate	1						100				100								55	2	43			46.11	6.95	33.28	13.13	0.53			0.00167			10								#DIV/0!	0	120	389
https://pubs.acs.org/doi/10.1021/acssuschemeng.6b01857	Sheehan	2016	Soy protein isolate	1						100				100								55	2	43			46.11	6.95	33.28	13.13	0.53			0.00167			10								#DIV/0!	0	180	396
https://pubs.acs.org/doi/10.1021/acssuschemeng.6b01857	Sheehan	2016	Soy protein isolate	1						100				100								55	2	43			46.11	6.95	33.28	13.13	0.53			0.00167			10								#DIV/0!	0	300	398
https://pubs.acs.org/doi/10.1021/acssuschemeng.6b01857	Sheehan	2016	Soy protein isolate	1						100				100								55	2	43			46.11	6.95	33.28	13.13	0.53			0.00167			10								#DIV/0!	0	10	162
https://pubs.acs.org/doi/10.1021/acssuschemeng.6b01857	Sheehan	2016	Soy protein isolate	1						100				100								55	2	43			46.11	6.95	33.28	13.13	0.53			0.00167			10								#DIV/0!	0	20	249
https://pubs.acs.org/doi/10.1021/acssuschemeng.6b01857	Sheehan	2016	Soy protein isolate	1						100				100								55	2	43			46.11	6.95	33.28	13.13	0.53			0.00167			10								#DIV/0!	0	30	310
https://pubs.acs.org/doi/10.1021/acssuschemeng.6b01857	Sheehan	2016	Soy protein isolate	1						100				100								55	2	43			46.11	6.95	33.28	13.13	0.53			0.00167			10								#DIV/0!	0	45	370
https://pubs.acs.org/doi/10.1021/acssuschemeng.6b01857	Sheehan	2016	Soy protein isolate	1						100				100								55	2	43			46.11	6.95	33.28	13.13	0.53			0.00167			10								#DIV/0!	0	60	399
https://pubs.acs.org/doi/10.1021/acssuschemeng.6b01857	Sheehan	2016	Soy protein isolate	1						100				100								55	2	43			46.11	6.95	33.28	13.13	0.53			0.00167			10								#DIV/0!	0	90	433
https://pubs.acs.org/doi/10.1021/acssuschemeng.6b01857	Sheehan	2016	Soy protein isolate	1						100				100								55	2	43			46.11	6.95	33.28	13.13	0.53			0.00167			10								#DIV/0!	0	120	443
https://pubs.acs.org/doi/10.1021/acssuschemeng.6b01857	Sheehan	2016	Soy protein isolate	1						100				100								55	2	43			46.11	6.95	33.28	13.13	0.53			0.00167			10								#DIV/0!	0	180	448
https://pubs.acs.org/doi/10.1021/acssuschemeng.6b01857	Sheehan	2016	Soy protein isolate	1						100				100								55	2	43			46.11	6.95	33.28	13.13	0.53			0.00167			10								#DIV/0!	0	300	449
https://pubs.acs.org/doi/10.1021/acssuschemeng.6b01857	Sheehan	2016	Soy protein isolate	1						100				100								55	2	43			46.11	6.95	33.28	13.13	0.53			0.00167			10								#DIV/0!	0	20	254
https://pubs.acs.org/doi/10.1021/acssuschemeng.6b01857	Sheehan	2016	Soy protein isolate	1						100				100								55	2	43			46.11	6.95	33.28	13.13	0.53			0.00167			10								#DIV/0!	0	30	319
https://pubs.acs.org/doi/10.1021/acssuschemeng.6b01857	Sheehan	2016	Soy protein isolate	1						100				100								55	2	43			46.11	6.95	33.28	13.13	0.53			0.00167			10								#DIV/0!	0	45	377
https://pubs.acs.org/doi/10.1021/acssuschemeng.6b01857	Sheehan	2016	Soy protein isolate	1						100				100								55	2	43			46.11	6.95	33.28	13.13	0.53			0.00167			10								#DIV/0!	0	60	410
https://pubs.acs.org/doi/10.1021/acssuschemeng.6b01857	Sheehan	2016	Soy protein isolate	1						100				100								55	2	43			46.11	6.95	33.28	13.13	0.53			0.00167			10								#DIV/0!	0	90	461
https://pubs.acs.org/doi/10.1021/acssuschemeng.6b01857	Sheehan	2016	Soy protein isolate	1						100				100								55	2	43			46.11	6.95	33.28	13.13	0.53			0.00167			10								#DIV/0!	0	120	484
https://pubs.acs.org/doi/10.1021/acssuschemeng.6b01857	Sheehan	2016	Soy protein isolate	1						100				100								55	2	43			46.11	6.95	33.28	13.13	0.53			0.00167			10								#DIV/0!	0	180	498
https://pubs.acs.org/doi/10.1021/acssuschemeng.6b01857	Sheehan	2016	Soy protein isolate	1						100				100								55	2	43			46.11	6.95	33.28	13.13	0.53			0.00167			10								#DIV/0!	0	300	500
https://pubs.acs.org/doi/10.1021/acs.energyfuels.9b03209	Gollakota	2019	chitin	1	100		100							100													44.5	6.6	42.3	6.6			18.7	0.0041			5								#DIV/0!	0	3.2	250
https://pubs.acs.org/doi/10.1021/acs.energyfuels.9b03209	Gollakota	2019	chitin	1	100		100							100													44.5	6.6	42.3	6.6			18.7	0.0041			5								#DIV/0!	0	5.6	250
https://pubs.acs.org/doi/10.1021/acs.energyfuels.9b03209	Gollakota	2019	chitin	1	100		100							100													44.5	6.6	42.3	6.6			18.7	0.0041			5								#DIV/0!	0	10	250
https://pubs.acs.org/doi/10.1021/acs.energyfuels.9b03209	Gollakota	2019	chitin	1	100		100							100													44.5	6.6	42.3	6.6			18.7	0.0041			5								#DIV/0!	0	31.6	250
https://pubs.acs.org/doi/10.1021/acs.energyfuels.9b03209	Gollakota	2019	chitin	1	100		100							100													44.5	6.6	42.3	6.6			18.7	0.0041			5								#DIV/0!	0	100	250
https://pubs.acs.org/doi/10.1021/acs.energyfuels.9b03209	Gollakota	2019	chitin	1	100		100							100													44.5	6.6	42.3	6.6			18.7	0.0041			5								#DIV/0!	0	3.2	350
https://pubs.acs.org/doi/10.1021/acs.energyfuels.9b03209	Gollakota	2019	chitin	1	100		100							100													44.5	6.6	42.3	6.6			18.7	0.0041			5								#DIV/0!	0	5.6	350
https://pubs.acs.org/doi/10.1021/acs.energyfuels.9b03209	Gollakota	2019	chitin	1	100		100							100													44.5	6.6	42.3	6.6			18.7	0.0041			5								#DIV/0!	0	10	350
https://pubs.acs.org/doi/10.1021/acs.energyfuels.9b03209	Gollakota	2019	chitin	1	100		100							100													44.5	6.6	42.3	6.6			18.7	0.0041			5								#DIV/0!	0	31.6	350
https://pubs.acs.org/doi/10.1021/acs.energyfuels.9b03209	Gollakota	2019	chitin	1	100		100							100													44.5	6.6	42.3	6.6			18.7	0.0041			5								#DIV/0!	0	100	350
https://pubs.acs.org/doi/10.1021/acs.energyfuels.9b03209	Gollakota	2019	chitin	1	100		100							100													44.5	6.6	42.3	6.6			18.7	0.0041			5								#DIV/0!	0	1	400
https://pubs.acs.org/doi/10.1021/acs.energyfuels.9b03209	Gollakota	2019	chitin	1	100		100							100													44.5	6.6	42.3	6.6			18.7	0.0041			5								#DIV/0!	0	3.2	400
https://pubs.acs.org/doi/10.1021/acs.energyfuels.9b03209	Gollakota	2019	chitin	1	100		100							100													44.5	6.6	42.3	6.6			18.7	0.0041			5								#DIV/0!	0	5.6	400
https://pubs.acs.org/doi/10.1021/acs.energyfuels.9b03209	Gollakota	2019	chitin	1	100		100							100													44.5	6.6	42.3	6.6			18.7	0.0041			5								#DIV/0!	0	7.9	400
https://pubs.acs.org/doi/10.1021/acs.energyfuels.9b03209	Gollakota	2019	chitin	1	100		100							100													44.5	6.6	42.3	6.6			18.7	0.0041			5								#DIV/0!	0	10	400
https://pubs.acs.org/doi/10.1021/acs.energyfuels.9b03209	Gollakota	2019	chitin	1	100		100							100													44.5	6.6	42.3	6.6			18.7	0.0041			5								#DIV/0!	0	1	450
https://pubs.acs.org/doi/10.1021/acs.energyfuels.9b03209	Gollakota	2019	chitin	1	100		100							100													44.5	6.6	42.3	6.6			18.7	0.0041			5								#DIV/0!	0	3.2	450
https://pubs.acs.org/doi/10.1021/acs.energyfuels.9b03209	Gollakota	2019	chitin	1	100		100							100													44.5	6.6	42.3	6.6			18.7	0.0041			5								#DIV/0!	0	5.6	450
https://pubs.acs.org/doi/10.1021/acs.energyfuels.9b03209	Gollakota	2019	chitin	1	100		100							100													44.5	6.6	42.3	6.6			18.7	0.0041			5								#DIV/0!	0	7.9	450
https://pubs.acs.org/doi/10.1021/acs.energyfuels.9b03209	Gollakota	2019	chitin	1	100		100							100													44.5	6.6	42.3	6.6			18.7	0.0041			5								#DIV/0!	0	10	450
https://pubs.acs.org/doi/10.1021/acs.energyfuels.9b03209	Gollakota	2019	chitin	1	100		100							100													44.5	6.6	42.3	6.6			18.7	0.0041			5								#DIV/0!	0	1	500
https://pubs.acs.org/doi/10.1021/acs.energyfuels.9b03209	Gollakota	2019	chitin	1	100		100							100													44.5	6.6	42.3	6.6			18.7	0.0041			5								#DIV/0!	0	3.2	500
https://pubs.acs.org/doi/10.1021/acs.energyfuels.9b03209	Gollakota	2019	chitin	1	100		100							100													44.5	6.6	42.3	6.6			18.7	0.0041			5								#DIV/0!	0	5.6	500
https://pubs.acs.org/doi/10.1021/acs.energyfuels.9b03209	Gollakota	2019	chitin	1	100		100							100													44.5	6.6	42.3	6.6			18.7	0.0041			5								#DIV/0!	0	7.9	500
https://pubs.acs.org/doi/10.1021/acs.energyfuels.9b03209	Gollakota	2019	chitin	1	100		100							100													44.5	6.6	42.3	6.6			18.7	0.0041			5								#DIV/0!	0	10	500
https://pubs.acs.org/doi/10.1021/acssuschemeng.7b02854	Sheehan	2017	bovine serum albumin	1						100				100																				0.0013			10	240			3.064				0.749437	0.749437	1	200
https://pubs.acs.org/doi/10.1021/acssuschemeng.7b02854	Sheehan	2017	bovine serum albumin	1						100				100																				0.0013			10	240			3.064				0.749437	0.749437	5	200
https://pubs.acs.org/doi/10.1021/acssuschemeng.7b02854	Sheehan	2017	bovine serum albumin	1						100				100																				0.0013			10	240			3.064				0.749437	0.749437	10	200
https://pubs.acs.org/doi/10.1021/acssuschemeng.7b02854	Sheehan	2017	bovine serum albumin	1						100				100																				0.0013			10	240			3.064				0.749437	0.749437	30	200
https://pubs.acs.org/doi/10.1021/acssuschemeng.7b02854	Sheehan	2017	bovine serum albumin	1						100				100																				0.0013			10	240			3.064				0.749437	0.749437	60	200
https://pubs.acs.org/doi/10.1021/acssuschemeng.7b02854	Sheehan	2017	bovine serum albumin	1						100				100																				0.0013			10	240			3.064				0.749852	0.749852	1	250
https://pubs.acs.org/doi/10.1021/acssuschemeng.7b02854	Sheehan	2017	bovine serum albumin	1						100				100																				0.0013			10	240			3.064				0.749852	0.749852	5	250
https://pubs.acs.org/doi/10.1021/acssuschemeng.7b02854	Sheehan	2017	bovine serum albumin	1						100				100																				0.0013			10	240			3.064				0.749852	0.749852	10	250
https://pubs.acs.org/doi/10.1021/acssuschemeng.7b02854	Sheehan	2017	bovine serum albumin	1						100				100																				0.0013			10	240			3.064				0.749852	0.749852	30	250
https://pubs.acs.org/doi/10.1021/acssuschemeng.7b02854	Sheehan	2017	bovine serum albumin	1						100				100																				0.0013			10	240			3.064				0.749852	0.749852	60	250
https://pubs.acs.org/doi/10.1021/acssuschemeng.7b02854	Sheehan	2017	bovine serum albumin	1						100				100																				0.0013			10	240			3.064				0.750128	0.750128	0.5	300
https://pubs.acs.org/doi/10.1021/acssuschemeng.7b02854	Sheehan	2017	bovine serum albumin	1						100				100																				0.0013			10	240			3.064				0.750128	0.750128	1	300
https://pubs.acs.org/doi/10.1021/acssuschemeng.7b02854	Sheehan	2017	bovine serum albumin	1						100				100																				0.0013			10	240			3.064				0.750128	0.750128	5	300
https://pubs.acs.org/doi/10.1021/acssuschemeng.7b02854	Sheehan	2017	bovine serum albumin	1						100				100																				0.0013			10	240			3.064				0.750128	0.750128	10	300
https://pubs.acs.org/doi/10.1021/acssuschemeng.7b02854	Sheehan	2017	bovine serum albumin	1						100				100																				0.0013			10	240			3.064				0.750128	0.750128	30	300
https://pubs.acs.org/doi/10.1021/acssuschemeng.7b02854	Sheehan	2017	bovine serum albumin	1						100				100																				0.0013			10	240			3.064				0.750128	0.750128	60	300
https://pubs.acs.org/doi/10.1021/acssuschemeng.7b02854	Sheehan	2017	bovine serum albumin	1						100				100																				0.0013			10	240			3.064				0.750325	0.750325	0.5	350
https://pubs.acs.org/doi/10.1021/acssuschemeng.7b02854	Sheehan	2017	bovine serum albumin	1						100				100																				0.0013			10	240			3.064				0.750325	0.750325	1	350
https://pubs.acs.org/doi/10.1021/acssuschemeng.7b02854	Sheehan	2017	bovine serum albumin	1						100				100																				0.0013			10	240			3.064				0.750325	0.750325	5	350
https://pubs.acs.org/doi/10.1021/acssuschemeng.7b02854	Sheehan	2017	bovine serum albumin	1						100				100																				0.0013			10	240			3.064				0.750325	0.750325	10	350
https://pubs.acs.org/doi/10.1021/acssuschemeng.7b02854	Sheehan	2017	bovine serum albumin	1						100				100																				0.0013			10	240			3.064				0.750325	0.750325	30	350
https://pubs.acs.org/doi/10.1021/acssuschemeng.7b02854	Sheehan	2017	bovine serum albumin	1						100				100																				0.0013			10	240			3.064				0.750325	0.750325	60	350
https://pubs.acs.org/doi/10.1021/acssuschemeng.7b02854	Sheehan	2017	bovine serum albumin	1						100				100																				0.0013			10	240			3.064				0.750472	0.750472	0.5	400
https://pubs.acs.org/doi/10.1021/acssuschemeng.7b02854	Sheehan	2017	bovine serum albumin	1						100				100																				0.0013			10	240			3.064				0.750472	0.750472	1	400
https://pubs.acs.org/doi/10.1021/acssuschemeng.7b02854	Sheehan	2017	bovine serum albumin	1						100				100																				0.0013			10	240			3.064				0.750472	0.750472	5	400
https://pubs.acs.org/doi/10.1021/acssuschemeng.7b02854	Sheehan	2017	bovine serum albumin	1						100				100																				0.0013			10	240			3.064				0.750472	0.750472	10	400
https://pubs.acs.org/doi/10.1021/acssuschemeng.7b02854	Sheehan	2017	bovine serum albumin	1						100				100																				0.0013			10	240			3.064				0.750472	0.750472	30	400
https://pubs.acs.org/doi/10.1021/acssuschemeng.7b02854	Sheehan	2017	bovine serum albumin	1						100				100																				0.0013			10	240			3.064				0.750472	0.750472	60	400
https://pubs.acs.org/doi/10.1021/acsestengg.0c00115	Motavaf	2021	Food Waste	1	36.5	36.5				27.5	15.7		5.4	79.7						14.6														0.0041			5								#DIV/0!	0	30	200
https://pubs.acs.org/doi/10.1021/acsestengg.0c00115	Motavaf	2021	Food Waste	1	36.5	36.5				27.5	15.7		5.4	79.7						14.6														0.0041			5								#DIV/0!	0	30	300
https://pubs.acs.org/doi/10.1021/acsestengg.0c00115	Motavaf	2021	Food Waste	1	36.5	36.5				27.5	15.7		5.4	79.7						14.6														0.0041			5								#DIV/0!	0	30	350
https://pubs.acs.org/doi/10.1021/acsestengg.0c00115	Motavaf	2021	Food Waste	1	36.5	36.5				27.5	15.7		5.4	79.7						14.6														0.0041			5								#DIV/0!	0	30	400
https://pubs.acs.org/doi/10.1021/acsestengg.0c00115	Motavaf	2021	Food Waste	1	36.5	36.5				27.5	15.7		5.4	79.7						14.6														0.0041			5								#DIV/0!	0	30	500
https://pubs.acs.org/doi/10.1021/acsestengg.0c00115	Motavaf	2021	Food Waste	1	36.5	36.5				27.5	15.7		5.4	79.7						14.6														0.0041			5								#DIV/0!	0	30	600
https://pubs.acs.org/doi/10.1021/acsestengg.0c00115	Motavaf	2021	Food Waste	1	36.5	36.5				27.5	15.7		5.4	79.7						14.6														0.0041			5								#DIV/0!	0	1	500
https://pubs.acs.org/doi/10.1021/acsestengg.0c00115	Motavaf	2021	Food Waste	1	36.5	36.5				27.5	15.7		5.4	79.7						14.6														0.0041			5								#DIV/0!	0	1	600
https://pubs.acs.org/doi/10.1021/acsestengg.0c00115	Motavaf	2021	Food Waste	1	36.5	36.5				27.5	15.7		5.4	79.7						14.6														0.0041			5								#DIV/0!	0	0	300
https://pubs.acs.org/doi/10.1021/acsestengg.0c00115	Motavaf	2021	Food Waste	1	36.5	36.5				27.5	15.7		5.4	79.7						14.6														0.0041			5								#DIV/0!	0	30	300
https://pubs.acs.org/doi/10.1021/acsestengg.0c00115	Motavaf	2021	Food Waste	1	36.5	36.5				27.5	15.7		5.4	79.7						14.6														0.0041			5								#DIV/0!	0	30	300
https://pubs.acs.org/doi/10.1021/acsestengg.0c00115	Motavaf	2021	Food Waste	1	36.5	36.5				27.5	15.7		5.4	79.7						14.6														0.0041			5								#DIV/0!	0	30	300
https://pubs.acs.org/doi/10.1021/acsestengg.0c00115	Motavaf	2021	Food Waste	1	36.5	36.5				27.5	15.7		5.4	79.7						14.6														0.0041			5								#DIV/0!	0	30	300
https://www.sciencedirect.com/science/article/pii/S0360544220306575	He	2020	Lignin	1								100		100													60.7	6.6	32.94	0			23.1	0.05			10	10			0.145			38	15.851	15.851	53.851	300
https://www.sciencedirect.com/science/article/pii/S0360544220306575	He	2020	Lignin	1								100		100													60.7	6.6	32.94	0			23.1	0.05			10	10			0.145			60	15.851	15.851	75.851	300
https://www.sciencedirect.com/science/article/pii/S0360544220306575	He	2020	Lignin	1								100		100													60.7	6.6	32.94	0			23.1	0.05			10	10			0.145			20	15.851	15.851	35.851	300
https://www.sciencedirect.com/science/article/pii/S0360544220306575	He	2020	Lignin	1								100		100													60.7	6.6	32.94	0			23.1	0.05			10	10			0.145			33	15.8558	15.8558	48.8558	360
https://www.sciencedirect.com/science/article/pii/S0360544220306575	He	2020	Lignin	1								100		100													60.7	6.6	32.94	0			23.1	0.05			10	10			0.145			60	15.8558	15.8558	75.8558	360
https://www.sciencedirect.com/science/article/pii/S0360544220306575	He	2020	Lignin	1								100		100													60.7	6.6	32.94	0			23.1	0.05			10	10			0.145			42.6	15.8533	15.8533	58.4533	325.4
https://www.sciencedirect.com/science/article/pii/S0360544220306575	He	2020	Lignin	1								100		100													60.7	6.6	32.94	0			23.1	0.05			10	10			0.145			42.6	15.8533	15.8533	58.4533	325.4
https://www.sciencedirect.com/science/article/pii/S0360544220306575	He	2020	Lignin	1								100		100													60.7	6.6	32.94	0			23.1	0.05			10	10			0.145			42.6	15.8533	15.8533	58.4533	325.4
https://www.sciencedirect.com/science/article/pii/S0360544220306575	He	2020	Lignin	1								100		100													60.7	6.6	32.94	0			23.1	0.05			10	10			0.145			45.4	15.8558	15.8558	61.2558	360
https://www.sciencedirect.com/science/article/pii/S0360544220306575	He	2020	Lignin	1								100		100													60.7	6.6	32.94	0			23.1	0.05			10	10			0.145			38.8	15.8547	15.8547	54.6547	343.8
https://www.sciencedirect.com/science/article/pii/S0360544220306575	He	2020	Lignin	1								100		100													60.7	6.6	32.94	0			23.1	0.05			10	10			0.145			25.85	15.8529	15.8529	41.7029	321.63
https://www.sciencedirect.com/science/article/pii/S0360544220306575	He	2020	Lignin	1								100		100													60.7	6.6	32.94	0			23.1	0.05			10	10			0.145			20	15.8547	15.8547	35.8547	343.5
https://www.sciencedirect.com/science/article/pii/S0360544220306575	He	2020	Lignin	1								100		100													60.7	6.6	32.94	0			23.1	0.05			10	10			0.145			20	15.8547	15.8547	35.8547	343.5
https://www.sciencedirect.com/science/article/pii/S0360544220306575	He	2020	Lignin	1								100		100													60.7	6.6	32.94	0			23.1	0.05			10	10			0.145			60	15.8539	15.8539	75.8539	333
https://www.sciencedirect.com/science/article/pii/S0360544220306575	He	2020	Lignin	1								100		100													60.7	6.6	32.94	0			23.1	0.05			10	10			0.145			60	15.8539	15.8539	75.8539	333
https://www.sciencedirect.com/science/article/pii/S0360544220306575	He	2020	Spirulina platensis-Lignin 1.25:1	0	12.2376	12.2376				35.9959	2.96979	44.4444	4.72222	95.6477													53.0333	6.76667	34.3622	5.94444	0		20.5444	0.05			10	10			0.145			40	15.8544	15.8544	55.8544	340
https://www.sciencedirect.com/science/article/pii/S0360544220306575	He	2020	Spirulina platensis-Lignin 1.25:1	0	12.2376	12.2376				35.9959	2.96979	44.4444	4.72222	95.6477													53.0333	6.76667	34.3622	5.94444	0		20.5444	0.05			10	10			0.145			20	15.8558	15.8558	35.8558	360
https://www.sciencedirect.com/science/article/pii/S0360544220306575	He	2020	Spirulina platensis-Lignin 1.25:1	0	12.2376	12.2376				35.9959	2.96979	44.4444	4.72222	95.6477													53.0333	6.76667	34.3622	5.94444	0		20.5444	0.05			10	10			0.145			60	15.8558	15.8558	75.8558	360
https://www.sciencedirect.com/science/article/pii/S0360544220306575	He	2020	Spirulina platensis-Lignin 1.25:1	0	12.2376	12.2376				35.9959	2.96979	44.4444	4.72222	95.6477													53.0333	6.76667	34.3622	5.94444	0		20.5444	0.05			10	10			0.145			40	15.8544	15.8544	55.8544	340
https://www.sciencedirect.com/science/article/pii/S0360544220306575	He	2020	Spirulina platensis-Lignin 2:1	0	14.6851	14.6851				43.1951	3.56375	50	5.66667	111.444													51.5	6.8	34.6467	7.13333	0		20.0333	0.05			10	10			0.145			20	15.8544	15.8544	35.8544	340
https://www.sciencedirect.com/science/article/pii/S0360544220306575	He	2020	Spirulina platensis-Lignin 0.5:1	0	7.34255	7.34255				21.5975	1.78187	66.6667	2.83333	97.3886													56.1	6.7	33.7933	3.56667	0		21.5667	0.05			10	10			0.145			60	15.8544	15.8544	75.8544	340
https://www.sciencedirect.com/science/article/pii/S0360544220306575	He	2020	Spirulina platensis-Lignin 1.25:1	0	12.2376	12.2376				35.9959	2.96979	44.4444	4.72222	95.6477													53.0333	6.76667	34.3622	5.94444	0		20.5444	0.05			10	10			0.145			40	15.8544	15.8544	55.8544	340
https://www.sciencedirect.com/science/article/pii/S0360544220306575	He	2020	Spirulina platensis-Lignin 2:1	0	14.6851	14.6851				43.1951	3.56375	50	5.66667	111.444													51.5	6.8	34.6467	7.13333	0		20.0333	0.05			10	10			0.145			60	15.8544	15.8544	75.8544	340
https://www.sciencedirect.com/science/article/pii/S0360544220306575	He	2020	Spirulina platensis-Lignin 2:1	0	14.6851	14.6851				43.1951	3.56375	50	5.66667	111.444													51.5	6.8	34.6467	7.13333	0		20.0333	0.05			10	10			0.145			40	15.8528	15.8528	55.8528	320
https://www.sciencedirect.com/science/article/pii/S0360544220306575	He	2020	Spirulina platensis-Lignin 1.25:1	0	12.2376	12.2376				35.9959	2.96979	44.4444	4.72222	95.6477													53.0333	6.76667	34.3622	5.94444	0		20.5444	0.05			10	10			0.145			40	15.8544	15.8544	55.8544	340
https://www.sciencedirect.com/science/article/pii/S0360544220306575	He	2020	Spirulina platensis-Lignin 1.25:1	0	12.2376	12.2376				35.9959	2.96979	44.4444	4.72222	95.6477													53.0333	6.76667	34.3622	5.94444	0		20.5444	0.05			10	10			0.145			60	15.8528	15.8528	75.8528	320
https://www.sciencedirect.com/science/article/pii/S0360544220306575	He	2020	Spirulina platensis-Lignin 0.5:1	0	7.34255	7.34255				21.5975	1.78187	66.6667	2.83333	97.3886													56.1	6.7	33.7933	3.56667	0		21.5667	0.05			10	10			0.145			40	15.8558	15.8558	55.8558	360
https://www.sciencedirect.com/science/article/pii/S0360544220306575	He	2020	Spirulina platensis-Lignin 1.25:1	0	12.2376	12.2376				35.9959	2.96979	44.4444	4.72222	95.6477													53.0333	6.76667	34.3622	5.94444	0		20.5444	0.05			10	10			0.145			20	15.8528	15.8528	35.8528	320
https://www.sciencedirect.com/science/article/pii/S0360544220306575	He	2020	Spirulina platensis-Lignin 1.25:1	0	12.2376	12.2376				35.9959	2.96979	44.4444	4.72222	95.6477													53.0333	6.76667	34.3622	5.94444	0		20.5444	0.05			10	10			0.145			40	15.8544	15.8544	55.8544	340
https://www.sciencedirect.com/science/article/pii/S0360544220306575	He	2020	Spirulina platensis-Lignin 0.5:1	0	7.34255	7.34255				21.5975	1.78187	66.6667	2.83333	97.3886													56.1	6.7	33.7933	3.56667	0		21.5667	0.05			10	10			0.145			20	15.8544	15.8544	35.8544	340
https://www.sciencedirect.com/science/article/pii/S0360544220306575	He	2020	Spirulina platensis-Lignin 2:1	0	14.6851	14.6851				43.1951	3.56375	50	5.66667	111.444													51.5	6.8	34.6467	7.13333	0		20.0333	0.05			10	10			0.145			40	15.8558	15.8558	55.8558	360
https://www.sciencedirect.com/science/article/pii/S0360544220306575	He	2020	Spirulina platensis-Lignin 0.5:1	0	7.34255	7.34255				21.5975	1.78187	66.6667	2.83333	97.3886													56.1	6.7	33.7933	3.56667	0		21.5667	0.05			10	10			0.145			40	15.8528	15.8528	55.8528	320
https://www.sciencedirect.com/science/article/pii/S0360544220306575	He	2020	Spirulina platensis-Lignin 2:1	0	14.6851	14.6851				43.1951	3.56375	50	5.66667	111.444													51.5	6.8	34.6467	7.13333	0		20.0333	0.05			10	10			0.145			40	15.8544	15.8544	55.8544	340
https://www.sciencedirect.com/science/article/pii/S0360544220306575	He	2020	Spirulina platensis-Lignin 2:1	0	14.6851	14.6851				43.1951	3.56375	50	5.66667	111.444													51.5	6.8	34.6467	7.13333	0		20.0333	0.05			10	10			0.145			40	15.8544	15.8544	55.8544	340
https://www.sciencedirect.com/science/article/pii/S0360544220306575	He	2020	Spirulina platensis-Lignin 2:1	0	14.6851	14.6851				43.1951	3.56375	50	5.66667	111.444													51.5	6.8	34.6467	7.13333	0		20.0333	0.05			10	10			0.145			40	15.8544	15.8544	55.8544	340
https://www.sciencedirect.com/science/article/pii/S0956053X19305412	Leon	2019	Grinded real waste	1									4.3				49.8										39.3	8.5	44.8	3.1			14.2		94		50						16.9	15	#DIV/0!	0	15	290
https://www.sciencedirect.com/science/article/pii/S0956053X19305412	Leon	2019	Grinded real waste	1									4.3				49.8										39.3	8.5	44.8	3.1			14.2		95		50						12	15	#DIV/0!	0	15	290
https://www.sciencedirect.com/science/article/pii/S0956053X19305412	Leon	2019	Grinded real waste	1									4.3				49.8										39.3	8.5	44.8	3.1			14.2		95		50						15	5	#DIV/0!	0	5	290
https://www.sciencedirect.com/science/article/pii/S0956053X19305412	Leon	2019	Grinded real waste	1									4.3				49.8										39.3	8.5	44.8	3.1			14.2		80		50						12.1	5	#DIV/0!	0	5	290
https://www.sciencedirect.com/science/article/pii/S0956053X19305412	Leon	2019	Grinded real waste	1									4.3				49.8										39.3	8.5	44.8	3.1			14.2		80		50						11	5	#DIV/0!	0	5	290
https://www.sciencedirect.com/science/article/pii/S0956053X19305412	Leon	2019	Grinded real waste	1									4.3				49.8										39.3	8.5	44.8	3.1			14.2		80		20						11.2	5	#DIV/0!	0	5	290
https://www.sciencedirect.com/science/article/pii/S0956053X19305413	Leon	2019	Butcher waste 1	1									4.8				26.7										41.9	9.3	41.3	2.7			15.7		80		20						7.3	5	#DIV/0!	0	5	250
https://www.sciencedirect.com/science/article/pii/S0956053X19305411	Leon	2019	PAP + Fat	1																															80		50						13.2	5	#DIV/0!	0	5	290
https://www.sciencedirect.com/science/article/pii/S1385894720303880	Obeid	2020	oleic acid	1							100			100			0					0	100	0										0.011			30	125			1.616				1.42175	1.42175	5	250
https://www.sciencedirect.com/science/article/pii/S1385894720303880	Obeid	2020	oleic acid	1							100			100			0					0	100	0										0.011			30	125			1.616				1.42175	1.42175	10	250
https://www.sciencedirect.com/science/article/pii/S1385894720303880	Obeid	2020	oleic acid	1							100			100			0					0	100	0										0.011			30	125			1.616				1.42175	1.42175	20	250
https://www.sciencedirect.com/science/article/pii/S1385894720303880	Obeid	2020	oleic acid	1							100			100			0					0	100	0										0.011			30	125			1.616				1.42175	1.42175	30	250
https://www.sciencedirect.com/science/article/pii/S1385894720303880	Obeid	2020	oleic acid	1							100			100			0					0	100	0										0.011			30	125			1.616				1.42175	1.42175	60	250
https://www.sciencedirect.com/science/article/pii/S1385894720303880	Obeid	2020	oleic acid	1							100			100			0					0	100	0										0.011			30	125			1.616				1.42227	1.42227	5	300
https://www.sciencedirect.com/science/article/pii/S1385894720303880	Obeid	2020	oleic acid	1							100			100			0					0	100	0										0.011			30	125			1.616				1.42227	1.42227	10	300
https://www.sciencedirect.com/science/article/pii/S1385894720303880	Obeid	2020	oleic acid	1							100			100			0					0	100	0										0.011			30	125			1.616				1.42227	1.42227	20	300
https://www.sciencedirect.com/science/article/pii/S1385894720303880	Obeid	2020	oleic acid	1							100			100			0					0	100	0										0.011			30	125			1.616				1.42227	1.42227	30	300
https://www.sciencedirect.com/science/article/pii/S1385894720303880	Obeid	2020	oleic acid	1							100			100			0					0	100	0										0.011			30	125			1.616				1.42227	1.42227	60	300
https://www.sciencedirect.com/science/article/pii/S1385894720303880	Obeid	2020	oleic acid	1							100			100			0					0	100	0										0.011			30	125			1.616				1.42265	1.42265	5	350
https://www.sciencedirect.com/science/article/pii/S1385894720303880	Obeid	2020	oleic acid	1							100			100			0					0	100	0										0.011			30	125			1.616				1.42265	1.42265	10	350
https://www.sciencedirect.com/science/article/pii/S1385894720303880	Obeid	2020	oleic acid	1							100			100			0					0	100	0										0.011			30	125			1.616				1.42265	1.42265	20	350
https://www.sciencedirect.com/science/article/pii/S1385894720303880	Obeid	2020	oleic acid	1							100			100			0					0	100	0										0.011			30	125			1.616				1.42265	1.42265	30	350
https://www.sciencedirect.com/science/article/pii/S1385894720303880	Obeid	2020	oleic acid	1							100			100			0					0	100	0										0.011			30	125			1.616				1.42265	1.42265	60	350
https://www.sciencedirect.com/science/article/pii/S1385894720303880	Obeid	2020	glucose	1	100	100								100			0					45.1299	7.14286	48.2684										0.011			30	125			1.616				1.42175	1.42175	5	250
https://www.sciencedirect.com/science/article/pii/S1385894720303880	Obeid	2020	glucose	1	100	100								100			0					45.1299	7.14286	48.2684										0.011			30	125			1.616				1.42175	1.42175	10	250
https://www.sciencedirect.com/science/article/pii/S1385894720303880	Obeid	2020	glucose	1	100	100								100			0					45.1299	7.14286	48.2684										0.011			30	125			1.616				1.42175	1.42175	20	250
https://www.sciencedirect.com/science/article/pii/S1385894720303880	Obeid	2020	glucose	1	100	100								100			0					45.1299	7.14286	48.2684										0.011			30	125			1.616				1.42175	1.42175	30	250
https://www.sciencedirect.com/science/article/pii/S1385894720303880	Obeid	2020	glucose	1	100	100								100			0					45.1299	7.14286	48.2684										0.011			30	125			1.616				1.42175	1.42175	60	250
https://www.sciencedirect.com/science/article/pii/S1385894720303880	Obeid	2020	glucose	1	100	100								100			0					45.1299	7.14286	48.2684										0.011			30	125			1.616				1.42227	1.42227	5	300
https://www.sciencedirect.com/science/article/pii/S1385894720303880	Obeid	2020	glucose	1	100	100								100			0					45.1299	7.14286	48.2684										0.011			30	125			1.616				1.42227	1.42227	10	300
https://www.sciencedirect.com/science/article/pii/S1385894720303880	Obeid	2020	glucose	1	100	100								100			0					45.1299	7.14286	48.2684										0.011			30	125			1.616				1.42227	1.42227	20	300
https://www.sciencedirect.com/science/article/pii/S1385894720303880	Obeid	2020	glucose	1	100	100								100			0					45.1299	7.14286	48.2684										0.011			30	125			1.616				1.42227	1.42227	30	300
https://www.sciencedirect.com/science/article/pii/S1385894720303880	Obeid	2020	glucose	1	100	100								100			0					45.1299	7.14286	48.2684										0.011			30	125			1.616				1.42227	1.42227	60	300
https://www.sciencedirect.com/science/article/pii/S1385894720303880	Obeid	2020	glucose	1	100	100								100			0					45.1299	7.14286	48.2684										0.011			30	125			1.616				1.42265	1.42265	5	350
https://www.sciencedirect.com/science/article/pii/S1385894720303880	Obeid	2020	glucose	1	100	100								100			0					45.1299	7.14286	48.2684										0.011			30	125			1.616				1.42265	1.42265	10	350
https://www.sciencedirect.com/science/article/pii/S1385894720303880	Obeid	2020	glucose	1	100	100								100			0					45.1299	7.14286	48.2684										0.011			30	125			1.616				1.42265	1.42265	20	350
https://www.sciencedirect.com/science/article/pii/S1385894720303880	Obeid	2020	glucose	1	100	100								100			0					45.1299	7.14286	48.2684										0.011			30	125			1.616				1.42265	1.42265	30	350
https://www.sciencedirect.com/science/article/pii/S1385894720303880	Obeid	2020	glucose	1	100	100								100			0					45.1299	7.14286	48.2684										0.011			30	125			1.616				1.42265	1.42265	60	350
https://www.sciencedirect.com/science/article/pii/S1385894720303880	Obeid	2020	alanine	1						100				100			0					63.0769	0	37.033										0.011			30	125			1.616				1.42175	1.42175	5	250
https://www.sciencedirect.com/science/article/pii/S1385894720303880	Obeid	2020	alanine	1						100				100			0					63.0769	0	37.033										0.011			30	125			1.616				1.42175	1.42175	10	250
https://www.sciencedirect.com/science/article/pii/S1385894720303880	Obeid	2020	alanine	1						100				100			0					63.0769	0	37.033										0.011			30	125			1.616				1.42175	1.42175	20	250
https://www.sciencedirect.com/science/article/pii/S1385894720303880	Obeid	2020	alanine	1						100				100			0					63.0769	0	37.033										0.011			30	125			1.616				1.42175	1.42175	30	250
https://www.sciencedirect.com/science/article/pii/S1385894720303880	Obeid	2020	alanine	1						100				100			0					63.0769	0	37.033										0.011			30	125			1.616				1.42175	1.42175	60	250
https://www.sciencedirect.com/science/article/pii/S1385894720303880	Obeid	2020	alanine	1						100				100			0					63.0769	0	37.033										0.011			30	125			1.616				1.42227	1.42227	5	300
https://www.sciencedirect.com/science/article/pii/S1385894720303880	Obeid	2020	alanine	1						100				100			0					63.0769	0	37.033										0.011			30	125			1.616				1.42227	1.42227	10	300
https://www.sciencedirect.com/science/article/pii/S1385894720303880	Obeid	2020	alanine	1						100				100			0					63.0769	0	37.033										0.011			30	125			1.616				1.42227	1.42227	20	300
https://www.sciencedirect.com/science/article/pii/S1385894720303880	Obeid	2020	alanine	1						100				100			0					63.0769	0	37.033										0.011			30	125			1.616				1.42227	1.42227	30	300
https://www.sciencedirect.com/science/article/pii/S1385894720303880	Obeid	2020	alanine	1						100				100			0					63.0769	0	37.033										0.011			30	125			1.616				1.42227	1.42227	60	300
https://www.sciencedirect.com/science/article/pii/S1385894720303880	Obeid	2020	alanine	1						100				100			0					63.0769	0	37.033										0.011			30	125			1.616				1.42265	1.42265	5	350
https://www.sciencedirect.com/science/article/pii/S1385894720303880	Obeid	2020	alanine	1						100				100			0					63.0769	0	37.033										0.011			30	125			1.616				1.42265	1.42265	10	350
https://www.sciencedirect.com/science/article/pii/S1385894720303880	Obeid	2020	alanine	1						100				100			0					63.0769	0	37.033										0.011			30	125			1.616				1.42265	1.42265	20	350
https://www.sciencedirect.com/science/article/pii/S1385894720303880	Obeid	2020	alanine	1						100				100			0					63.0769	0	37.033										0.011			30	125			1.616				1.42265	1.42265	30	350
https://www.sciencedirect.com/science/article/pii/S1385894720303880	Obeid	2020	alanine	1						100				100			0					63.0769	0	37.033										0.011			30	125			1.616				1.42265	1.42265	60	350
https://www.sciencedirect.com/science/article/pii/S1385894720303880	Obeid	2020	guaiacol	1								100		100			0					0	62.963	36.8126										0.011			30	125			1.616				1.42175	1.42175	5	250
https://www.sciencedirect.com/science/article/pii/S1385894720303880	Obeid	2020	guaiacol	1								100		100			0					0	62.963	36.8126										0.011			30	125			1.616				1.42175	1.42175	10	250
https://www.sciencedirect.com/science/article/pii/S1385894720303880	Obeid	2020	guaiacol	1								100		100			0					0	62.963	36.8126										0.011			30	125			1.616				1.42175	1.42175	20	250
https://www.sciencedirect.com/science/article/pii/S1385894720303880	Obeid	2020	guaiacol	1								100		100			0					0	62.963	36.8126										0.011			30	125			1.616				1.42175	1.42175	30	250
https://www.sciencedirect.com/science/article/pii/S1385894720303880	Obeid	2020	guaiacol	1								100		100			0					0	62.963	36.8126										0.011			30	125			1.616				1.42175	1.42175	60	250
https://www.sciencedirect.com/science/article/pii/S1385894720303880	Obeid	2020	guaiacol	1								100		100			0					0	62.963	36.8126										0.011			30	125			1.616				1.42227	1.42227	5	300
https://www.sciencedirect.com/science/article/pii/S1385894720303880	Obeid	2020	guaiacol	1								100		100			0					0	62.963	36.8126										0.011			30	125			1.616				1.42227	1.42227	10	300
https://www.sciencedirect.com/science/article/pii/S1385894720303880	Obeid	2020	guaiacol	1								100		100			0					0	62.963	36.8126										0.011			30	125			1.616				1.42227	1.42227	20	300
https://www.sciencedirect.com/science/article/pii/S1385894720303880	Obeid	2020	guaiacol	1								100		100			0					0	62.963	36.8126										0.011			30	125			1.616				1.42227	1.42227	30	300
https://www.sciencedirect.com/science/article/pii/S1385894720303880	Obeid	2020	guaiacol	1								100		100			0					0	62.963	36.8126										0.011			30	125			1.616				1.42227	1.42227	60	300
https://www.sciencedirect.com/science/article/pii/S1385894720303880	Obeid	2020	guaiacol	1								100		100			0					0	62.963	36.8126										0.011			30	125			1.616				1.42265	1.42265	5	350
https://www.sciencedirect.com/science/article/pii/S1385894720303880	Obeid	2020	guaiacol	1								100		100			0					0	62.963	36.8126										0.011			30	125			1.616				1.42265	1.42265	10	350
https://www.sciencedirect.com/science/article/pii/S1385894720303880	Obeid	2020	guaiacol	1								100		100			0					0	62.963	36.8126										0.011			30	125			1.616				1.42265	1.42265	20	350
https://www.sciencedirect.com/science/article/pii/S1385894720303880	Obeid	2020	guaiacol	1								100		100			0					0	62.963	36.8126										0.011			30	125			1.616				1.42265	1.42265	30	350
https://www.sciencedirect.com/science/article/pii/S1385894720303880	Obeid	2020	guaiacol	1								100		100			0					0	62.963	36.8126										0.011			30	125			1.616				1.42265	1.42265	60	350
https://www.sciencedirect.com/science/article/pii/S0306261918315903#b0040	Yang	2019	Mix	1						100				100																				0.1			12	10			0.145			5	15.8477	15.8477	20.8477	270
https://www.sciencedirect.com/science/article/pii/S0306261918315903#b0040	Yang	2019	Mix	1	100	100								100																				0.1			12	10			0.145			5	15.8477	15.8477	20.8477	270
https://www.sciencedirect.com/science/article/pii/S0306261918315903#b0040	Yang	2019	Mix	1								100		100																				0.1			12	10			0.145			5	15.8477	15.8477	20.8477	270
https://www.sciencedirect.com/science/article/pii/S0306261918315903#b0040	Yang	2019	Mix	1							100			100																				0.1			12	10			0.145			5	15.8477	15.8477	20.8477	270
https://www.sciencedirect.com/science/article/pii/S0306261918315903#b0040	Yang	2019	Mix	1	50	50				50				100																				0.1			12	10			0.145			5	15.8477	15.8477	20.8477	270
https://www.sciencedirect.com/science/article/pii/S0306261918315903#b0040	Yang	2019	Mix	1						50		50		100																				0.1			12	10			0.145			5	15.8477	15.8477	20.8477	270
https://www.sciencedirect.com/science/article/pii/S0306261918315903#b0040	Yang	2019	Mix	1						50	50			100																				0.1			12	10			0.145			5	15.8477	15.8477	20.8477	270
https://www.sciencedirect.com/science/article/pii/S0306261918315903#b0040	Yang	2019	Mix	1	50	50						50		100																				0.1			12	10			0.145			5	15.8477	15.8477	20.8477	270
https://www.sciencedirect.com/science/article/pii/S0306261918315903#b0040	Yang	2019	Mix	1	50	50					50			100																				0.1			12	10			0.145			5	15.8477	15.8477	20.8477	270
https://www.sciencedirect.com/science/article/pii/S0306261918315903#b0040	Yang	2019	Mix	1							50	50		100																				0.1			12	10			0.145			5	15.8477	15.8477	20.8477	270
https://www.sciencedirect.com/science/article/pii/S0306261918315903#b0040	Yang	2019	Mix	1	33	33				33		33		99																				0.1			12	10			0.145			5	15.8477	15.8477	20.8477	270
https://www.sciencedirect.com/science/article/pii/S0306261918315903#b0040	Yang	2019	Mix	1	33	33				33	33			99																				0.1			12	10			0.145			5	15.8477	15.8477	20.8477	270
https://www.sciencedirect.com/science/article/pii/S0306261918315903#b0040	Yang	2019	Mix	1						33	33	33		99																				0.1			12	10			0.145			5	15.8477	15.8477	20.8477	270
https://www.sciencedirect.com/science/article/pii/S0306261918315903#b0040	Yang	2019	Mix	1	33	33					33	33		99																				0.1			12	10			0.145			5	15.8477	15.8477	20.8477	270
https://www.sciencedirect.com/science/article/pii/S0306261918315903#b0040	Yang	2019	Mix	1	25	25				25	25	25		100																				0.1			12	10			0.145			5	15.8477	15.8477	20.8477	270
https://www.sciencedirect.com/science/article/pii/S0306261918315903#b0040	Yang	2019	Mix	1	13	13				63	13	13		102																				0.1			12	10			0.145			5	15.8477	15.8477	20.8477	270
https://www.sciencedirect.com/science/article/pii/S0306261918315903#b0040	Yang	2019	Mix	1	63	63				13	13	13		102																				0.1			12	10			0.145			5	15.8477	15.8477	20.8477	270
https://www.sciencedirect.com/science/article/pii/S0306261918315903#b0040	Yang	2019	Mix	1	13	13				13	13	63		102																				0.1			12	10			0.145			5	15.8477	15.8477	20.8477	270
https://www.sciencedirect.com/science/article/pii/S0306261918315903#b0040	Yang	2019	Mix	1	13	13				13	63	13		102																				0.1			12	10			0.145			5	15.8477	15.8477	20.8477	270
https://www.sciencedirect.com/science/article/pii/S0306261918315903#b0040	Yang	2019	Mix	1	25	25				25	25	25		100																				0.1			12	10			0.145			5	15.8477	15.8477	20.8477	270
https://www.sciencedirect.com/science/article/pii/S0306261918315903#b0040	Yang	2019	Mix	1						100				100																				0.1			6	10			0.145			5	15.8528	15.8528	20.8528	320
https://www.sciencedirect.com/science/article/pii/S0306261918315903#b0040	Yang	2019	Mix	1	100	100								100																				0.1			6	10			0.145			5	15.8528	15.8528	20.8528	320
https://www.sciencedirect.com/science/article/pii/S0306261918315903#b0040	Yang	2019	Mix	1								100		100																				0.1			6	10			0.145			5	15.8528	15.8528	20.8528	320
https://www.sciencedirect.com/science/article/pii/S0306261918315903#b0040	Yang	2019	Mix	1							100			100																				0.1			6	10			0.145			5	15.8528	15.8528	20.8528	320
https://www.sciencedirect.com/science/article/pii/S0306261918315903#b0040	Yang	2019	Mix	1	50	50				50				100																				0.1			6	10			0.145			5	15.8528	15.8528	20.8528	320
https://www.sciencedirect.com/science/article/pii/S0306261918315903#b0040	Yang	2019	Mix	1						50		50		100																				0.1			6	10			0.145			5	15.8528	15.8528	20.8528	320
https://www.sciencedirect.com/science/article/pii/S0306261918315903#b0040	Yang	2019	Mix	1						50	50			100																				0.1			6	10			0.145			5	15.8528	15.8528	20.8528	320
https://www.sciencedirect.com/science/article/pii/S0306261918315903#b0040	Yang	2019	Mix	1	50	50						50		100																				0.1			6	10			0.145			5	15.8528	15.8528	20.8528	320
https://www.sciencedirect.com/science/article/pii/S0306261918315903#b0040	Yang	2019	Mix	1	50	50					50			100																				0.1			6	10			0.145			5	15.8528	15.8528	20.8528	320
https://www.sciencedirect.com/science/article/pii/S0306261918315903#b0040	Yang	2019	Mix	1							50	50		100																				0.1			6	10			0.145			5	15.8528	15.8528	20.8528	320
https://www.sciencedirect.com/science/article/pii/S0306261918315903#b0040	Yang	2019	Mix	1	33	33				33		33		99																				0.1			6	10			0.145			5	15.8528	15.8528	20.8528	320
https://www.sciencedirect.com/science/article/pii/S0306261918315903#b0040	Yang	2019	Mix	1	33	33				33	33			99																				0.1			6	10			0.145			5	15.8528	15.8528	20.8528	320
https://www.sciencedirect.com/science/article/pii/S0306261918315903#b0040	Yang	2019	Mix	1						33	33	33		99																				0.1			6	10			0.145			5	15.8528	15.8528	20.8528	320
https://www.sciencedirect.com/science/article/pii/S0306261918315903#b0040	Yang	2019	Mix	1	33	33					33	33		99																				0.1			6	10			0.145			5	15.8528	15.8528	20.8528	320
https://www.sciencedirect.com/science/article/pii/S0306261918315903#b0040	Yang	2019	Mix	1	25	25				25	25	25		100																				0.1			6	10			0.145			5	15.8528	15.8528	20.8528	320
https://www.sciencedirect.com/science/article/pii/S0306261918315903#b0040	Yang	2019	Mix	1	13	13				63	13	13		102																				0.1			6	10			0.145			5	15.8528	15.8528	20.8528	320
https://www.sciencedirect.com/science/article/pii/S0306261918315903#b0040	Yang	2019	Mix	1	63	63				13	13	13		102																				0.1			6	10			0.145			5	15.8528	15.8528	20.8528	320
https://www.sciencedirect.com/science/article/pii/S0306261918315903#b0040	Yang	2019	Mix	1	13	13				13	13	63		102																				0.1			6	10			0.145			5	15.8528	15.8528	20.8528	320
https://www.sciencedirect.com/science/article/pii/S0306261918315903#b0040	Yang	2019	Mix	1	13	13				13	63	13		102																				0.1			6	10			0.145			5	15.8528	15.8528	20.8528	320
https://www.sciencedirect.com/science/article/pii/S0306261918315903#b0040	Yang	2019	Mix	1	25	25				25	25	25		100																				0.1			6	10			0.145			5	15.8528	15.8528	20.8528	320
https://www.sciencedirect.com/science/article/pii/S0306261918315903#b0040	Yang	2019	Mix	1						100				100																				0.1			6	10			0.145			20	15.8477	15.8477	35.8477	270
https://www.sciencedirect.com/science/article/pii/S0306261918315903#b0040	Yang	2019	Mix	1	100	100								100																				0.1			6	10			0.145			20	15.8477	15.8477	35.8477	270
https://www.sciencedirect.com/science/article/pii/S0306261918315903#b0040	Yang	2019	Mix	1								100		100																				0.1			6	10			0.145			20	15.8477	15.8477	35.8477	270
https://www.sciencedirect.com/science/article/pii/S0306261918315903#b0040	Yang	2019	Mix	1							100			100																				0.1			6	10			0.145			20	15.8477	15.8477	35.8477	270
https://www.sciencedirect.com/science/article/pii/S0306261918315903#b0040	Yang	2019	Mix	1	50	50				50				100																				0.1			6	10			0.145			20	15.8477	15.8477	35.8477	270
https://www.sciencedirect.com/science/article/pii/S0306261918315903#b0040	Yang	2019	Mix	1						50		50		100																				0.1			6	10			0.145			20	15.8477	15.8477	35.8477	270
https://www.sciencedirect.com/science/article/pii/S0306261918315903#b0040	Yang	2019	Mix	1						50	50			100																				0.1			6	10			0.145			20	15.8477	15.8477	35.8477	270
https://www.sciencedirect.com/science/article/pii/S0306261918315903#b0040	Yang	2019	Mix	1	50	50						50		100																				0.1			6	10			0.145			20	15.8477	15.8477	35.8477	270
https://www.sciencedirect.com/science/article/pii/S0306261918315903#b0040	Yang	2019	Mix	1	50	50					50			100																				0.1			6	10			0.145			20	15.8477	15.8477	35.8477	270
https://www.sciencedirect.com/science/article/pii/S0306261918315903#b0040	Yang	2019	Mix	1							50	50		100																				0.1			6	10			0.145			20	15.8477	15.8477	35.8477	270
https://www.sciencedirect.com/science/article/pii/S0306261918315903#b0040	Yang	2019	Mix	1	33	33				33		33		99																				0.1			6	10			0.145			20	15.8477	15.8477	35.8477	270
https://www.sciencedirect.com/science/article/pii/S0306261918315903#b0040	Yang	2019	Mix	1	33	33				33	33			99																				0.1			6	10			0.145			20	15.8477	15.8477	35.8477	270
https://www.sciencedirect.com/science/article/pii/S0306261918315903#b0040	Yang	2019	Mix	1						33	33	33		99																				0.1			6	10			0.145			20	15.8477	15.8477	35.8477	270
https://www.sciencedirect.com/science/article/pii/S0306261918315903#b0040	Yang	2019	Mix	1	33	33					33	33		99																				0.1			6	10			0.145			20	15.8477	15.8477	35.8477	270
https://www.sciencedirect.com/science/article/pii/S0306261918315903#b0040	Yang	2019	Mix	1	25	25				25	25	25		100																				0.1			6	10			0.145			20	15.8477	15.8477	35.8477	270
https://www.sciencedirect.com/science/article/pii/S0306261918315903#b0040	Yang	2019	Mix	1	13	13				63	13	13		102																				0.1			6	10			0.145			20	15.8477	15.8477	35.8477	270
https://www.sciencedirect.com/science/article/pii/S0306261918315903#b0040	Yang	2019	Mix	1	63	63				13	13	13		102																				0.1			6	10			0.145			20	15.8477	15.8477	35.8477	270
https://www.sciencedirect.com/science/article/pii/S0306261918315903#b0040	Yang	2019	Mix	1	13	13				13	13	63		102																				0.1			6	10			0.145			20	15.8477	15.8477	35.8477	270
https://www.sciencedirect.com/science/article/pii/S0306261918315903#b0040	Yang	2019	Mix	1	13	13				13	63	13		102																				0.1			6	10			0.145			20	15.8477	15.8477	35.8477	270
https://www.sciencedirect.com/science/article/pii/S0306261918315903#b0040	Yang	2019	Mix	1	25	25				25	25	25		100																				0.1			6	10			0.145			20	15.8477	15.8477	35.8477	270
https://www.sciencedirect.com/science/article/pii/S0306261918315903#b0040	Yang	2019	Mix	1						100				100																				0.1			12	10			0.145			20	15.8528	15.8528	35.8528	320
https://www.sciencedirect.com/science/article/pii/S0306261918315903#b0040	Yang	2019	Mix	1	100	100								100																				0.1			12	10			0.145			20	15.8528	15.8528	35.8528	320
https://www.sciencedirect.com/science/article/pii/S0306261918315903#b0040	Yang	2019	Mix	1								100		100																				0.1			12	10			0.145			20	15.8528	15.8528	35.8528	320
https://www.sciencedirect.com/science/article/pii/S0306261918315903#b0040	Yang	2019	Mix	1							100			100																				0.1			12	10			0.145			20	15.8528	15.8528	35.8528	320
https://www.sciencedirect.com/science/article/pii/S0306261918315903#b0040	Yang	2019	Mix	1	50	50				50				100																				0.1			12	10			0.145			20	15.8528	15.8528	35.8528	320
https://www.sciencedirect.com/science/article/pii/S0306261918315903#b0040	Yang	2019	Mix	1						50		50		100																				0.1			12	10			0.145			20	15.8528	15.8528	35.8528	320
https://www.sciencedirect.com/science/article/pii/S0306261918315903#b0040	Yang	2019	Mix	1						50	50			100																				0.1			12	10			0.145			20	15.8528	15.8528	35.8528	320
https://www.sciencedirect.com/science/article/pii/S0306261918315903#b0040	Yang	2019	Mix	1	50	50						50		100																				0.1			12	10			0.145			20	15.8528	15.8528	35.8528	320
https://www.sciencedirect.com/science/article/pii/S0306261918315903#b0040	Yang	2019	Mix	1	50	50					50			100																				0.1			12	10			0.145			20	15.8528	15.8528	35.8528	320
https://www.sciencedirect.com/science/article/pii/S0306261918315903#b0040	Yang	2019	Mix	1							50	50		100																				0.1			12	10			0.145			20	15.8528	15.8528	35.8528	320
https://www.sciencedirect.com/science/article/pii/S0306261918315903#b0040	Yang	2019	Mix	1	33	33				33		33		99																				0.1			12	10			0.145			20	15.8528	15.8528	35.8528	320
https://www.sciencedirect.com/science/article/pii/S0306261918315903#b0040	Yang	2019	Mix	1	33	33				33	33			99																				0.1			12	10			0.145			20	15.8528	15.8528	35.8528	320
https://www.sciencedirect.com/science/article/pii/S0306261918315903#b0040	Yang	2019	Mix	1						33	33	33		99																				0.1			12	10			0.145			20	15.8528	15.8528	35.8528	320
https://www.sciencedirect.com/science/article/pii/S0306261918315903#b0040	Yang	2019	Mix	1	33	33				0	33	33		99																				0.1			12	10			0.145			20	15.8528	15.8528	35.8528	320
https://www.sciencedirect.com/science/article/pii/S0306261918315903#b0040	Yang	2019	Mix	1	25	25				25	25	25		100																				0.1			12	10			0.145			20	15.8528	15.8528	35.8528	320
https://www.sciencedirect.com/science/article/pii/S0306261918315903#b0040	Yang	2019	Mix	1	13	13				63	13	13		102																				0.1			12	10			0.145			20	15.8528	15.8528	35.8528	320
https://www.sciencedirect.com/science/article/pii/S0306261918315903#b0040	Yang	2019	Mix	1	63	63				13	13	13		102																				0.1			12	10			0.145			20	15.8528	15.8528	35.8528	320
https://www.sciencedirect.com/science/article/pii/S0306261918315903#b0040	Yang	2019	Mix	1	13	13				13	13	63		102																				0.1			12	10			0.145			20	15.8528	15.8528	35.8528	320
https://www.sciencedirect.com/science/article/pii/S0306261918315903#b0040	Yang	2019	Mix	1	13	13				13	63	13		102																				0.1			12	10			0.145			20	15.8528	15.8528	35.8528	320
https://www.sciencedirect.com/science/article/pii/S0306261918315903#b0040	Yang	2019	Mix	1	25	25				25	25	25		100																				0.1			12	10			0.145			20	15.8528	15.8528	35.8528	320
https://www.sciencedirect.com/science/article/pii/S0960852419304353?via%3Dihub	Aierzhati	2019	food waste mixture	1	39.8179	39.8179				24.2421	35.94		4.68	100			70.13										56.16	8.05	33.19	2.61			24.51	0.03			20			3.5	1.11			40	2.07035	2.07035	42.0704	280
https://www.sciencedirect.com/science/article/pii/S0960852419304353?via%3Dihub	Aierzhati	2019	food waste mixture	1	39.8179	39.8179				24.2421	35.94		4.68	100			70.13										56.16	8.05	33.19	2.61			24.51	0.03			20			3.5	1.11			40	2.07062	2.07062	42.0706	300
https://www.sciencedirect.com/science/article/pii/S0960852419304353?via%3Dihub	Aierzhati	2019	food waste mixture	1	39.8179	39.8179				24.2421	35.94		4.68	100			70.13										56.16	8.05	33.19	2.61			24.51	0.03			20			3.5	1.11			40	2.07086	2.07086	42.0709	320
https://www.sciencedirect.com/science/article/pii/S0960852419304353?via%3Dihub	Aierzhati	2019	food waste mixture	1	39.8179	39.8179				24.2421	35.94		4.68	100			70.13										56.16	8.05	33.19	2.61			24.51	0.03			20			3.5	1.11			40	2.07107	2.07107	42.0711	340
https://www.sciencedirect.com/science/article/pii/S0960852419304353?via%3Dihub	Aierzhati	2019	food waste mixture	1	39.8179	39.8179				24.2421	35.94		4.68	100			70.13										56.16	8.05	33.19	2.61			24.51	0.03			20			3.5	1.11			40	2.07126	2.07126	42.0713	360
https://www.sciencedirect.com/science/article/pii/S0960852419304353?via%3Dihub	Aierzhati	2019	food waste mixture	1	39.8179	39.8179				24.2421	35.94		4.68	100			70.13										56.16	8.05	33.19	2.61			24.51	0.03			20			3.5	1.11			40	2.07142	2.07142	42.0714	380
https://www.sciencedirect.com/science/article/pii/S0960852419304353?via%3Dihub	Aierzhati	2019	food waste mixture	1	39.8179	39.8179				24.2421	35.94		4.68	100			70.13										56.16	8.05	33.19	2.61			24.51	0.03			20			3.5	1.11			10	2.07126	2.07126	12.0713	360
https://www.sciencedirect.com/science/article/pii/S0960852419304353?via%3Dihub	Aierzhati	2019	food waste mixture	1	39.8179	39.8179				24.2421	35.94		4.68	100			70.13										56.16	8.05	33.19	2.61			24.51	0.03			20			3.5	1.11			20	2.07126	2.07126	22.0713	360
https://www.sciencedirect.com/science/article/pii/S0960852419304353?via%3Dihub	Aierzhati	2019	food waste mixture	1	39.8179	39.8179				24.2421	35.94		4.68	100			70.13										56.16	8.05	33.19	2.61			24.51	0.03			20			3.5	1.11			60	2.07126	2.07126	62.0713	360
https://www.sciencedirect.com/science/article/pii/S0960852419304353?via%3Dihub	Aierzhati	2019	salad dressing	1	21.4912	21.4912				6.07446	72.4344		4.89	100			59.07										65.62	9.99	23.41	0.98			30.76	0.03			20			3.5	1.11			40	2.07035	2.07035	42.0704	280
https://www.sciencedirect.com/science/article/pii/S0960852419304353?via%3Dihub	Aierzhati	2019	salad dressing	1	21.4912	21.4912				6.07446	72.4344		4.89	100			59.07										65.62	9.99	23.41	0.98			30.76	0.03			20			3.5	1.11			40	2.07062	2.07062	42.0706	300
https://www.sciencedirect.com/science/article/pii/S0960852419304353?via%3Dihub	Aierzhati	2019	salad dressing	1	21.4912	21.4912				6.07446	72.4344		4.89	100			59.07										65.62	9.99	23.41	0.98			30.76	0.03			20			3.5	1.11			40	2.07086	2.07086	42.0709	320
https://www.sciencedirect.com/science/article/pii/S0960852419304353?via%3Dihub	Aierzhati	2019	salad dressing	1	21.4912	21.4912				6.07446	72.4344		4.89	100			59.07										65.62	9.99	23.41	0.98			30.76	0.03			20			3.5	1.11			40	2.07107	2.07107	42.0711	340
https://www.sciencedirect.com/science/article/pii/S0960852419304353?via%3Dihub	Aierzhati	2019	salad dressing	1	21.4912	21.4912				6.07446	72.4344		4.89	100			59.07										65.62	9.99	23.41	0.98			30.76	0.03			20			3.5	1.11			40	2.07126	2.07126	42.0713	360
https://www.sciencedirect.com/science/article/pii/S0960852419304353?via%3Dihub	Aierzhati	2019	salad dressing	1	21.4912	21.4912				6.07446	72.4344		4.89	100			59.07										65.62	9.99	23.41	0.98			30.76	0.03			20			3.5	1.11			10	2.07086	2.07086	12.0709	320
https://www.sciencedirect.com/science/article/pii/S0960852419304353?via%3Dihub	Aierzhati	2019	salad dressing	1	21.4912	21.4912				6.07446	72.4344		4.89	100			59.07										65.62	9.99	23.41	0.98			30.76	0.03			20			3.5	1.11			20	2.07086	2.07086	22.0709	320
https://www.sciencedirect.com/science/article/pii/S0960852419304353?via%3Dihub	Aierzhati	2019	salad dressing	1	21.4912	21.4912				6.07446	72.4344		4.89	100			59.07										65.62	9.99	23.41	0.98			30.76	0.03			20			3.5	1.11			60	2.07086	2.07086	62.0709	320
https://www.sciencedirect.com/science/article/pii/S0960852419304353?via%3Dihub	Aierzhati	2019	cream cheese	1	11.5477	11.5477				13.5225	74.9298		3.1	100			55.38										65.49	10.19	22.84	1.49			31.16	0.03			20			3.5	1.11			40	2.07035	2.07035	42.0704	280
https://www.sciencedirect.com/science/article/pii/S0960852419304353?via%3Dihub	Aierzhati	2019	cream cheese	1	11.5477	11.5477				13.5225	74.9298		3.1	100			55.38										65.49	10.19	22.84	1.49			31.16	0.03			20			3.5	1.11			40	2.07062	2.07062	42.0706	300
https://www.sciencedirect.com/science/article/pii/S0960852419304353?via%3Dihub	Aierzhati	2019	cream cheese	1	11.5477	11.5477				13.5225	74.9298		3.1	100			55.38										65.49	10.19	22.84	1.49			31.16	0.03			20			3.5	1.11			40	2.07086	2.07086	42.0709	320
https://www.sciencedirect.com/science/article/pii/S0960852419304353?via%3Dihub	Aierzhati	2019	cream cheese	1	11.5477	11.5477				13.5225	74.9298		3.1	100			55.38										65.49	10.19	22.84	1.49			31.16	0.03			20			3.5	1.11			40	2.07107	2.07107	42.0711	340
https://www.sciencedirect.com/science/article/pii/S0960852419304353?via%3Dihub	Aierzhati	2019	cream cheese	1	11.5477	11.5477				13.5225	74.9298		3.1	100			55.38										65.49	10.19	22.84	1.49			31.16	0.03			20			3.5	1.11			40	2.07126	2.07126	42.0713	360
https://www.sciencedirect.com/science/article/pii/S0960852419304353?via%3Dihub	Aierzhati	2019	cream cheese	1	11.5477	11.5477				13.5225	74.9298		3.1	100			55.38										65.49	10.19	22.84	1.49			31.16	0.03			20			3.5	1.11			10	2.07107	2.07107	12.0711	340
https://www.sciencedirect.com/science/article/pii/S0960852419304353?via%3Dihub	Aierzhati	2019	cream cheese	1	11.5477	11.5477				13.5225	74.9298		3.1	100			55.38										65.49	10.19	22.84	1.49			31.16	0.03			20			3.5	1.11			20	2.07107	2.07107	22.0711	340
https://www.sciencedirect.com/science/article/pii/S0960852419304353?via%3Dihub	Aierzhati	2019	cream cheese	1	11.5477	11.5477				13.5225	74.9298		3.1	100			55.38										65.49	10.19	22.84	1.49			31.16	0.03			20			3.5	1.11			60	2.07107	2.07107	62.0711	340
https://www.sciencedirect.com/science/article/pii/S0960852419304353?via%3Dihub	Aierzhati	2019	beef	1	0.0492973	0.0492973				48.4025	51.5482		2.3	100			67.53										61.32	9.29	23.24	6.16			29.31	0.03			20			3.5	1.11			40	2.07035	2.07035	42.0704	280
https://www.sciencedirect.com/science/article/pii/S0960852419304353?via%3Dihub	Aierzhati	2019	beef	1	0.0492973	0.0492973				48.4025	51.5482		2.3	100			67.53										61.32	9.29	23.24	6.16			29.31	0.03			20			3.5	1.11			40	2.07062	2.07062	42.0706	300
https://www.sciencedirect.com/science/article/pii/S0960852419304353?via%3Dihub	Aierzhati	2019	beef	1	0.0492973	0.0492973				48.4025	51.5482		2.3	100			67.53										61.32	9.29	23.24	6.16			29.31	0.03			20			3.5	1.11			40	2.07086	2.07086	42.0709	320
https://www.sciencedirect.com/science/article/pii/S0960852419304353?via%3Dihub	Aierzhati	2019	beef	1	0.0492973	0.0492973				48.4025	51.5482		2.3	100			67.53										61.32	9.29	23.24	6.16			29.31	0.03			20			3.5	1.11			40	2.07107	2.07107	42.0711	340
https://www.sciencedirect.com/science/article/pii/S0960852419304353?via%3Dihub	Aierzhati	2019	beef	1	0.0492973	0.0492973				48.4025	51.5482		2.3	100			67.53										61.32	9.29	23.24	6.16			29.31	0.03			20			3.5	1.11			40	2.07126	2.07126	42.0713	360
https://www.sciencedirect.com/science/article/pii/S0960852419304353?via%3Dihub	Aierzhati	2019	beef	1	0.0492973	0.0492973				48.4025	51.5482		2.3	100			67.53										61.32	9.29	23.24	6.16			29.31	0.03			20			3.5	1.11			10	2.07062	2.07062	12.0706	300
https://www.sciencedirect.com/science/article/pii/S0960852419304353?via%3Dihub	Aierzhati	2019	beef	1	0.0492973	0.0492973				48.4025	51.5482		2.3	100			67.53										61.32	9.29	23.24	6.16			29.31	0.03			20			3.5	1.11			20	2.07062	2.07062	22.0706	300
https://www.sciencedirect.com/science/article/pii/S0960852419304353?via%3Dihub	Aierzhati	2019	beef	1	0.0492973	0.0492973				48.4025	51.5482		2.3	100			67.53										61.32	9.29	23.24	6.16			29.31	0.03			20			3.5	1.11			60	2.07062	2.07062	62.0706	300
https://www.sciencedirect.com/science/article/pii/S0960852419304353?via%3Dihub	Aierzhati	2019	chicken	1	2.58767	2.58767				91.5888	5.82351		4.68	100			76.49										45.91	6.91	34.55	12.64			22.61	0.03			20			3.5	1.11			40	2.07035	2.07035	42.0704	280
https://www.sciencedirect.com/science/article/pii/S0960852419304353?via%3Dihub	Aierzhati	2019	chicken	1	2.58767	2.58767				91.5888	5.82351		4.68	100			76.49										45.91	6.91	34.55	12.64			22.61	0.03			20			3.5	1.11			40	2.07062	2.07062	42.0706	300
https://www.sciencedirect.com/science/article/pii/S0960852419304353?via%3Dihub	Aierzhati	2019	chicken	1	2.58767	2.58767				91.5888	5.82351		4.68	100			76.49										45.91	6.91	34.55	12.64			22.61	0.03			20			3.5	1.11			40	2.07086	2.07086	42.0709	320
https://www.sciencedirect.com/science/article/pii/S0960852419304353?via%3Dihub	Aierzhati	2019	chicken	1	2.58767	2.58767				91.5888	5.82351		4.68	100			76.49										45.91	6.91	34.55	12.64			22.61	0.03			20			3.5	1.11			40	2.07107	2.07107	42.0711	340
https://www.sciencedirect.com/science/article/pii/S0960852419304353?via%3Dihub	Aierzhati	2019	chicken	1	2.58767	2.58767				91.5888	5.82351		4.68	100			76.49										45.91	6.91	34.55	12.64			22.61	0.03			20			3.5	1.11			40	2.07126	2.07126	42.0713	360
https://www.sciencedirect.com/science/article/pii/S0960852419304353?via%3Dihub	Aierzhati	2019	chicken	1	2.58767	2.58767				91.5888	5.82351		4.68	100			76.49										45.91	6.91	34.55	12.64			22.61	0.03			20			3.5	1.11			40	2.07142	2.07142	42.0714	380
https://www.sciencedirect.com/science/article/pii/S0960852419304353?via%3Dihub	Aierzhati	2019	chicken	1	2.58767	2.58767				91.5888	5.82351		4.68	100			76.49										45.91	6.91	34.55	12.64			22.61	0.03			20			3.5	1.11			10	2.07126	2.07126	12.0713	360
https://www.sciencedirect.com/science/article/pii/S0960852419304353?via%3Dihub	Aierzhati	2019	chicken	1	2.58767	2.58767				91.5888	5.82351		4.68	100			76.49										45.91	6.91	34.55	12.64			22.61	0.03			20			3.5	1.11			20	2.07126	2.07126	22.0713	360
https://www.sciencedirect.com/science/article/pii/S0960852419304353?via%3Dihub	Aierzhati	2019	chicken	1	2.58767	2.58767				91.5888	5.82351		4.68	100			76.49										45.91	6.91	34.55	12.64			22.61	0.03			20			3.5	1.11			60	2.07126	2.07126	62.0713	360
https://www.sciencedirect.com/science/article/pii/S0960852419304353?via%3Dihub	Aierzhati	2019	hamburger bun	1	73.454	73.454				18.7064	7.83953		2.37	100			36.67										44.61	6.44	46.81	2.15			18.79	0.03			20			3.5	1.11			40	2.07035	2.07035	42.0704	280
https://www.sciencedirect.com/science/article/pii/S0960852419304353?via%3Dihub	Aierzhati	2019	hamburger bun	1	73.454		73.454			18.7064	7.83953		2.37	100			36.67										44.61	6.44	46.81	2.15			18.79	0.03			20			3.5	1.11			40	2.07062	2.07062	42.0706	300
https://www.sciencedirect.com/science/article/pii/S0960852419304353?via%3Dihub	Aierzhati	2019	hamburger bun	1	73.454		73.454			18.7064	7.83953		2.37	100			36.67										44.61	6.44	46.81	2.15			18.79	0.03			20			3.5	1.11			40	2.07086	2.07086	42.0709	320
https://www.sciencedirect.com/science/article/pii/S0960852419304353?via%3Dihub	Aierzhati	2019	hamburger bun	1	73.454		73.454			18.7064	7.83953		2.37	100			36.67										44.61	6.44	46.81	2.15			18.79	0.03			20			3.5	1.11			40	2.07107	2.07107	42.0711	340
https://www.sciencedirect.com/science/article/pii/S0960852419304353?via%3Dihub	Aierzhati	2019	hamburger bun	1	73.454		73.454			18.7064	7.83953		2.37	100			36.67										44.61	6.44	46.81	2.15			18.79	0.03			20			3.5	1.11			40	2.07126	2.07126	42.0713	360
https://www.sciencedirect.com/science/article/pii/S0960852419304353?via%3Dihub	Aierzhati	2019	hamburger bun	1	73.454		73.454			18.7064	7.83953		2.37	100			36.67										44.61	6.44	46.81	2.15			18.79	0.03			20			3.5	1.11			10	2.07126	2.07126	12.0713	360
https://www.sciencedirect.com/science/article/pii/S0960852419304353?via%3Dihub	Aierzhati	2019	hamburger bun	1	73.454		73.454			18.7064	7.83953		2.37	100			36.67										44.61	6.44	46.81	2.15			18.79	0.03			20			3.5	1.11			20	2.07126	2.07126	22.0713	360
https://www.sciencedirect.com/science/article/pii/S0960852419304353?via%3Dihub	Aierzhati	2019	hamburger bun	1	73.454		73.454			18.7064	7.83953		2.37	100			36.67										44.61	6.44	46.81	2.15			18.79	0.03			20			3.5	1.11			60	2.07126	2.07126	62.0713	360
https://www.sciencedirect.com/science/article/pii/S0960852419304353?via%3Dihub	Aierzhati	2019	vegetable	0	58.0578	58.0578				33.2644	8.67781		13.11	100			93.86										47.88	7.03	41.03	4.07			17.16	0.03			20			3.5	1.11			40	2.07035	2.07035	42.0704	280
https://www.sciencedirect.com/science/article/pii/S0960852419304353?via%3Dihub	Aierzhati	2019	vegetable	0	58.0578	58.0578				33.2644	8.67781		13.11	100			93.86										47.88	7.03	41.03	4.07			17.16	0.03			20			3.5	1.11			40	2.07062	2.07062	42.0706	300
https://www.sciencedirect.com/science/article/pii/S0960852419304353?via%3Dihub	Aierzhati	2019	vegetable	0	58.0578	58.0578				33.2644	8.67781		13.11	100			93.86										47.88	7.03	41.03	4.07			17.16	0.03			20			3.5	1.11			40	2.07086	2.07086	42.0709	320
https://www.sciencedirect.com/science/article/pii/S0960852419304353?via%3Dihub	Aierzhati	2019	vegetable	0	58.0578	58.0578				33.2644	8.67781		13.11	100			93.86										47.88	7.03	41.03	4.07			17.16	0.03			20			3.5	1.11			40	2.07107	2.07107	42.0711	340
https://www.sciencedirect.com/science/article/pii/S0960852419304353?via%3Dihub	Aierzhati	2019	vegetable	0	58.0578	58.0578				33.2644	8.67781		13.11	100			93.86										47.88	7.03	41.03	4.07			17.16	0.03			20			3.5	1.11			10	2.07126	2.07126	12.0713	360
https://www.sciencedirect.com/science/article/pii/S0960852419304353?via%3Dihub	Aierzhati	2019	vegetable	0	58.0578	58.0578				33.2644	8.67781		13.11	100			93.86										47.88	7.03	41.03	4.07			17.16	0.03			20			3.5	1.11			20	2.07126	2.07126	22.0713	360
https://www.sciencedirect.com/science/article/pii/S0960852419304353?via%3Dihub	Aierzhati	2019	vegetable	0	58.0578	58.0578				33.2644	8.67781		13.11	100			93.86										47.88	7.03	41.03	4.07			17.16	0.03			20			3.5	1.11			40	2.07126	2.07126	42.0713	360
https://www.sciencedirect.com/science/article/pii/S0960852419304353?via%3Dihub	Aierzhati	2019	vegetable	0	58.0578	58.0578				33.2644	8.67781		13.11	100			93.86										47.88	7.03	41.03	4.07			17.16	0.03			20			3.5	1.11			60	2.07126	2.07126	62.0713	360
https://www.sciencedirect.com/science/article/pii/S0960852419304353?via%3Dihub	Aierzhati	2019	fruit peels	0	83.5903	83.5903				9.50651	6.90321		5	100			91.97										43.33	5.75	49.25	1.69			17.82	0.03			20			3.5	1.11			40	2.07035	2.07035	42.0704	280
https://www.sciencedirect.com/science/article/pii/S0960852419304353?via%3Dihub	Aierzhati	2019	fruit peels	0	83.5903	83.5903				9.50651	6.90321		5	100			91.97										43.33	5.75	49.25	1.69			17.82	0.03			20			3.5	1.11			40	2.07062	2.07062	42.0706	300
https://www.sciencedirect.com/science/article/pii/S0960852419304353?via%3Dihub	Aierzhati	2019	fruit peels	0	83.5903	83.5903				9.50651	6.90321		5	100			91.97										43.33	5.75	49.25	1.69			17.82	0.03			20			3.5	1.11			40	2.07107	2.07107	42.0711	340
https://www.sciencedirect.com/science/article/pii/S0960852419304353?via%3Dihub	Aierzhati	2019	fruit peels	0	83.5903	83.5903				9.50651	6.90321		5	100			91.97										43.33	5.75	49.25	1.69			17.82	0.03			20			3.5	1.11			40	2.07126	2.07126	42.0713	360
https://www.sciencedirect.com/science/article/pii/S0960852419304353?via%3Dihub	Aierzhati	2019	fruit peels	0	83.5903	83.5903				9.50651	6.90321		5	100			91.97										43.33	5.75	49.25	1.69			17.82	0.03			20			3.5	1.11			10	2.07126	2.07126	12.0713	360
https://www.sciencedirect.com/science/article/pii/S0960852419304353?via%3Dihub	Aierzhati	2019	fruit peels	0	83.5903	83.5903				9.50651	6.90321		5	100			91.97										43.33	5.75	49.25	1.69			17.82	0.03			20			3.5	1.11			20	2.07126	2.07126	22.0713	360
https://www.sciencedirect.com/science/article/pii/S0960852419304353?via%3Dihub	Aierzhati	2019	fruit peels	0	83.5903	83.5903				9.50651	6.90321		5	100			91.97										43.33	5.75	49.25	1.69			17.82	0.03			20			3.5	1.11			60	2.07126	2.07126	62.0713	360
https://www.sciencedirect.com/science/article/pii/S0960148117311424?via%3Dihub	Couto	2018	sewage treatment	1	9.5	9.5				49.7	40.8			100													51.8	9.5	44.5	8	1.8			0.16			9.1							15	#DIV/0!	0	15	350
https://www.sciencedirect.com/science/article/pii/S0960148117311424?via%3Dihub	Couto	2018	sewage treatment	1	9.5	9.5				49.7	40.8			100													51.8	9.5	44.5	8	1.8			0.16			9.1							30	#DIV/0!	0	30	350
https://www.sciencedirect.com/science/article/pii/S0960148117311424?via%3Dihub	Couto	2018	sewage treatment	1	9.5	9.5				49.7	40.8			100													51.8	9.5	44.5	8	1.8			0.16			9.1							45	#DIV/0!	0	45	350
https://www.sciencedirect.com/science/article/pii/S0960148117311424?via%3Dihub	Couto	2018	sewage treatment	1	9.5	9.5				49.7	40.8			100													51.8	9.5	44.5	8	1.8			0.16			9.1							15	#DIV/0!	0	15	275
https://www.sciencedirect.com/science/article/pii/S0960148117311424?via%3Dihub	Couto	2018	sewage treatment	1	9.5	9.5				49.7	40.8			100													51.8	9.5	44.5	8	1.8			0.16			9.1							15	#DIV/0!	0	15	300
https://www.sciencedirect.com/science/article/pii/S0960148117311424?via%3Dihub	Couto	2018	sewage treatment	1	9.5	9.5				49.7	40.8			100													51.8	9.5	44.5	8	1.8			0.16			9.1							15	#DIV/0!	0	15	325
https://www.sciencedirect.com/science/article/pii/S0960148117311424?via%3Dihub	Couto	2018	sewage treatment	1	9.5	9.5				49.7	40.8			100													51.8	9.5	44.5	8	1.8			0.16			4.8							15	#DIV/0!	0	15	325
https://www.sciencedirect.com/science/article/pii/S0960148117311424?via%3Dihub	Couto	2018	sewage treatment	1	9.5	9.5				49.7	40.8			100													51.8	9.5	44.5	8	1.8			0.16			16.6							15	#DIV/0!	0	15	325
https://www.sciencedirect.com/science/article/pii/S0959652619312260?via%3Dihub	Chopra	2019	P. guilliermondii	0	50.5	50.5				31	15		5	96.5			9.1	18	68.2								51	6.7	42.3	5			15.8	1.3			10	10			0.145		9		15.8465	15.8465	30	260
https://www.sciencedirect.com/science/article/pii/S0959652619312260?via%3Dihub	Chopra	2019	P. guilliermondii	0	50.5	50.5				31	15		5	96.5			9.1	18	68.2								51	6.7	42.3	5			15.8	1.3			10	10			0.145		12		15.8489	15.8489	30	280
https://www.sciencedirect.com/science/article/pii/S0959652619312260?via%3Dihub	Chopra	2019	P. guilliermondii	0	50.5	50.5				31	15		5	96.5			9.1	18	68.2								51	6.7	42.3	5			15.8	1.3			10	10			0.145		15		15.851	15.851	30	300
https://www.sciencedirect.com/science/article/pii/S0960852417300937?via%3Dihub	Grigoras	2017	genus Salix	0																							47.9	6	46.09	0.01				0.01	10	40	20						32.5	0	#DIV/0!	0	0	400
https://www.sciencedirect.com/science/article/pii/S0960852417300937?via%3Dihub	Grigoras	2017	genus Salix	0																							47.9	6	46.09	0.01				0.01	10	40	20						32.5	10	#DIV/0!	0	10	400
https://www.sciencedirect.com/science/article/pii/S0960852417300937?via%3Dihub	Grigoras	2017	genus Salix	0																							47.9	6	46.09	0.01				0.01	10	40	20						32.5	20	#DIV/0!	0	20	400
https://www.sciencedirect.com/science/article/pii/S0960852420313055?via%3Dihub	Chen	2020	Duckweed	0	29.2	18.2		6.4	4.6	35.3	2.9	6.2	14.6	73.6			7.2										39.7	7.5	46.3	5.9	0.6		15.9	0.1	9	50	15						5.2	15	#DIV/0!	0	15	250
https://www.sciencedirect.com/science/article/pii/S0960852420313055?via%3Dihub	Chen	2020	Duckweed	0	29.2	18.2		6.4	4.6	35.3	2.9	6.2	14.6	73.6			7.2										39.7	7.5	46.3	5.9	0.6		15.9	0.1	9	50	15						5.2	30	#DIV/0!	0	30	250
https://www.sciencedirect.com/science/article/pii/S0960852420313055?via%3Dihub	Chen	2020	Duckweed	0	29.2	18.2		6.4	4.6	35.3	2.9	6.2	14.6	73.6			7.2										39.7	7.5	46.3	5.9	0.6		15.9	0.1	9	50	15						5.2	45	#DIV/0!	0	45	250
https://www.sciencedirect.com/science/article/pii/S0960852420313055?via%3Dihub	Chen	2020	Duckweed	0	29.2	18.2		6.4	4.6	35.3	2.9	6.2	14.6	73.6			7.2										39.7	7.5	46.3	5.9	0.6		15.9	0.1	9	50	15						5.2	60	#DIV/0!	0	60	250
https://www.sciencedirect.com/science/article/pii/S0960852420313055?via%3Dihub	Chen	2020	Duckweed	0	29.2	18.2		6.4	4.6	35.3	2.9	6.2	14.6	73.6			7.2										39.7	7.5	46.3	5.9	0.6		15.9	0.1	9	50	15						6.2	15	#DIV/0!	0	15	280
https://www.sciencedirect.com/science/article/pii/S0960852420313055?via%3Dihub	Chen	2020	Duckweed	0	29.2	18.2		6.4	4.6	35.3	2.9	6.2	14.6	73.6			7.2										39.7	7.5	46.3	5.9	0.6		15.9	0.1	9	50	15						6.2	30	#DIV/0!	0	30	280
https://www.sciencedirect.com/science/article/pii/S0960852420313055?via%3Dihub	Chen	2020	Duckweed	0	29.2	18.2		6.4	4.6	35.3	2.9	6.2	14.6	73.6			7.2										39.7	7.5	46.3	5.9	0.6		15.9	0.1	9	50	15						6.2	45	#DIV/0!	0	45	280
https://www.sciencedirect.com/science/article/pii/S0960852420313055?via%3Dihub	Chen	2020	Duckweed	0	29.2	18.2		6.4	4.6	35.3	2.9	6.2	14.6	73.6			7.2										39.7	7.5	46.3	5.9	0.6		15.9	0.1	9	50	15						6.2	60	#DIV/0!	0	60	280
https://www.sciencedirect.com/science/article/pii/S0960852420313055?via%3Dihub	Chen	2020	Duckweed	0	29.2	18.2		6.4	4.6	35.3	2.9	6.2	14.6	73.6			7.2										39.7	7.5	46.3	5.9	0.6		15.9	0.1	9	50	15						10.5	15	#DIV/0!	0	15	310
https://www.sciencedirect.com/science/article/pii/S0960852420313055?via%3Dihub	Chen	2020	Duckweed	0	29.2	18.2		6.4	4.6	35.3	2.9	6.2	14.6	73.6			7.2										39.7	7.5	46.3	5.9	0.6		15.9	0.1	9	50	15						10.5	30	#DIV/0!	0	30	310
https://www.sciencedirect.com/science/article/pii/S0960852420313055?via%3Dihub	Chen	2020	Duckweed	0	29.2	18.2		6.4	4.6	35.3	2.9	6.2	14.6	73.6			7.2										39.7	7.5	46.3	5.9	0.6		15.9	0.1	9	50	15						10.5	45	#DIV/0!	0	45	310
https://www.sciencedirect.com/science/article/pii/S0960852420313055?via%3Dihub	Chen	2020	Duckweed	0	29.2	18.2		6.4	4.6	35.3	2.9	6.2	14.6	73.6			7.2										39.7	7.5	46.3	5.9	0.6		15.9	0.1	9	50	15						10.5	60	#DIV/0!	0	60	310
https://www.sciencedirect.com/science/article/pii/S0960852420313055?via%3Dihub	Chen	2020	Duckweed	0	29.2	18.2		6.4	4.6	35.3	2.9	6.2	14.6	73.6			7.2										39.7	7.5	46.3	5.9	0.6		15.9	0.1	9	50	15						15.6	15	#DIV/0!	0	15	340
https://www.sciencedirect.com/science/article/pii/S0960852420313055?via%3Dihub	Chen	2020	Duckweed	0	29.2	18.2		6.4	4.6	35.3	2.9	6.2	14.6	73.6			7.2										39.7	7.5	46.3	5.9	0.6		15.9	0.1	9	50	15						15.6	30	#DIV/0!	0	30	340
https://www.sciencedirect.com/science/article/pii/S0960852420313055?via%3Dihub	Chen	2020	Duckweed	0	29.2	18.2		6.4	4.6	35.3	2.9	6.2	14.6	73.6			7.2										39.7	7.5	46.3	5.9	0.6		15.9	0.1	9	50	15						15.6	45	#DIV/0!	0	45	340
https://www.sciencedirect.com/science/article/pii/S0960852420313055?via%3Dihub	Chen	2020	Duckweed	0	29.2	18.2		6.4	4.6	35.3	2.9	6.2	14.6	73.6			7.2										39.7	7.5	46.3	5.9	0.6		15.9	0.1	9	50	15						15.6	60	#DIV/0!	0	60	340
https://www.sciencedirect.com/science/article/pii/S0960852420313055?via%3Dihub	Chen	2020	Duckweed	0	29.2	18.2		6.4	4.6	35.3	2.9	6.2	14.6	73.6			7.2										39.7	7.5	46.3	5.9	0.6		15.9	0.1	9	50	15						21.1	15	#DIV/0!	0	15	370
https://www.sciencedirect.com/science/article/pii/S0960852420313055?via%3Dihub	Chen	2020	Duckweed	0	29.2	18.2		6.4	4.6	35.3	2.9	6.2	14.6	73.6			7.2										39.7	7.5	46.3	5.9	0.6		15.9	0.1	9	50	15						21.1	30	#DIV/0!	0	30	370
https://www.sciencedirect.com/science/article/pii/S0960852420313055?via%3Dihub	Chen	2020	Duckweed	0	29.2	18.2		6.4	4.6	35.3	2.9	6.2	14.6	73.6			7.2										39.7	7.5	46.3	5.9	0.6		15.9	0.1	9	50	15						21.1	45	#DIV/0!	0	45	370
https://www.sciencedirect.com/science/article/pii/S0960852420313055?via%3Dihub	Chen	2020	Duckweed	0	29.2	18.2		6.4	4.6	35.3	2.9	6.2	14.6	73.6			7.2										39.7	7.5	46.3	5.9	0.6		15.9	0.1	9	50	15						21.1	60	#DIV/0!	0	60	370
https://www.sciencedirect.com/science/article/pii/S1385894721008573	Seshasayee	2021	Cellulose	1	100			100						100													42.6	6.6	50.8	0			17.8	0.01	0.3896		10			5	0.847				2.71357	2.71357	30	300
https://www.sciencedirect.com/science/article/pii/S1385894721008573	Seshasayee	2021	Cellulose	1	100			100						100													42.6	6.6	50.8	0			17.8	0.01	0.3896		10			5	0.847				2.71428	2.71428	30	350
https://www.sciencedirect.com/science/article/pii/S1385894721008573	Seshasayee	2021	Cellulose	1	100			100						100													42.6	6.6	50.8	0			17.8	0.01	0.3896		10			5	0.847				2.71481	2.71481	30	400
https://www.sciencedirect.com/science/article/pii/S1385894721008573	Seshasayee	2021	Cellulose	1	100			100						100													42.6	6.6	50.8	0			17.8	0.01	0.3896		10			5	0.847				2.71503	2.71503	30	425
https://www.sciencedirect.com/science/article/pii/S1385894721008573	Seshasayee	2021	Lignin	1								100		100													47.5	5	47.4	0.1			17.6	0.01	0.3896		10			5	0.847				2.71357	2.71357	30	300
https://www.sciencedirect.com/science/article/pii/S1385894721008573	Seshasayee	2021	Lignin	1								100		100													47.5	5	47.4	0.1			17.6	0.01	0.3896		10			5	0.847				2.71428	2.71428	30	350
https://www.sciencedirect.com/science/article/pii/S1385894721008573	Seshasayee	2021	Lignin	1								100		100													47.5	5	47.4	0.1			17.6	0.01	0.3896		10			5	0.847				2.71481	2.71481	30	400
https://www.sciencedirect.com/science/article/pii/S1385894721008573	Seshasayee	2021	Lignin	1								100		100													47.5	5	47.4	0.1			17.6	0.01	0.3896		10			5	0.847				2.71503	2.71503	30	425
https://www.sciencedirect.com/science/article/pii/S1385894721008573	Seshasayee	2021	Starch	1	100	100								100													37	7.7	55.2	0.1			17	0.01	0.3896		10			5	0.847				2.71357	2.71357	30	300
https://www.sciencedirect.com/science/article/pii/S1385894721008573	Seshasayee	2021	Starch	1	100	100								100													37	7.7	55.2	0.1			17	0.01	0.3896		10			5	0.847				2.71428	2.71428	30	350
https://www.sciencedirect.com/science/article/pii/S1385894721008573	Seshasayee	2021	Starch	1	100	100								100													37	7.7	55.2	0.1			17	0.01	0.3896		10			5	0.847				2.71481	2.71481	30	400
https://www.sciencedirect.com/science/article/pii/S1385894721008573	Seshasayee	2021	Starch	1	100	100								100													37	7.7	55.2	0.1			17	0.01	0.3896		10			5	0.847				2.71503	2.71503	30	425
https://www.sciencedirect.com/science/article/pii/S1385894721008573	Seshasayee	2021	Soy Protein	1						100				100													48	7.3	31.3	13.4			21.4	0.01	0.3896		10			5	0.847				2.71357	2.71357	30	300
https://www.sciencedirect.com/science/article/pii/S1385894721008573	Seshasayee	2021	Soy Protein	1						100				100													48	7.3	31.3	13.4			21.4	0.01	0.3896		10			5	0.847				2.71428	2.71428	30	350
https://www.sciencedirect.com/science/article/pii/S1385894721008573	Seshasayee	2021	Soy Protein	1						100				100													48	7.3	31.3	13.4			21.4	0.01	0.3896		10			5	0.847				2.71481	2.71481	30	400
https://www.sciencedirect.com/science/article/pii/S1385894721008573	Seshasayee	2021	Soy Protein	1						100				100													48	7.3	31.3	13.4			21.4	0.01	0.3896		10			5	0.847				2.71503	2.71503	30	425
https://www.sciencedirect.com/science/article/pii/S1385894721008573	Seshasayee	2021	Stearic Acid	1							100			100													75	12.5	12.5	0			41	0.01	0.3896		10			5	0.847				2.71357	2.71357	30	300
https://www.sciencedirect.com/science/article/pii/S1385894721008573	Seshasayee	2021	Stearic Acid	1							100			100													75	12.5	12.5	0			41	0.01	0.3896		10			5	0.847				2.71428	2.71428	30	350
https://www.sciencedirect.com/science/article/pii/S1385894721008573	Seshasayee	2021	Stearic Acid	1							100			100													75	12.5	12.5	0			41	0.01	0.3896		10			5	0.847				2.71481	2.71481	30	400
https://www.sciencedirect.com/science/article/pii/S1385894721008573	Seshasayee	2021	Stearic Acid	1							100			100													75	12.5	12.5	0			41	0.01	0.3896		10			5	0.847				2.71503	2.71503	30	425
https://www.sciencedirect.com/science/article/pii/S1385894721008573	Seshasayee	2021	Mixture	1	74	9		65		8	5	13		100																				0.01	0.1948		10			5	0.847				2.71357	2.71357	30	300
https://www.sciencedirect.com/science/article/pii/S1385894721008573	Seshasayee	2021	Mixture	1	74	9		65		8	5	13		100																				0.01	0.1948		10			5	0.847				2.71428	2.71428	30	350
https://www.sciencedirect.com/science/article/pii/S1385894721008573	Seshasayee	2021	Mixture	1	74	9		65		8	5	13		100																				0.01	0.1948		10			5	0.847				2.71481	2.71481	30	400
https://www.sciencedirect.com/science/article/pii/S1385894721008573	Seshasayee	2021	Mixture	1	74	9		65		8	5	13		100																				0.01	0.1948		10			5	0.847				2.71503	2.71503	30	425
https://www.sciencedirect.com/science/article/pii/S0960148119301648	Xu	2019	sewage sludge	1									35.5				83.43										33.85	5.14	16.5	5.81	3.201		16.14	0.0049	0.2712	2.7	9.12763						18		#DIV/0!	0	30	340
https://www.sciencedirect.com/science/article/pii/S0960148119301648	Xu	2019	sewage sludge-Algae 3:1	1																														0.0049	0.2712	2.7	9.12763						18		#DIV/0!	0	30	340
https://www.sciencedirect.com/science/article/pii/S0960148119301648	Xu	2019	sewage sludge-Algae 1:1	1																														0.0049	0.2712	2.7	9.12763						18		#DIV/0!	0	30	340
https://www.sciencedirect.com/science/article/pii/S0960148119301648	Xu	2019	sewage sludge-Algae 1:3	1																														0.0049	0.2712	2.7	9.12763						18		#DIV/0!	0	30	340
https://www.sciencedirect.com/science/article/pii/S0048969719356724	He	2020	Nannochloropsis sp.	0	1.21			0.3	0.91	45.63	6.2	0.52	8.28	53.56			4.1	5.34	82.28								48.41	9.01	33.91	7.38	1.29			0.1	9	51	15							30	#DIV/0!	0	30	260
https://www.sciencedirect.com/science/article/pii/S0048969719356724	He	2020	Nannochloropsis sp.	0	1.21			0.3	0.91	45.63	6.2	0.52	8.28	53.56			4.1	5.34	82.28								48.41	9.01	33.91	7.38	1.29			0.1	9	51	15							30	#DIV/0!	0	30	280
https://www.sciencedirect.com/science/article/pii/S0048969719356724	He	2020	Nannochloropsis sp.	0	1.21			0.3	0.91	45.63	6.2	0.52	8.28	53.56			4.1	5.34	82.28								48.41	9.01	33.91	7.38	1.29			0.1	9	51	15							30	#DIV/0!	0	30	300
https://www.sciencedirect.com/science/article/pii/S0048969719356724	He	2020	Nannochloropsis sp.	0	1.21			0.3	0.91	45.63	6.2	0.52	8.28	53.56			4.1	5.34	82.28								48.41	9.01	33.91	7.38	1.29			0.1	9	51	15							30	#DIV/0!	0	30	320
https://www.sciencedirect.com/science/article/pii/S0048969719356724	He	2020	Nannochloropsis sp.	0	1.21			0.3	0.91	45.63	6.2	0.52	8.28	53.56			4.1	5.34	82.28								48.41	9.01	33.91	7.38	1.29			0.1	9	51	15							30	#DIV/0!	0	30	340
https://www.sciencedirect.com/science/article/pii/S0048969719356724	He	2020	Sargassum sp.	0	47.66			9.04	38.62	9.95	0.8	13.05	43.43	71.46			4.01	2.52	50.04								28.5	2.78	65.4	2.13	1.19			0.1	9	51	15							30	#DIV/0!	0	30	260
https://www.sciencedirect.com/science/article/pii/S0048969719356724	He	2020	Sargassum sp.	0	47.66			9.04	38.62	9.95	0.8	13.05	43.43	71.46			4.01	2.52	50.04								28.5	2.78	65.4	2.13	1.19			0.1	9	51	15							30	#DIV/0!	0	30	280
https://www.sciencedirect.com/science/article/pii/S0048969719356724	He	2020	Sargassum sp.	0	47.66			9.04	38.62	9.95	0.8	13.05	43.43	71.46			4.01	2.52	50.04								28.5	2.78	65.4	2.13	1.19			0.1	9	51	15							30	#DIV/0!	0	30	300
https://www.sciencedirect.com/science/article/pii/S0048969719356724	He	2020	Sargassum sp.	0	47.66			9.04	38.62	9.95	0.8	13.05	43.43	71.46			4.01	2.52	50.04								28.5	2.78	65.4	2.13	1.19			0.1	9	51	15							30	#DIV/0!	0	30	320
https://www.sciencedirect.com/science/article/pii/S0048969719356724	He	2020	Sargassum sp.	0	47.66			9.04	38.62	9.95	0.8	13.05	43.43	71.46			4.01	2.52	50.04								28.5	2.78	65.4	2.13	1.19			0.1	9	51	15							30	#DIV/0!	0	30	340
https://www.sciencedirect.com/science/article/pii/S0360544218312568?via%3Dihub	Xu	2018	sewage sludge										35.5				90										33.85	5.14	16.5	5.81	3.2		16.1	0.0044			20			3					#DIV/0!	0	10	260
https://www.sciencedirect.com/science/article/pii/S0360544218312568?via%3Dihub	Xu	2018	sewage sludge										35.5				90										33.85	5.14	16.5	5.81	3.2		16.1	0.0044			20			3					#DIV/0!	0	10	280
https://www.sciencedirect.com/science/article/pii/S0360544218312568?via%3Dihub	Xu	2018	sewage sludge										35.5				90										33.85	5.14	16.5	5.81	3.2		16.1	0.0044			20			3					#DIV/0!	0	10	300
https://www.sciencedirect.com/science/article/pii/S0360544218312568?via%3Dihub	Xu	2018	sewage sludge										35.5				90										33.85	5.14	16.5	5.81	3.2		16.1	0.0044			20			3					#DIV/0!	0	10	320
https://www.sciencedirect.com/science/article/pii/S0360544218312568?via%3Dihub	Xu	2018	sewage sludge										35.5				90										33.85	5.14	16.5	5.81	3.2		16.1	0.0044			20			3					#DIV/0!	0	10	340
https://www.sciencedirect.com/science/article/pii/S0360544218312568?via%3Dihub	Xu	2018	sewage sludge										35.5				90										33.85	5.14	16.5	5.81	3.2		16.1	0.0044			20			3					#DIV/0!	0	10	350
https://www.sciencedirect.com/science/article/pii/0961953495000172	Minowa	1995	Garbage	1	55	55				18.4	5.3	6.1	25.3	84.8													44.2	5.8	31.2	3.5			17.7	0.3			4						18	30	#DIV/0!	0	30	340
[truncated: 50 more columns]
